# Supplementary material for: An observational study on the relationship between triglyceride glucose index and its derivatives and hyperuricemia and type 2 diabetes among healthcare professionals
Source: Research Square preprint supplement (doi:10.21203/rs.3.rs-7314112/v1), 2025-09-10
Supplement: Supplementary file 1 [file c82c7f16691eed10071b4d40.xlsx]

## Sheet: 常见项目结果
姓名	性别	年龄	空腹血糖	心率	身高	体重	收缩压	舒张压	谷丙转氨酶	谷草转氨酶	尿素	肌酐	尿酸	总胆固醇	甘油三脂	γ-谷氨酰转肽酶	高密度脂蛋白	低密度脂蛋白
闫玲	1	39	5.06	74	157	59.4	106	75	39	42	4.93	53.40	299.70	5.49	1.66	35	1.39	3.81
陈雪	1	35	4.75	78	163.5	63.4	115	72	18	18	4.86	58.60	364.00	3.88	0.62	9	1.07	2.60
李芹	1	34	4.78	79	158.5	52.3	125	100	21	24	3.90	42.10	161.80	5.06	0.56	18	1.70	3.19
刘玉淑	1	34	4.57	85	157	60.2	109	78	35	27	4.03	47.50	318.00	4.03	0.57	18	1.64	2.26
孙冉钰	1	33	4.65	75	155.5	56.6	116	72	12	18	3.70	49.20	240.60	3.59	0.68	8	1.20	2.21
吴洋龙	2	33	5.22	89	169.5	73.3	135	69	24	23	5.99	66.20	407.40	4.15	0.75	17	1.24	2.68
卞广伟	2	33	5.16	78	175	70.5	116	82	27	22	4.80	60.10	424.20	4.86	1.97	48	1.22	3.14
栾磊	2	30	4.31	90	168	69.9	147	100	21	19	8.47	77.60	357.00	4.52	1.71	30	1.18	2.94
时云云	1	32	4.82	79	157	61.4	125	77	23	20	4.00	53.10	213.90	4.09	0.50	11	1.48	2.52
梁昆峰	2	32	4.78	70	167	65.8	128	76	34	27	7.20	80.50	469.00	7.80	1.29	20	1.37	5.52
闫保国	2	33	4.91	79	173	79.6	151	79	19	18	6.26	82.40	339.80	6.36	1.35	31	1.56	4.20
郭庆	1	31	4.80	83	162	53.2	114	71	24	22	4.49	52.00	303.40	4.41	0.86	18	1.31	2.90
张亚飞	2	32	5.07	80	182	79.1	135	70	29	22	4.20	66.60	403.20	4.48	1.34	27	1.28	2.92
白妍妍	1	31	4.68	103	156.5	69.9	137	82	9	19	2.00	36.70	166.00	7.62	2.83	12	2.33	4.69
张玉平	1	31	4.37	69	163	59.6	118	75	15	40	4.60	59.60	262.00	2.94	0.66	17	1.65	1.02
王新愿	2	30	4.93	89	167.5	77.6	139	90	24	26	3.00	51.10	330.70	3.66	0.88	20	0.91	2.41
焦振	2	29	5.27	80	176	90.5	130	73	71	55	4.10	66.50	444.60	4.60	5.68	77	0.90	2.93
刘影	1	28	4.52	80	162.5	52.2	114	60	14	22	4.10	52.60	220.30	3.74	0.44	10	1.43	2.21
姚志远	2	29	4.93	82	177	80.2	125	76	76	39	4.56	69.80	472.50	5.78	3.69	65	1.15	3.91
冀昆阳	2	27	4.75	98	184.5	86.6	131	88	29	23	6.00	71.40	399.50	5.38	1.18	26	1.12	3.49
马蕾	1	29	5.15	84	157	60	93	56	11	32	3.70	45.40	240.90	4.51	0.74	9	1.48	3.01
刘世豪	2	29	4.38	78	164.5	63.8	130	70	17	23	6.45	77.70	446.20	4.93	0.66	15	1.53	3.20
杨露露	1	28	5.11	77	167.5	73.5	134	77	12	16	4.00	46.50	315.90	4.35	0.75	22	1.37	2.82
汤成	2	32	5.29	79	178.5	76	132	79	19	25	6.50	82.30	381.20	5.55	1.03	25	1.09	3.93
胡冰涛	2	24	5.38	92	172.5	74.9	130	72	38	27	4.86	70.30	298.10	4.87	1.02	25	1.46	3.17
闫硕	1	24	5.12	82	176	85.1	125	72	15	15	4.70	52.10	365.50	4.64	2.28	28	1.03	3.15
张琪琪	1	25	5.41	87	161	61.6	120	68	12	20	5.66	49.80	276.20	3.95	0.78	17	1.58	2.27
王艳红	1	37	4.56	78	159	56.4	118	73	13	17	4.00	44.90	184.30	5.06	0.53	11	1.65	3.22
王梦雷	2	26	5.68	85	177.5	100.2	121	82	65	31	5.30	71.20	603.60	5.96	2.04	43	1.20	4.32
颜秀侠	1	45	5.26	74	163	59.8	112	78	11	15	3.20	45.90	253.80	5.47	0.65	30	1.45	3.37
程慧	1	34	4.64	80	169.5	62.4	112	66	13	17	5.30	48.80	196.40	4.51	0.39	11	1.80	2.66
李黎明	2	34	5.39	79	178	116.5	134	93	40	32	5.23	63.00	334.30	3.39	1.97	59	1.04	2.09
苗倩	1	34	5.03	98	162	59.2	129	70	10	18	3.37	45.20	266.00	3.94	0.55	17	1.52	2.39
吴国柱	2	33	4.39	76	168.5	77.6	127	77	21	16	5.60	62.70	463.10	4.23	1.22	16	1.39	2.56
邱佳丽	1	27	5.31	92	164.5	88.2	125	76	25	24	5.32	55.60	341.50	4.63	1.76	23	1.04	3.10
孙楠楠	2	34	5.33	73	171.5	78.6	145	75	25	22	5.60	80.50	531.80	5.93	2.11	27	1.42	4.02
朱玉丽	1	34	5.88	76	155	60	138	75	29	25	4.02	51.40	337.30	6.31	2.33	40	1.31	4.20
王秀梅	1	32	4.73	92	158.5	54.4	122	80	17	23	6.30	53.80	230.40	3.64	0.85	20	1.37	2.14
于丽丽	1	31	3.76	77	165.5	50.9	96	59	11	19	4.20	44.40	223.30	5.24	0.65	17	1.89	2.83
张萍	1	31	4.22	79	159	56.1	133	77	10	17	3.38	50.40	261.50	4.34	0.76	9	1.58	2.50
支玉君	2	31	5.00	81	187	81.8	116	71	21	21	4.53	69.00	388.50	3.66	1.17	24	1.07	2.27
徐会停	2	32	5.37	83	165.5	79.3	134	90	24	20	5.09	74.40	426.30	5.71	2.06	29	1.21	3.84
董永康	2	29	4.51	69	180.5	81.4	113	75	24	25	6.10	70.30	312.90	3.69	0.94	23	1.31	2.28
刘小靖	1	31	4.82	77	168	59.7	118	66	12	16	6.74	52.00	247.50	3.60	0.72	46	1.13	2.30
姜宇辉	2	28	5.39	78	171	88.2	116	74	45	26	3.52	56.40	378.20	3.86	1.47	42	1.05	2.53
王强	2	29	4.32	67	172	75.6	132	84	46	90	4.35	63.70	342.20	4.90	1.04	23	1.26	3.33
时兴晨	2	28	5.09	82	180.5	91.7	140	78	33	24	4.70	76.50	532.20	3.51	0.93	21	1.09	2.22
马静	1	34	4.36	84	157	54.1	122	82	17	27	4.20	47.60	277.30	5.15	1.03	14	1.64	3.20
郭秀荣	1	42	5.30	91	162	57.4	103	64	13	19	3.60	45.70	251.00	3.72	0.62	8	1.60	2.11
唐虎	2	25	5.36	75	186.5	93.2	125	77	16	22	5.76	68.00	312.00	3.42	0.83	14	1.05	2.17
宋腾腾	1	32	4.90	84	158.5	56.9	127	85	19	23	4.90	56.90	317.70	4.17	0.40	18	1.44	颈椎退行性变；颈3/4、颈4/5、颈5/6及颈6/7椎间盘突出，局部椎管狭窄。
周妙冉	1	31	6.24	88	161.5	90.3	127	82	76	45	5.50	50.30	393.20	5.10	1.38	46	1.07	3.68
吴静	1	29	7.86	73	161	72.2	151	94	38	29	5.50	37.30	172.40	4.85	0.94	18	1.31	3.23
杨金连	1	36	4.55	75	162	65.6	101	60	10	17	4.90	53.70	277.70	3.82	0.47	12	1.46	2.27
徐丽琳	1	35	4.90	77	158.5	51.7	109	64	14	16	4.50	51.90	322.30	3.63	0.83	14	1.53	2.10
王盼春	1	36	5.00	76	158.5	67.3	130	78	40	35	3.10	40.30	348.50	5.44	1.13	153	1.68	3.52
刘燕	1	34	4.33	63	158	70.7	107	65	14	16	7.50	65.40	276.40	5.95	1.13	15	1.45	3.92
王静静	1	38	4.94	75	156.5	56.1	103	62	10	16	4.90	54.80	210.70	2.42	0.50	12	1.11	0.24
方娜娜	1	35	5.03	83	156.5	56.7	121	72	64	35	3.30	37.80	274.90	5.23	2.32	35	1.22	3.46
余娜	1	38	5.39	68	161.5	61	128	77	22	腰4/5、腰5/骶1椎间盘突出。 终丝脂肪沉积。	4.20	52.70	303.10	6.13	2.04	19	1.62	3.90
刘芳	1	35	5.03	87	155.5	52.7	142	91	15	22	4.40	42.50	290.70	4.93	1.13	20	1.37	3.17
刘淼	1	38	4.12	95	164.5	71.8	122	88	37	28	3.30	46.30	346.30	5.22	2.52	125	1.40	3.33
王莹莹	1	34	5.82	90	163.5	59.7	123	73	14	20	5.50	52.50	247.70	4.76	0.91	19	1.30	3.09
魏敏	1	57	4.99	77	156.5	70.9	146	81	22	17	4.52	55.10	348.30	4.94	2.39	29	1.11	3.23
徐承琴	1	41	4.88	74	170	60.8	115	66	13	19	4.23	43.70	247.40	4.83	0.35	15	1.87	2.71
李影	1	41	4.45	79	159	49.7	94	63	10	18	4.16	54.50	215.40	5.39	0.46	11	2.24	颈椎退行性变。
乔侠	1	44	4.80	70	155.5	55.9	107	68	35	32	5.00	58.20	317.80	5.09	0.74	35	1.72	2.93
李宁宁	1	35	4.73	72	164	71	120	76	17	18	4.63	51.80	254.80	5.33	1.38	17	1.40	3.49
郭岩岩	1	37	5.08	80	164.5	62.6	111	70	21	20	3.10	42.80	226.70	4.69	1.29	12	1.23	2.74
杨敏	1	33	5.59	81	165	53.8	120	75	16	21	3.00	53.50	227.20	6.02	0.96	19	2.19	3.45
葛素侠	1	34	4.74	77	157	59.4	108	64	15	19	4.36	45.50	175.90	5.66	0.59	18	2.20	3.19
李慧娟	1	33	3.44	89	157	55.8	114	78	15	19	4.67	53.50	256.60	5.64	0.61	12	1.46	3.85
吴宁宁	1	33	5.18	91	167	59.5	132	67	8	14	3.41	56.80	306.60	3.46	1.20	11	1.19	1.96
白婧	1	39	4.89	69	163	55.3	109	56	9	16	4.90	51.60	228.50	5.27	1.06	11	1.47	3.10
孙丽芃	1	51	4.90	89	155.5	55.7	116	73	9	22	7.00	50.90	173.70	7.21	0.59	8	2.15	4.66
张瑞	1	39	4.47	93	147.5	48	107	69	15	42	3.67	57.70	220.90	6.55	1.12	13	1.81	4.24
范渊	1	34	6.46	76	165.5	85.3	117	66	10	14	6.40	44.80	206.40	3.38	0.91	15	0.91	2.23
邹盼盼	1	35	4.30	69	158	50.4	104	70	11	19	4.33	51.40	238.20	4.91	1.04	16	1.37	3.19
姜梨梨	1	37	5.57	77	154.5	52.7	126	85	18	18	5.90	47.60	292.70	5.89	0.70	17	1.67	4.02
翟婷婷	1	34	4.46	86	162	62.9	118	69	12	18	4.70	51.20	251.30	5.10	0.84	16	1.29	3.14
聂丽	1	41	4.98	74	158.5	62.8	135	74	9	18	3.10	56.00	352.80	4.79	1.49	11	1.34	3.10
梁兰	1	36	5.35	112	159	47.3	134	84	14	22	3.76	46.10	180.30	4.07	0.64	9	1.69	2.28
孙艳峰	1	34	4.94	88	158	60	121	84	10	19	3.80	55.60	303.40	4.38	1.23	12	1.19	2.91
詹珉	1	37	4.99	78	162	62.6	109	63	11	18	3.50	41.00	244.40	5.86	2.38	14	1.56	3.77
詹萌萌	1	35	3.91	82	162	52.9	90	49	8	12	5.51	50.60	227.40	4.68	0.72	10	1.44	2.81
赵姗姗	1	36	5.29	81	165	59.6	119	71	50	44	3.70	48.00	227.10	4.64	0.98	28	1.15	3.06
杜洪	1	36	5.26	83	161.5	68.3	119	76	16	17	3.60	44.30	240.70	4.41	0.92	16	1.14	2.78
荣静	1	37	6.21	92	165	51.4	118	76	11	18	3.40	50.20	199.90	4.40	0.50	15	1.50	2.50
梁霞	1	35	5.28	61	166	75.4	106	64	11	18	3.73	51.80	281.10	4.50	1.57	21	1.29	2.53
张玲	1	38	5.16	88	150.5	58.4	121	73	16	21	5.20	37.70	211.50	6.34	1.94	16	1.27	4.27
王自兰	1	41	5.04	67	158.5	64.2	160	96	11	21	4.90	47.70	258.10	6.31	0.66	18	2.15	4.06
梁梦珍	1	34	4.82	81	157.5	44.3	101	71	12	22	5.00	46.20	252.60	5.58	0.71	11	1.63	3.27
葛君丽	1	41	5.99	72	155	76.6	114	67	55	51	3.80	58.40	313.80	4.96	1.73	31	0.96	3.25
殷园园	1	38	4.56	75	156.5	50	110	54	11	19	3.10	42.10	203.50	4.19	0.45	12	1.55	2.38
吴燕	1	37	4.99	86	160	65.2	143	92	18	22	4.73	50.30	314.30	4.30	0.99	12	1.22	2.71
薛芳	1	38	4.75	73	167.5	68.7	126	79	10	19	4.33	46.00	343.00	4.72	0.86	11	1.35	2.89
赵莹	1	35	5.77	75	160	62.3	112	68	13	16	4.71	43.80	235.00	3.59	0.43	15	1.63	2.03
王艳	1	36	4.83	88	156	67.7	126	84	35	26	4.84	49.90	276.20	4.85	0.91	14	1.35	3.18
苏曼	1	47	4.68	88	161.5	62.6	113	73	19	23	3.80	59.80	246.40	4.00	2.62	15	1.34	2.44
张晓梅	1	33	4.85	79	163	57.3	114	75	27	32	4.25	52.60	273.30	4.40	0.44	40	1.84	2.54
孙翠翠	1	24	4.96	62	174.5	59	101	62	13	18	5.40	47.80	227.10	4.48	0.49	9	1.71	2.46
李幸福	2	25	4.61	76	180	96.9	148	91	36	31	5.60	67.10	396.80	5.07	1.10	25	1.21	3.35
王明明	2	33	5.29	72	180.5	82.8	129	86	18	20	8.10	74.10	404.90	4.55	0.75	24	0.96	2.90
蒋宇	1	30	3.50	94	156	46.5	118	72	15	21	6.52	51.20	245.90	4.93	0.64	7	1.40	3.21
胡翠纹	1	31	17.49	74	160	63.6	139	85	65	46	3.17	40.80	206.70	5.36	1.71	34	1.05	3.94
费利娟	1	30	5.40	93	161	53	113	69	12	19	4.20	53.50	191.80	5.28	0.76	13	1.72	3.17
王杰杰	1	31	5.21	111	172.5	64.8	137	96	10	15	4.70	51.20	301.10	5.95	1.19	7	1.64	3.72
王杰	2	34	5.88	69	174	84.6	124	87	11	13	5.50	72.60	408.70	4.42	1.55	13	1.09	2.74
周影	1	34	5.82	81	157	73.8	131	77	28	25	4.40	35.90	320.30	4.89	1.30	53	1.26	3.37
丁彪	2	30	5.01	72	182	60.5	131	83	13	22	5.41	63.60	309.70	4.36	0.60	30	1.89	2.40
孙同洲	2	31	5.04	72	164.5	57.1	136	85	14	13	4.80	79.20	352.30	4.24	0.74	21	1.27	2.42
陈普慧	1	33	5.83	85	171.5	73	129	84	10	17	5.10	49.80	226.40	5.34	0.67	11	1.72	3.24
茹愿	2	30	4.53	84	182	92.9	119	76	22	20	4.40	67.30	558.00	4.59	2.46	31	0.83	3.14
师丽	1	35	5.27	79	160	47.9	110	73	14	18	5.40	41.90	224.60	6.40	0.85	15	1.94	3.31
高媛	1	33	4.74	86	164.5	50.6	113	56	12	16	4.60	53.60	198.10	5.57	1.19	12	1.81	3.09
王紫琳	1	29	5.30	86	171	74.7	117	53	15	18	4.90	46.10	365.30	5.61	1.30	20	1.15	3.76
宋小倩	1	33	5.26	104	166	63.8	126	77	13	18	3.46	50.80	201.20	5.19	1.07	12	1.50	3.26
马晓宇	1	28	4.67	76	167.5	74.5	106	53	17	24	5.47	53.70	273.10	4.43	0.84	17	1.50	2.68
薛雨	1	31	5.30	75	165	71	123	62	13	15	4.30	45.20	229.50	5.55	2.45	21	1.56	3.39
翟元佳	1	29	5.16	83	163.5	74.5	139	86	21	19	4.80	43.90	352.50	5.57	1.09	27	1.29	3.81
孙梦于	1	30	4.32	76	159.5	54.2	117	70	16	21	3.44	49.40	339.70	4.79	0.98	12	1.86	2.62
王梓	1	29	4.52	79	166.5	55	98	66	20	23	5.53	62.50	273.40	5.34	0.87	16	1.60	3.36
丁洪露	1	30	5.10	91	162.5	53.7	106	62	14	20	3.50	57.50	217.60	4.27	0.73	17	1.42	2.67
武丽娟	1	26	4.88	90	164	49.3	92	57	10	16	4.66	47.60	193.80	4.82	0.72	12	1.53	3.08
李洋	2	32	5.17	100	168	79.7	146	98	53	36	6.08	63.70	484.30	5.43	2.11	49	0.99	3.76
孟雨	1	30	5.36	97	162	65	129	84	18	19	5.30	63.20	314.40	4.24	0.65	15	1.30	2.59
侯旭	2	28	4.00	72	182	81.9	120	78	14	20	4.84	63.80	468.90	5.16	0.82	13	1.15	3.49
冯迎迎	1	32	4.66	82	163	65.1	127	88	15	18	4.50	53.70	311.10	3.84	0.59	12	1.04	2.63
张小然	1	41	5.14	77	166	52.7	138	96	23	25	4.60	53.80	177.60	4.35	0.99	15	1.45	2.58
秦佳音	1	41	3.45	71	159	54.2	119	76	13	23	6.49	42.80	231.60	4.32	0.55	10	1.62	2.46
杨雨	1	39	4.77	67	164.5	49.7	120	73	27	33	4.09	62.20	293.00	4.22	0.45	13	1.76	2.31
马慧芬	1	36	5.50	72	167.5	63	112	61	19	22	4.40	46.30	238.40	3.84	0.46	30	1.35	2.34
李小娜	1	38	4.57	72	165	66.3	111	72	15	21	4.15	43.10	173.20	5.32	1.49	13	1.36	3.49
葛晓燕	1	39	4.72	67	163	78.6	132	87	14	15	5.14	43.00	312.80	4.43	1.40	21	1.09	2.96
高芳	1	39	4.79	85	155	50.2	118	77	15	23	2.88	36.00	163.60	5.19	1.26	11	1.59	3.09
魏宁	1	42	4.58	68	169	75.8	133	80	18	23	3.27	39.50	329.20	4.87	0.96	20	1.25	3.19
修虹	1	36	5.40	78	165.5	64	120	71	13	20	4.14	42.00	389.50	4.33	0.75	14	1.48	2.53
侯若楠	1	26	5.05	88	175.5	73.5	104	71	19	19	3.80	54.10	304.20	6.54	2.16	22	1.33	4.25
于丰	1	34	5.18	82	166	60.1	122	73	10	17	6.00	48.50	230.40	3.76	0.61	13	1.12	2.31
谢亚南	1	37	5.40	89	167	62	112	74	14	17	3.90	57.00	216.50	4.35	0.92	11	1.51	2.61
马岩	1	38	4.83	80	160.5	63.8	112	59	15	18	4.80	42.10	185.00	4.17	1.26	20	1.34	2.48
门燕	1	41	4.84	78	161.5	63.7	121	84	17	20	4.47	48.40	264.80	4.27	0.36	17	1.63	2.55
程立梅	1	39	4.58	78	154.5	55.3	108	69	163	99	4.05	33.70	264.50	5.05	1.37	24	1.09	3.48
冀凤雷	2	33	4.70	63	168	67.8	127	88	15	23	5.97	60.20	325.10	5.86	1.39	35	1.42	3.73
孙娜娜	1	35	5.23	78	169	75.3	130	93	19	18	3.20	56.50	289.10	5.04	1.17	19	1.27	3.21
盖莹莹	1	35	5.22	76	160	60	114	64	16	15	4.30	51.60	229.80	5.45	1.84	18	1.43	3.40
张博	1	31	5.70	68	170.5	64.6	100	61	10	16	3.44	42.10	218.00	4.04	0.41	14	1.39	2.62
冯静	1	35	5.09	84	163	59	105	85	21	17	5.20	50.20	218.30	5.32	0.51	15	1.84	3.10
甘楠楠	1	32	5.25	81	154	47.5	106	67	8	18	5.50	48.70	211.60	4.47	0.39	14	1.69	2.57
朱云	1	41	5.15	99	167.5	68.7	148	85	17	17	3.42	36.90	235.30	7.17	2.15	22	1.28	4.97
王蕾	1	37	4.40	84	168	71	127	78	12	20	4.34	52.10	258.30	3.70	1.02	14	1.12	2.31
严慧霞	1	36	5.11	79	165.5	60.5	120	74	8	14	6.10	58.20	240.90	4.22	0.48	13	1.32	2.77
吴利秋	1	37	5.29	83	158.5	59.8	135	87	14	20	4.30	57.20	218.40	3.82	0.43	8	1.27	2.36
程君	1	36	5.36	79	155	57.7	109	64	15	20	3.40	42.90	259.10	4.99	1.15	28	1.10	3.46
李婷婷	1	35	4.47	87	167	71.2	144	91	17	24	4.16	45.80	254.60	4.68	0.94	13	1.11	3.19
刘娅娟	1	42	4.47	63	163.5	53.8	117	67	12	20	4.31	52.80	239.80	5.21	1.38	11	1.51	3.40
单亚萍	1	38	5.43	70	161	63.1	125	80	11	19	3.50	49.20	272.40	4.77	0.41	21	1.52	2.67
张永军	2	32	4.38	80	179.5	71.3	118	63	47	40	4.49	63.90	404.20	4.90	1.53	30	1.45	3.20
李曼林	1	38	5.42	90	160.5	50	119	80	15	20	4.15	50.20	261.90	5.81	0.65	15	1.64	3.67
王娜	1	36	6.80	70	158.5	57	135	80	12	22	3.05	46.70	215.90	5.32	0.44	9	1.81	3.15
赵德彩	1	39	4.55	77	157	54.6	103	59	9	14	2.89	39.80	254.00	3.55	0.62	11	1.30	2.29
赵灿	1	33	7.94	75	163	50	102	65	47	26	4.98	49.20	214.90	3.89	0.98	36	1.63	2.15
梁珊珊	1	35	4.72	92	159	57.5	104	64	8	15	4.30	43.40	261.40	4.64	0.73	12	1.21	3.08
杨露	1	34	4.31	78	160	59.2	102	70	18	21	4.01	52.70	270.30	5.03	1.16	39	1.57	3.21
王朋	2	34	4.81	71	175.5	76.6	140	83	21	22	5.68	76.60	363.80	4.82	1.01	23	1.33	3.11
杨欠欠	1	32	4.70	82	154.5	63.4	90	62	11	17	3.60	42.60	415.80	4.99	1.52	13	1.34	3.02
丁艳影	1	31	4.95	75	163	55.7	110	70	14	18	4.98	50.10	257.90	5.88	0.96	15	2.26	3.09
张福建	2	33	5.44	83	173.5	59.6	122	87	22	19	7.40	64.60	323.60	5.43	1.80	25	1.33	3.28
杨皖蒙	1	28	4.51	86	167	51.3	115	83	11	14	4.20	61.90	231.20	5.57	0.65	11	1.88	2.98
王彩芝	1	45	4.99	72	156.5	60.2	131	87	20	22	4.90	45.60	176.60	5.15	0.80	15	1.37	3.40
原芳	1	54	4.53	78	157	55	139	89	13	28	4.44	46.70	253.30	5.70	0.91	13	1.94	3.33
刘子凡	1	25	3.48	97	164.5	64	108	62	17	21	2.30	39.30	181.00	5.51	1.23	12	1.71	3.36
乔红	1	37	6.05	82	148	64.3	163	111	45	36	6.70	42.90	334.80	5.73	3.84	70	1.02	3.89
王彪	2	34	5.39	88	163.5	76.9	151	93	19	21	3.98	76.50	459.10	5.93	1.34	35	1.56	3.90
李坤	2	30	11.53	124	188	93	136	100	228	145	5.20	65.40	390.60	7.08	3.34	131	1.17	4.73
佟龙	2	32	5.48	86	170.5	76.5	121	76	23	19	5.20	68.20	392.70	5.63	1.50	29	1.01	4.09
尹慧	1	27	5.09	100	150.5	46.1	123	74	11	19	4.27	43.00	225.50	4.74	0.58	12	1.72	2.85
张凤磊	2	30	5.54	87	185	65.4	112	72	10	16	5.50	67.30	303.30	5.30	0.86	16	1.52	3.40
韩亚茹	1	28	5.16	87	170.5	67.5	118	72	25	21	5.20	46.40	330.80	5.45	1.52	36	1.52	2.89
孙慧	1	31	4.34	88	166	61.1	115	64	26	19	4.10	46.70	242.90	4.64	1.33	11	1.12	2.61
刘冰	2	34	5.90	93	180.5	89	121	82	40	25	6.20	71.70	526.00	5.77	3.19	63	1.18	3.79
随静	1	27	5.05	102	162	49.1	118	72	17	22	4.80	51.70	310.40	5.55	0.91	11	1.23	3.68
颜旭	1	25	5.20	94	168	56.7	100	72	8	14	3.50	60.90	199.80	4.76	0.91	13	1.42	3.11
段浩东	2	27	6.23	83	175	83.6	131	80	59	30	4.44	54.60	471.80	4.73	1.72	51	0.99	3.24
董慧芳	1	44	4.90	79	160	64	145	85	26	24	4.90	51.50	315.50	5.75	1.14	33	1.66	3.31
杜宣莉	1	37	5.72	76	160.5	55.1	139	89	16	19	4.10	46.00	411.10	7.31	1.07	32	1.18	4.94
郑滨珠	1	37	5.66	77	155	55	103	54	18	18	2.90	46.30	346.00	5.45	1.13	75	0.89	4.05
孙征	1	37	4.94	78	162	71.2	118	65	15	18	5.20	50.30	411.80	4.18	1.25	18	1.19	2.51
夏鸣	2	33	5.00	88	弃检	弃检	137	89	51	25	4.79	83.50	630.00	5.96	2.74	79	1.01	4.26
陈静	1	26	4.74	81	158.5	53.9	89	52	12	15	4.90	47.70	215.90	3.93	2.02	14	1.05	2.67
杨停停	1	24	4.83	95	154.5	48.5	109	63	13	23	4.80	57.00	268.40	6.13	0.72	14	1.67	4.17
董恒锐	2	31	5.72	91	179.5	68.3	144	90	34	24	4.50	65.60	415.40	7.07	1.95	52	1.50	4.89
修峰	2	33	5.13	82	175.5	87.8	119	81	18	25	3.60	72.30	358.30	4.39	0.88	16	0.97	2.96
赫重望	2	30	5.56	110	173	79.7	147	94	20	19	4.87	73.30	326.50	4.48	1.31	29	1.24	2.89
侯敬茹	1	31	4.40	83	161	59.3	113	67	14	17	3.60	38.60	235.40	4.23	0.97	11	1.19	2.84
佟藏	1	32	4.84	88	160.5	56.1	96	67	13	19	6.00	56.80	371.40	5.99	0.82	16	1.79	3.87
来影	1	31	5.04	78	159	79.1	126	77	17	18	4.00	48.30	293.40	4.92	0.53	22	1.17	3.37
牛一凡	1	25	5.31	84	163	44.3	116	68	10	16	2.90	40.30	193.90	4.57	0.65	15	1.55	2.79
闫威威	2	27	4.13	80	172.5	84.8	123	81	59	34	4.30	47.70	435.20	4.40	0.88	36	1.25	2.80
何丹丹	1	30	4.67	83	163.5	75.7	129	83	23	25	2.73	43.90	331.40	5.17	1.21	32	1.36	3.33
田欣	1	31	3.81	90	161	61.4	99	68	25	30	5.01	53.90	297.10	3.64	0.85	40	1.21	2.17
梁军伟	2	34	5.29	100	173	79.7	127	77	15	18	4.40	66.80	440.40	5.10	1.37	42	1.25	3.53
刘海侠	1	39	5.34	80	160.5	71.3	146	86	17	23	4.27	51.10	283.80	6.11	1.64	23	1.57	4.01
徐雪洁	1	38	5.26		168	75	124	78	20	19	5.00	45.80	373.60	5.16	1.02	14	1.73	3.06
姚冰	2	33	5.52	93	186.5	81.1	127	79	12	18	5.70	72.60	300.20	4.10	0.83	21	1.52	1.97
余宁	1	31	4.57	80	160.5	51.9	131	75	9	16	5.20	51.70	307.90	4.22	0.85	11	1.39	2.71
吕红岩	1	34	4.60	78	158.5	49.7	101	66	11	21	4.71	52.00	220.70	3.95	1.04	10	1.74	2.14
刘云飞	1	36	5.12	86	175.5	78.1	114	80	21	23	3.72	72.50	350.50	4.68	1.41	26	0.86	3.29
袁瑛	1	38	5.63	75	158	57	135	85	13	19	5.00	50.40	350.70	6.61	1.25	24	1.83	4.09
王佩佩	1	33	5.96	75	166	67.9	125	74	9	11	4.80	50.90	239.90	5.95	0.77	13	1.56	3.62
朱红瑾	1	36	4.24	90	166	56.3	110	77	7	13	3.54	45.40	170.20	4.10	0.35	10	1.33	2.55
主自强	2	24	4.84	66	176.5	66.4	109	58	18	20	5.60	64.70	344.60	3.60	0.70	27	1.41	1.93
杨心蕊	1	24	4.79	71	169	74	129	70	14	17	5.00	51.60	328.30	3.89	0.59	10	1.32	2.33
孙高	2	32	4.32	73	178	85.5	130	85	14	18	4.82	69.60	384.80	5.51	2.17	25	0.96	3.81
李兴	2	32	5.37	81	175.5	72.3	133	84	13	18	3.90	84.60	355.70	6.50	2.02	20	1.35	4.35
潘昕	1	33	5.46	78	155.5	60.1	120	73	16	16	4.80	36.00	329.80	3.86	0.95	26	1.29	2.38
孟丹	1	33	4.42	79	161	54.9	110	73	20	28	3.16	49.50	212.80	3.79	0.63	14	1.32	2.38
李卫峰	2	31	6.29	113	170.5	76.1	133	102	21	25	3.35	49.40	587.00	7.88	11.09	253	1.48	3.83
田朋	2	34	5.77	87	175.5	71.6	125	72	94	35	3.70	74.40	390.00	5.02	1.00	73	1.53	3.18
卞娜	1	25	4.60	79	弃检	弃检	117	75	13	19	6.70	46.40	198.30	5.04	0.64	14	1.66	2.94
石晶晶	1	26	4.78	78	169	58.4	117	73	11	15	3.30	45.60	279.70	3.85	0.51	16	1.60	2.25
卢存芳	1	48	5.94	99	160.5	62.6	158	93	29	29	6.30	51.30	286.20	5.31	1.58	26	1.31	3.43
李云	1	40	4.83	74	156	60.7	135	90	18	28	5.20	48.30	328.70	6.45	1.48	19	1.43	4.51
王红艳	1	38	5.15	79	弃检	弃检	123	79	34	18	4.30	49.20	288.50	7.08	1.76	25	1.23	5.04
程瑞	1	51	4.51	78	155.5	58.3	122	76	17	25	5.30	57.70	244.10	4.93	0.88	12	2.08	2.66
许皖红	1	36	4.97	86	164	60.6	117	74	15	19	5.72	49.70	255.00	4.94	0.84	17	2.01	2.75
郑艳艳	1	33	4.81	69	157.5	53.5	150	81	18	27	4.30	52.40	303.90	4.26	0.49	15	2.30	1.96
陈春雷	2	34	5.31	85	174	98	120	73	29	21	5.50	87.80	491.50	6.21	1.51	55	1.12	4.61
李庆民	2	33	5.60	90	172	81	117	77	20	22	5.50	79.10	362.10	5.08	2.18	29	1.35	3.20
谢浩然	2	23	5.53	96	176	71.3	155	88	29	23	5.31	62.20	388.70	4.35	0.47	24	1.03	3.07
李伟男	1	23	4.63	83	160	49.8	111	68	8	16	3.09	52.70	283.80	4.23	0.42	13	1.56	2.29
梁云飞	2	24	5.16	88	184	90.1	133	101	60	28	6.03	73.50	415.20	5.45	2.31	53	1.06	3.71
陆玉武	2	27	5.02	84	163.5	69.9	122	71	15	37	3.97	76.40	475.00	3.80	1.22	18	0.89	2.69
韩颖慧	1	26	4.48	93	173.5	61	119	77	12	19	3.50	53.10	251.20	5.44	0.81	15	1.91	3.26
李先鹏	2	33	5.07	77	170.5	80.1	139	87	21	20	3.79	68.20	425.10	7.14	2.02	44	1.62	4.70
程凯	2	31	4.73	88	175	86.6	150	103	29	22	5.80	61.90	390.90	5.92	2.76	34	1.38	3.93
白静	1	30	6.05	86	163	72.4	154	85	25	27	6.32	59.10	345.90	6.21	1.09	41	1.83	3.98
蒋皓月	1	30	5.15	68	166	63.4	115	71	18	21	4.02	42.60	218.80	3.83	0.88	56	1.30	2.19
雨佳	1	27	5.30	62	166	55.8	106	65	10	19	3.60	47.40	272.30	5.37	0.83	12	1.60	3.50
张亮亮	2	30	4.55	101	171.5	72	153	78	26	22	4.00	62.60	400.50	4.37	2.04	21	1.04	3.03
张倩倩	1	26	5.04	78	161.5	58	102	64	31	23	2.59	38.60	329.90	4.08	2.01	20	1.02	2.71
赵振伶	1	43	4.49	81	157	54	135	86	39	45	4.50	65.30	237.70	4.76	0.60	21	1.70	3.04
吴春雨	2	29	4.68	76	172	65.8	110	72	12	24	4.90	65.50	319.60	3.42	0.55	12	1.02	2.29
张允	1	48	5.59	73	158.5	61	132	80	22	27	4.70	50.30	249.40	5.82	3.31	24	1.39	3.74
李娟	1	38	4.84	71	162	60	117	72	21	腰4/5、腰5/骶1椎间盘突出。	5.50	42.20	354.50	4.85	1.03	17	1.71	3.00
薛文静	1	34	5.08	68	159.5	77.8	137	81	16	14	4.33	58.60	350.50	4.83	0.92	36	1.15	3.40
仇伟伟	1	34	5.52	89	162	53	114	62	11	18	5.97	56.70	307.30	5.45	0.62	21	1.67	3.44
程丽	1	42	5.19	81	159.5	67.2	139	92	34	25	5.50	46.30	418.60	4.36	1.01	18	1.01	3.04
沈燕	1	35	4.61		165	71	138	78	83	61	4.90	54.20	346.30	4.36	2.22	22	1.12	2.46
李丽	1	38	4.87	69	154.5	52.3	103	69	24	23	3.00	45.40	227.20	6.03	1.48	20	1.52	3.94
李海花	1	33	4.01	75	162	58.6	102	66	10	16	4.20	43.00	321.50	4.96	0.77	11	1.29	3.42
孙冰	1	35	4.78	66	154	52	117	74	21	27	6.10	45.70	209.50	5.00	0.93	18	1.76	2.80
王晓楠	1	32	4.05	103	165.5	58	135	80	11	28	3.36	54.50	233.50	5.26	0.62	12	1.82	3.31
梁雪纯	1	27	4.89	98	164	60.3	100	75	9	14	3.30	47.20	350.40	3.47	1.47	12	1.30	2.16
梁艳艳	1	27	4.57	80	167	55.8	127	77	19	21	3.40	50.30	221.90	4.41	0.84	15	1.44	2.69
徐慧君	1	30	5.16	80	162	56.4	110	58	13	13	3.90	51.40	221.90	5.03	1.48	12	1.53	2.99
郝玉璋	1	28	4.96	70	163	64.9	110	85	11	15	2.90	55.30	296.90	3.75	0.76	11	1.12	2.37
孙恒祥	2	33	4.83	74	173	72.9	116	71	19	21	5.00	71.10	459.20	6.53	1.30	31	1.72	4.32
桂莉	1	37	5.14	75	154.5	59.8	147	89	28	30	6.30	63.30	307.00	5.34	1.34	30	1.38	3.37
刘艳侠	1	41	4.41	74	156	50.1	115	73	24	30	6.30	63.70	316.50	5.40	0.60	15	1.96	3.09
程淑华	1	39	5.60	77	161.5	59.3	148	89	15	15	5.20	51.70	351.60	6.78	1.07	29	1.40	4.17
张文博	2	28	3.94	82	165	50.8	112	70	9	14	6.30	58.40	286.90	4.33	0.55	18	1.37	2.66
马芬	1	38	7.06	75	161.5	83.3	134	73	17	18	6.90	40.40	270.10	5.82	1.64	33	1.44	4.05
刘振飞	1	35	5.58	81	165	70	136	71	27	18	4.10	56.80	352.00	4.74	2.11	16	1.05	2.95
陆晓琳	1	34	4.08	72	160	56	110	64	14	19	3.59	50.80	223.80	5.57	0.88	9	1.54	3.67
洪子	1	32	5.18	80	158	69	100	65	25	22	6.50	56.20	382.60	5.42	1.19	15	1.51	3.61
杨稳稳	1	34	4.75	78	165	55	120	70	10	17	4.50	56.60	279.60	3.51	0.81	10	1.38	2.05
卞小燕	1	33	5.56	113	168.5	61.5	129	87	16	20	5.10	51.80	230.20	4.90	0.83	9	1.78	2.92
程琳	1	32	4.15	78	155	64.1	96	69	12	18	4.10	44.30	354.20	5.73	1.40	12	1.49	3.75
何盈盈	1	32	4.66	80	167	64.3	101	60	7	17	5.25	48.10	268.30	3.68	0.84	8	1.23	2.23
侯艳华	1	25	5.06	85	164.5	49.7	102	67	8	18	4.00	54.20	326.30	4.02	0.68	12	1.48	2.30
徐秀荣	1	48	4.85	70	146.5	57	116	74	20	21	4.00	35.60	302.90	5.68	2.14	22	1.67	3.56
马磊	1	36	4.75	83	160.5	56.6	119	75	13	22	2.70	43.10	229.40	4.91	0.62	12	1.58	2.99
于倩	1	35	4.93	87	158	60	121	70	23	25	4.29	43.10	322.80	5.66	0.57	20	2.08	3.58
曹齐	1	37	5.05	80	165.5	57.2	94	65	20	23	3.12	49.90	200.30	5.20	0.92	24	1.79	3.15
何倩倩	1	38	4.63	74	164	71.4	100	65	11	16	6.50	87.10	456.60	4.95	1.05	12	1.62	2.92
吴惠敏	1	34	5.50	61	156.5	48.4	109	64	13	18	3.10	43.20	323.90	4.55	1.17	18	1.24	2.97
王晓雯	1	37	4.71	87	153.5	52.7	119	66	14	18	4.40	47.90	326.60	4.86	0.94	15	1.44	3.12
李敏	1	52	4.76	75	156.5	53.6	124	79	16	19	4.90	55.90	259.60	4.48	1.04	18	1.65	2.65
王会	1	35	5.08	84	157.5	52	115	69	10	20	3.80	50.00	193.50	3.97	0.71	12	1.30	2.48
李歆	1	37	4.52	83	158.5	61.7	114	81	10	16	4.50	55.80	308.10	4.16	0.57	12	1.35	2.47
王丽娜	1	34	4.58	70	163	59	107	65	11	17	5.26	54.20	264.40	3.73	0.87	11	1.40	2.11
陈琛	1	34	5.83	110	165	61.2	137	88	15	18	4.48	48.40	275.90	5.24	1.34	18	1.75	3.34
张启明	2	31	5.19	85	182	101	177	97	17	21	3.70	87.60	301.30	5.81	1.41	22	1.13	4.22
吕艳慧	1	28	4.82	69	161	60.8	113	68	14	17	6.10	62.30	396.40	5.56	0.80	15	1.33	3.85
申晓雪	1	27	4.53	70	157	52.3	110	65	11	18	4.10	64.80	173.10	4.02	0.89	13	1.28	2.57
钱纹静	1	31	5.33	91	170.5	86.8	134	80	17	19	3.40	47.20	362.70	6.51	2.01	21	1.19	4.32
张宁	1	31	4.01	75	157	65.6	98	63	67	48	3.80	28.50	229.20	5.98	1.78	32	1.94	3.52
刘士梅	1	30	4.58	86	155.5	56.8	118	75	8	18	4.90	61.80	287.80	5.44	0.77	11	1.37	3.62
冀红	1	35	4.64	78	154	62.4	128	72	12	17	4.02	34.60	229.30	4.27	0.51	11	1.50	2.77
何娟娟	1	33	5.43	88	160	89	156	103	19	18	6.10	44.40	379.60	4.89	0.90	18	1.53	3.15
李妍	1	38	4.03	71	154.5	69.1	95	61	25	24	3.50	42.10	281.00	6.49	4.10	66	1.35	3.78
卞丽	1	38	5.31	79	155	63.1	149	92	23	29	4.50	49.40	282.30	5.05	1.01	44	1.38	3.23
白方	1	34	4.76	65	156	51.3	107	56	10	17	3.20	48.20	244.60	4.27	0.67	13	1.39	2.74
张诺	1	36	5.12	81	166.5	55.5	115	68	13	21	4.30	54.70	300.00	4.80	0.75	18	1.55	2.94
锁洁	1	39	5.71	72	171	59.7	121	75	9	13	4.90	55.40	300.50	5.25	1.64	18	1.25	3.61
铁琳	1	30	4.80	95	157	55.9	102	70	29	32	5.00	54.10	204.70	6.02	0.74	26	1.53	3.99
马柯柯	1	30	5.16	73	161.5	61.7	115	64	67	31	3.30	37.40	338.40	6.07	1.57	31	1.18	3.94
潘娜娜	1	25	4.97	77	166	72	129	67	27	30	2.97	53.80	227.90	4.73	0.56	16	1.50	2.72
史盼盼	1	25	5.51	90	163	53.1	114	70	14	20	3.34	48.50	237.80	4.78	0.70	12	1.54	2.91
唐雪丽	1	33	5.25	74	172.5	71.6	116	65	13	14	4.35	53.70	287.30	3.97	0.86	12	1.03	2.71
王海燕	1	31	4.08	74	158	53	120	72	13	22	4.70	47.20	232.30	4.05	0.70	11	1.53	2.35
孙玉	1	28	4.61	78	169	68.1	104	67	11	20	3.90	47.10	264.70	5.55	1.87	13	1.03	3.91
王静静	1	33	5.36	101	165	75	136	74	11	20	4.30	54.50	340.80	5.91	1.09	14	1.58	4.00
高雅晴	1	26	5.35	90	157.5	73.4	135	81	10	14	4.10	63.20	363.30	5.64	1.69	24	1.25	4.00
张迪	1	26	5.89	93	162	61.2	119	62	13	19	3.70	51.70	370.40	5.51	1.29	14	2.19	3.15
马丽	1	37	4.44	82	170	59.8	124	79	10	15	4.40	50.60	330.80	5.00	1.52	6	1.40	3.17
焦伟利	1	36	5.12	63	161	63	121	63	14	22	5.00	67.20	290.80	5.65	0.56	16	1.76	3.85
马燕	1	35	6.21	98	154.5	64.6	135	80	17	17	4.89	49.40	253.90	4.87	0.76	20	1.42	3.15
孙利敏	1	41	4.31	80	165	71.5	110	60	13	23	6.27	48.90	321.80	3.90	0.71	10	1.20	2.35
曹平平	1	36	4.49	64	167	60.5	144	92	12	17	3.10	47.70	267.10	4.56	0.73	13	1.48	3.00
张杰	1	33	4.43	69	161	53	112	73	12	19	3.60	57.00	232.80	3.50	1.07	17	1.10	2.00
邹琳	1	38	4.71	70	160	72.5	105	65	22	25	3.29	50.80	266.60	5.25	1.18	15	1.86	2.98
胡蒙蒙	1	33	5.25	103	163.5	66.7	128	75	17	24	4.81	46.40	288.60	4.80	1.30	13	1.17	3.23
刘运勤	1	41	5.15	75	167	63.9	99	64	15	16	5.60	49.50	312.60	6.23	1.91	20	1.68	4.04
马丹	1	34	5.34	106	159.5	59.3	126	88	23	21	7.60	49.50	265.90	5.12	1.07	25	1.24	3.16
刘斯雯	1	23	5.23	95	157	59.9	121	74	13	16	5.40	58.60	286.00	3.76	0.62	15	1.29	2.27
周亚茹	1	24	5.08	87	166	49.2	122	73	12	16	3.77	49.30	197.10	4.68	1.09	11	1.43	3.01
李梦香	1	24	5.55	78	163	54.6	110	63	11	18	4.30	42.40	319.30	5.51	0.62	11	1.64	3.69
李婉	1	33	5.71	72	165	57.3	118	61	12	16	3.70	52.10	212.80	6.23	0.56	12	2.40	3.54
张哑利	1	29	5.02	96	162	47.5	113	68	60	32	4.90	61.70	487.30	3.36	0.75	75	1.23	2.04
康娜	1	27	4.81	89	166	56.2	105	65	12	18	4.74	60.50	279.90	5.28	0.86	10	1.43	3.54
刘宁	1	38	4.77	76	165	61	121	65	11	19	3.50	44.90	198.40	4.65	0.63	11	1.67	2.83
郭会娟	1	35	4.71	76	158	50.1	103	68	7	16	3.27	48.80	221.40	3.39	0.72	11	1.08	2.10
侯伟涛	2	31	4.92	77	179.5	74.4	137	91	18	18	4.63	68.40	499.00	4.06	1.19	20	0.97	2.81
孙雨若	1	25	4.95	67	160	56.1	117	62	15	22	2.70	44.50	265.60	4.09	0.66	14	1.76	2.19
刘娇	1	35	4.60	96	153	60.5	133	86	74	51	2.98	47.10	303.20	4.65	2.67	46	0.97	3.07
邱丹丹	1	37	4.41	70	160	62.6	130	67	16	23	6.50	48.10	238.70	6.10	1.86	12	1.45	3.98
沈婕	1	32	4.68	91	170.5	67.4	113	63	22	24	5.91	49.30	284.40	4.97	0.79	18	1.62	3.32
宋小丽	1	35	5.11	68	155.5	76	145	95	13	20	5.10	62.30	241.80	6.14	1.33	18	1.38	3.99
张冀飞	2	34	4.93	78	175.5	68.5	132	78	12	22	3.60	65.10	357.90	7.26	4.11	29	1.52	4.30
李静	1	42	4.10	84	157	70	129	83	14	19	2.80	43.90	315.10	4.71	1.27	13	1.02	2.95
赵小玉	1	48	5.51	60	弃检	弃检	166	100	21	25	3.43	38.10	200.80	5.32	1.74	81	1.73	3.31
郭圆圆	1	32	4.34	95	159	56.7	111	70	13	20	2.50	47.80	264.50	4.64	0.99	11	1.67	2.67
张洋洋	1	29	4.99	71	162	60	107	66	15	17	6.90	54.00	287.40	5.75	0.55	12	2.04	3.18
李敏	1	47	5.49	76	157.5	55.2	142	82	66	49	4.10	51.50	260.80	6.29	0.72	20	1.43	4.22
侯洋	1	50	4.90	85	163.5	70.8	146	91	28	22	3.24	45.90	231.40	6.53	1.73	34	1.54	4.36
尹侠	1	48	4.46	76	162.5	56.1	152	91	21	24	5.70	51.00	314.60	5.68	1.38	24	1.33	4.33
李凡贝	1	31	4.98	80	159.5	59.8	110	71	14	20	5.70	55.20	289.20	4.19	0.43	17	1.29	2.70
李侠	1	45	5.40	71	168.5	62.1	121	80	17	20	4.20	58.60	278.60	5.35	0.94	11	1.79	3.40
黄刘雪	1	35	5.03	96	164	56.6	114	64	11	18	3.50	40.90	240.70	5.57	1.23	16	1.64	3.07
张园园	1	39	5.80	79	151	49.7	111	83	23	25	4.80	46.60	291.40	4.41	1.12	52	1.30	2.74
白淑君	1	33	5.33	74	158	70.4	118	86	37	25	3.20	42.70	323.10	4.77	1.17	26	1.39	3.22
夏海霞	1	49	5.87	76	162	72.3	166	99	11	19	4.30	48.50	291.20	6.01	1.06	46	1.57	4.10
贾梦梦	1	29	5.07	69	160	50.5	89	52	15	21	4.40	47.10	212.00	4.07	0.57	15	1.86	2.16
谢静	1	35	4.44	94	157.5	45.5	126	73	10	19	3.50	46.70	262.10	5.38	0.93	12	1.73	3.39
张自田	1	42	6.34	90	163.5	61.2	128	85	13	20	3.56	41.70	240.40	5.19	1.27	22	1.35	3.48
葛菊	1	41	4.63	79	158	53	125	74	12	17	5.58	46.10	288.10	4.15	0.77	14	1.45	2.42
黄学利	1	52	5.12	80	157.5	55.7	142	79	19	27	4.70	54.80	366.40	6.53	1.45	19	1.73	4.11
杜晓娟	1	35	4.84	80	160	77.1	119	79	19	23	5.60	39.90	220.00	4.29	1.06	23	1.33	2.68
何凤琴	1	48	4.83	86	162	64.8	132	82	14	22	3.10	42.80	228.00	5.23	0.63	17	1.84	3.19
薛钫	1	27	4.69	98	弃检	弃检	128	89	79	65	3.45	58.10	523.10	4.80	0.64	30	1.14	2.89
岳欢欢	1	31	5.19	54	弃检	弃检	108	56	10	19	3.62	50.40	307.70	5.94	1.31	13	1.51	3.93
张小晴	1	30	4.71	77	156.5	46.1	96	66	11	18	5.70	51.20	229.10	5.67	0.49	10	1.89	3.37
胡晓婷	1	28	5.26	84	159.5	63.7	113	65	14	18	2.70	47.00	300.10	4.17	1.05	30	1.08	2.74
张丽侠	1	46	6.73	90	158	67.4	134	72	27	21	3.48	45.90	384.80	6.20	1.88	23	1.48	4.17
王克南	2	29	3.76	85	174	87.6	146	97	33	23	4.39	73.20	540.40	5.19	4.46	31	0.95	3.38
时磊	2	30	4.59	64	173.5	73.9	132	75	13	21	4.74	69.00	264.70	4.50	0.96	19	1.51	2.76
王静	1	37	4.39	99	174	65	110	70	18	23	5.10	53.00	249.30	5.76	0.63	12	1.87	3.68
徐明明	1	40	5.06	81	156	60.8	152	92	23	22	5.40	53.80	293.80	5.85	0.88	21	1.72	3.63
马尧尧	2	34	5.35	72	184	77.9	141	91	14	20	5.80	72.80	270.30	5.28	1.40	40	1.71	3.31
唐娜	1	34	5.62	84	168	59	124	78	22	24	5.20	68.50	293.10	4.36	0.73	18	1.39	2.91
陈珲	1	34	5.47	89	158	55.8	115	66	14	23	3.51	48.20	235.30	4.64	0.79	12	1.48	2.93
陆迪雅	1	35	5.16	79	165.5	73.1	131	70	13	17	3.63	46.20	222.30	4.79	0.97	13	1.52	3.00
马兰	1	47	4.80	98	154	47	105	69	11	20	3.90	52.20	270.60	4.31	1.37	21	1.15	2.88
王利平	1	36	4.34	76	157	54.4	115	71	14	18	3.58	37.00	198.30	3.36	0.60	13	1.18	2.15
邓金婉	1	35	5.84	72	158	65.1	107	73	19	16	4.30	44.60	233.50	6.12	1.46	24	1.62	3.57
徐晴晴	1	28	4.60	87	155.5	56.1	116	69	16	23	4.11	43.80	259.10	3.62	1.00	13	1.21	2.24
李芳	1	27	4.28	87	159	56	119	81	13	17	4.75	47.40	233.00	3.78	0.61	13	1.61	2.01
任彩云	1	25	4.50	85	166	61.1	121	66	31	31	3.33	48.00	287.80	4.52	1.04	11	1.64	2.62
吴柯	1	27	4.93	69	168	94.1	168	110	15	20	4.06	47.30	287.30	5.17	4.40	28	1.05	3.33
谢文娟	1	41	5.90	83	160.5	62.8	125	85	21	29	5.00	51.70	328.30	5.92	1.20	21	1.40	3.87
李丽	1	35	5.21	101	157	69	124	69	24	20	6.51	70.10	398.90	5.48	5.99	51	0.83	3.15
宋姗	1	36	5.17	91	157.5	58.8	128	79	24	17	3.30	52.60	280.50	6.15	1.68	22	1.14	4.06
韩兰兰	1	25	5.08	79	159.5	46.6	113	73	30	26	4.93	45.20	279.40	4.06	0.48	12	1.52	2.53
郝会敏	1	24	4.85	73	162.5	63.6	120	64	8	16	3.00	56.20	278.80	4.69	1.44	10	1.33	2.89
丁明明	1	32	5.13	73	168.5	64.8	109	69	14	17	4.80	53.90	235.50	5.00	1.65	19	1.20	3.24
柴淑蕊	1	28	4.86	73	165	54.1	119	67	13	20	4.20	55.20	231.70	3.10	0.71	23	1.37	1.63
李东莉	1	27	3.95	99	169.5	55.2	119	87	18	18	4.37	50.20	221.10	4.79	1.09	19	1.64	2.87
石杰	1	38	4.50	90	155	64	130	89	14	19	3.53	47.80	330.10	4.18	0.97	11	1.18	2.62
张梦宇	1	24	8.81	80	171	93.4	108	77	47	31	4.00	56.10	275.40	5.47	1.28	25	1.37	3.61
毕玉英	1	28	4.41	76	158	60	117	67	14	19	4.99	57.10	372.00	4.15	0.63	12	1.10	2.63
刘洋	2	30	4.77	77	170	83.9	122	76	27	23	4.97	86.20	295.70	4.04	0.70	16	1.22	2.50
陈红敏	1	33	4.49	88	162	55.4	115	69	21	28	3.93	51.10	225.00	5.22	0.97	15	1.39	3.43
徐玲	1	40	4.26	72	162	55.9	114	70	14	21	5.12	60.40	178.10	5.24	1.26	14	1.58	3.36
宋尚静	1	27	4.15	97	162	45.5	87	48	9	14	3.70	52.00	266.40	4.22	0.57	12	1.42	2.24
张琦珍	1	44	4.96	84	158	58.6	151	97	13	19	3.80	44.40	248.30	4.93	0.82	15	1.56	3.12
李明露	1	32	5.41	83	166.5	65	104	63	12	16	4.80	50.80	266.30	4.15	0.87	14	1.21	2.55
柴小玉	1	37	4.97	83	158	56.8	115	77	20	35	4.80	58.50	245.60	6.29	1.25	30	1.38	4.17
郑爱华	1	55	5.35	94	151.5	50.2	111	73	99	81	5.90	42.30	262.30	5.83	1.21	127	1.41	3.80
钱晓芳	1	56	4.31	69	165.5	70.4	126	76	36	38	2.38	46.20	228.20	5.00	1.03	67	1.70	3.11
徐莹	1	61	6.75	89	160.5	60.1	162	93	23	23	6.73	58.70	219.80	5.86	1.16	11	1.71	3.75
袁凤侠	1	61	5.63	104	159	66.9	96	69	15	21	5.66	52.00	350.90	4.90	1.28	21	1.21	3.33
孙侠	1	62	4.33	81	160.5	55.1	126	84	515	314	2.26	48.40	189.90	7.99	0.76	445	2.98	4.62
刘辉	1	60	9.11	85	154	70.5	149	80	13	14	5.79	35.10	139.60	3.45	1.14	21	1.16	1.96
吴秀芳	1	63	4.79	74	158	70	149	85	17	20	4.38	48.00	264.90	6.66	0.82	26	2.05	4.08
李莉	1	64	5.60	85	150	57.1	147	77	12	28	4.32	61.70	321.70	7.86	3.83	29	1.76	4.99
瞿艳敏	1	65	6.63	95	151.5	64.7	145	86	14	15	5.00	49.70	381.50	5.29	3.29	69	1.00	3.49
余舒娅	1	65	4.80	83	155	54.1	127	82	13	30	4.40	46.70	163.80	5.87	0.61	15	1.63	3.85
慕玲	1	65	5.03	79	150	57.7	131	77	20	23	5.81	59.00	240.50	4.42	1.71	18	1.16	2.79
郭彦华	1	65	4.33	59	158.5	46.5	141	79	11	21	4.07	50.30	290.30	6.06	1.25	13	1.50	3.94
朱晖映	1	65	4.64	63	162	61	144	78	22	25	5.10	83.90	418.20	4.69	1.66	16	1.47	2.56
张秀英	1	65	5.23	82	177	73.2	119	81	21	22	4.57	56.90	209.70	6.46	1.25	41	1.38	4.47
李军	1	60	5.82	96	156.5	67.6	158	97	34	21	5.50	62.40	384.60	6.64	1.12	46	1.51	4.44
唐玉娟	1	65	6.41	93	154.5	59.8	143	82	14	24	5.30	56.10	228.30	4.80	0.75	20	2.13	2.63
李玲	1	65	6.10	74	165.5	83.6	129	78	43	46	5.10	39.90	273.50	3.96	1.92	24	0.90	2.57
贾成云	1	64	5.51	72	159.5	54.9	91	58	21	36	6.00	47.80	331.00	5.52	1.23	36	1.89	3.23
周莉	1	64	5.43	75	159.5	58	107	60	17	23	4.90	72.10	211.10	3.83	0.73	16	0.93	2.60
谢延林	1	66	5.07	89	153.5	57.4	118	74	21	28	3.80	55.10	341.20	3.55	1.06	12	1.38	1.86
魏淑霞	1	59	4.82	85	165	70.9	145	86	24	21	5.03	46.50	359.00	5.71	5.45	52	1.27	3.57
王淑珍	1	66	4.33	76	152	51.5	124	72	17	26	3.99	42.90	237.70	6.26	2.19	39	1.32	4.21
纪晓君	1	66	5.92	68	158	63	123	69	18	26	4.60	48.40	233.00	5.88	0.97	15	2.08	3.49
马平	1	60	5.27	74	162	63.6	142	89	15	24	3.03	44.50	279.70	5.93	0.74	17	1.83	3.61
杨永丽	1	62	7.61	88	166	60.4	156	90	16	27	5.91	59.50	248.90	6.14	1.20	15	1.54	4.12
朱国庆	1	67	5.00	72	155.5	56.2	126	73	17	24	5.00	42.20	341.70	6.01	1.54	17	1.56	3.61
孙文美	1	67	5.47	80	162	45.5	143	79	12	25	3.90	46.50	186.30	5.90	1.14	16	1.74	3.68
洪永芹	1	68	6.96	69	158	68.2	165	51	16	22	5.10	63.00	- 6.2	5.25	1.19	25	1.45	3.31
周利军	1	68	5.24	79	151	61.1	146	90	17	24	4.20	51.50	216.60	4.28	0.89	22	1.57	2.64
卢莉	1	69	5.21	95	160.5	59.9	124	83	10	26	3.42	46.20	254.30	5.72	2.42	20	1.12	3.85
王桂环	1	69	5.57	62	160.5	76.6	117	64	27	26	7.10	54.10	341.90	6.53	1.53	34	1.51	4.13
孙武侠	1	64	5.51	68	153	64	138	85	20	22	4.90	47.20	352.80	5.55	1.35	16	1.48	3.59
张玲	1	69	4.61	84	154.5	49.7	91	55	12	30	3.25	59.20	239.70	3.78	0.98	13	1.64	2.14
茹秀云	1	68	5.81	64	159.5	64	140	71	25	24	6.49	53.60	354.30	6.00	1.12	31	1.50	4.01
华应娣	1	69	5.10	93	155.5	49.1	152	75	16	23	5.08	44.20	392.20	4.51	1.30	20	1.31	2.75
蒋红兰	1	70	5.26	82	151	70	157	75	84	65	4.90	58.00	362.40	4.88	4.16	25	0.89	3.12
王素玲	1	70	10.68	66	144	48	148	70	64	30	5.30	61.40	203.20	5.80	0.92	33	2.19	3.15
史强	1	70	4.34	74	155.5	61.9	134	75	13	21	5.89	60.90	255.90	4.45	1.03	11	1.46	2.80
赵颖	1	69	4.91	77	161	67	128	78	24	28	5.13	69.50	377.10	5.29	0.73	16	1.76	3.12
李素侠	1	72	5.15	77	144	56.5	187	88	17	26	6.80	57.10	510.00	8.56	1.23	36	1.87	5.39
姜秀英	1	72	6.53	87	158.5	67.1	151	81	20	20	4.07	57.40	334.30	4.18	1.78	17	1.07	2.62
范爱莲	1	72	4.44	69	150	58.6	144	71	20	29	6.40	74.70	372.40	5.41	2.44	14	1.11	3.53
胡凤兰	1	72	4.64	75	148	44.6	129	70	26	23	4.77	43.50	245.80	3.72	1.04	13	1.48	2.13
陈彩玲	1	71	5.09	95	162.5	71.9	162	96	36	24	5.50	48.30	351.60	6.06	1.29	77	1.16	4.23
杨成兰	1	72	8.82	76	158	54	150	81	20	28	5.90	55.00	286.30	5.10	0.89	24	1.20	3.47
刘宝兰	1	71	5.43	71	164.5	66.6	165	80	18	25	6.70	80.30	372.70	5.17	1.10	67	1.10	3.49
徐秀荣	1	72	4.96	63	146	46.2	133	67	24	28	8.69	45.20	258.90	4.64	1.66	24	1.47	2.72
韩淑娟	1	65	4.41	69	154.5	48.9	132	70	21	27	3.30	45.60	307.30	6.84	2.13	21	1.40	4.66
徐永娟	1	72	5.13	65	175	73	145	65	10	14	8.35	58.80	435.40	4.96	0.83	19	1.60	3.21
宁桂芹	1	74	4.79	64	141	46.6	150	73	36	32	3.40	51.80	286.40	4.78	0.76	12	1.73	2.87
孟祥银	1	74	6.85	70	161	66.1	149	78	18	22	4.70	42.20	250.30	4.52	1.64	11	1.22	2.50
汤惠玲	1	74	6.30	64	149	61.4	144	91	21	27	5.50	57.10	367.70	3.65	2.12	26	1.37	2.07
孙玉荣	1	73	4.99	70	156	68.1	152	73	25	31	3.70	58.20	342.20	3.20	1.07	56	1.30	1.71
贾美玲	1	73	6.85	78	154	66.7	170	77	13	22	5.50	52.90	275.10	4.65	2.53	15	1.44	2.80
张治兰	1	73	4.97	80	162	63.4	126	71	16	25	3.40	46.00	299.60	5.34	1.21	36	1.26	3.62
裘杰	1	74	5.96	71	151.5	59.7	141	83	34	41	5.21	61.50	298.10	5.32	1.77	27	1.44	3.47
谢云侠	1	68	4.71	84	159	61	148	83	13	20	3.99	58.60	167.00	5.16	1.52	11	1.68	3.23
赵秀芹	1	70	4.91	83	157.5	70	184	86	34	35	5.10	39.30	338.60	4.41	0.91	22	1.19	2.96
朱洪兰	1	70	4.58	85	153.5	62.5	127	94	18	21	3.42	49.00	265.50	4.76	1.02	10	1.32	3.20
谢黎明	1	74	6.09	86	162.5	74.3	160	83	25	29	6.50	56.20	433.40	4.60	3.11	36	1.25	3.00
张守真	1	80	4.40	63	143.5	46.3	145	58	17	28	6.93	60.60	339.60	4.11	0.50	16	1.94	2.09
陈玉英	1	80	5.36	71	160.5	67.5	156	80	28	32	6.70	62.20	290.00	4.32	4.36	29	1.04	2.45
张志英	1	72	4.18	68	弃检	弃检	168	93	13	21	5.50	59.80	210.60	8.42	1.36	19	1.18	6.22
侯秀华	1	81	5.11	79	153.5	58	119	63	18	21	8.06	78.00	422.20	2.91	2.26	26	0.90	1.67
姜士英	1	78	7.55	64	154	71	134	57	26	23	23.00	136.60	672.20	4.82	1.52	73	1.10	3.12
朱福莲	1	82	5.36	85	144.5	51.7	145	78	12	21	7.30	58.60	224.30	5.23	1.39	14	0.97	3.39
李文清	1	83	4.40	72	152.5	61.6	129	78	15	18	5.60	74.10	322.10	4.63	1.07	14	1.52	2.90
李爱华	1	79	4.93	92	144.5	64.8	156	95	40	33	6.50	54.90	425.50	4.13	0.72	23	1.40	2.54
白秀荣	1	78	4.52	71	157.5	70.4	137	72	9	20	3.60	50.60	181.20	4.10	0.97	27	1.94	2.13
马玉兰	1	83	4.93	65	154.5	53.2	157	76	50	62	6.08	76.00	275.20	4.38	1.43	25	1.20	2.69
杨玲	1	69	4.57	87	170.5	67.9	132	81	20	26	4.91	45.00	314.30	5.74	0.98	31	1.80	3.53
孙玉仙	1	78	5.66	81	153.5	48	160	79	17	25	4.90	48.60	134.30	5.04	0.49	14	1.88	3.07
吴美华	1	71	5.80	74	156.5	63.2	179	81	12	19	6.92	56.10	534.80	4.08	1.33	28	1.35	2.48
詹景秋	1	80	4.54	86	弃检	弃检	153	104	20	21	5.00	66.50	277.80	4.60	2.53	24	1.10	2.92
曹菊兰	1	85	6.05	85	152	65	194	99	21	27	7.10	81.20	358.90	5.00	1.39	19	1.35	2.89
马金婵	1	83	7.04	94	145	48.4	172	82	7	14	3.72	59.30	366.00	5.21	1.09	13	1.41	3.25
杨淑英	1	83	5.35	80	弃检	弃检	169	75	17	22	5.80	57.60	251.00	3.50	1.34	21	1.50	1.97
王淑兰	1	81	4.78	78	148	68	150	69	16	25	4.70	53.80	244.90	5.80	0.88	17	1.53	3.62
马慧英	1	84	7.06	83	143.5	57.9	144	47	38	47	8.70	104.30	347.60	3.58	0.82	16	1.35	2.02
王芝美	1	83	4.99	77	154	64.1	144	63	84	70	4.60	49.00	296.00	5.70	1.14	82	1.52	3.71
王秀文	1	82	7.60	84	149.5	79.1	191	98	15	19	5.70	56.40	221.90	5.72	1.04	29	1.57	3.47
张翠兰	1	81	4.56	84	152	66	119	82	10	16	7.90	90.20	398.40	4.77	1.29	19	0.99	3.20
谭纪兰	1	82	6.15	73	158	64.2	170	78	23	29	7.30	56.70	262.30	4.79	1.38	33	1.39	2.97
刘继英	1	83	6.01	88	155	51.7	166	79	12	29	8.11	61.00	313.70	4.67	1.29	20	1.74	2.75
周友芝	1	84	4.31	59	151	48.3	128	71	16	21	4.85	53.20	352.00	3.23	1.04	12	1.24	1.81
陈祥敏	1	83	17.47	65	151.5	58.9	193	101	13	17	3.70	61.00	110.70	3.93	1.06	25	1.65	2.13
马维英	1	86	8.26	68	弃检	弃检	125	81	20	21	5.30	51.60	333.60	4.94	1.84	18	0.97	3.28
徐继英	1	80	5.87	72	154.5	37.3	217	85	9	23	7.90	68.70	320.00	4.97	0.70	14	1.10	3.29
宋效敏	1	87	4.85	71	159	63.2	148	59	9	18	6.30	68.40	294.20	3.54	2.25	18	1.01	2.11
徐敬怡	1	87	7.40	90	156	69.1	152	62	18	27	5.26	53.10	365.90	5.89	2.34	16	1.29	3.83
吴瑞明	1	89	4.54	67	154	63.2	173	83	22	26	5.30	65.90	302.50	4.65	2.42	27	1.29	2.62
刘月华	1	91	6.04	77	145	48.9	171	68	15	29	4.70	62.60	240.30	8.22	1.12	18	2.75	4.31
朱瑞香	1	89	5.15	74	157	59.2	146	88	32	27	7.07	44.20	250.40	6.48	0.79	28	2.06	4.17
田淑勤	1	89	4.42	86	130	68.9	112	62	15	32	9.59	109.50	345.50	3.52	0.71	16	1.63	1.68
范秀英	1	81	13.41	93	150.5	72.5	165	83	12	17	9.20	67.90	395.40	4.79	1.57	17	0.95	3.14
王影	1	83	4.95	90	154.5	44.6	172	89	17	22	5.40	44.70	285.30	4.89	1.18	15	1.66	2.94
张容华	1	87	4.70	59	145	41.8	159	66	13	30	7.60	61.50	352.00	4.50	0.83	10	1.56	2.74
郭红心	1	57	4.97	87	169.5	63	137	80	29	31	4.77	57.60	241.00	5.65	0.74	11	1.75	3.65
秦蕴	1	60	5.22	74	156.5	57.5	144	82	17	27	3.60	46.60	264.90	3.46	1.92	15	1.04	2.08
邢美荣	1	60	4.89	66	160.5	51.9	128	74	12	23	4.60	52.10	216.50	9.23	1.14	15	2.32	5.89
展红旗	1	59	4.96	67	157	63.4	147	90	31	43	4.80	61.90	234.00	6.50	0.90	18	2.10	4.04
孟献兰	1	59	4.84	70	155.5	70.5	152	92	25	26	4.38	49.70	203.50	4.88	0.84	21	1.69	2.89
刘静	1	52	5.16	67	162	53.9	132	77	21	25	5.25	54.30	343.00	7.32	2.21	17	1.59	5.09
吴立影	1	54	6.00	77	157	57.8	118	70	16	20	6.50	61.60	224.10	4.16	1.54	14	1.39	2.36
张永侠	1	54	5.06	87	163	55.5	123	72	20	20	5.80	55.10	331.60	6.29	1.43	36	1.52	3.91
王彩侠	1	56	4.96	71	155	55	128	89	22	23	4.50	41.10	258.90	6.38	1.09	18	1.83	3.99
李素英	1	53	4.69	73	157	54	143	63	16	22	6.60	62.40	311.80	5.37	1.16	12	1.78	3.32
赵红芝	1	59	6.66	75	150.5	63.8	144	87	30	26	5.10	45.80	370.90	4.04	1.98	53	0.94	2.78
陈明辉	1	59	6.56	76	156	60.5	128	82	17	21	5.67	51.10	196.30	5.52	1.22	13	1.36	3.20
侯学琴	1	60	6.89	92	164	64.3	145	69	23	24	5.00	43.70	267.90	5.27	2.27	36	1.37	3.05
赵玉勤	1	61	5.03	78	158	67.4	147	93	53	40	5.40	49.70	290.50	6.32	1.00	30	1.64	3.84
张冰	1	60	9.40	95	167.5	77.6	142	73	49	52	6.19	74.80	438.60	5.45	2.51	89	0.96	3.75
郭丽敏	1	58	5.28	67	161	52.8	107	68	15	19	6.00	47.00	256.40	6.24	1.25	21	1.51	3.79
陈五凤	1	60	6.31	88	160	74.2	141	78	25	22	3.60	49.40	261.10	3.72	2.19	20	1.02	2.12
丁秀枝	1	57	4.56	93	161	62	159	107	26	33	5.90	52.00	238.60	5.52	1.00	12	1.87	2.96
吴琪	1	59	4.94	66	168.5	61.2	129	74	32	33	3.10	45.10	264.10	6.14	0.79	36	1.96	4.15
闫丽华	1	61	5.68	86	153.5	62.9	145	77	15	24	5.00	52.40	284.40	5.68	1.10	15	1.88	3.41
董文侠	1	57	5.32	68	157.5	55.5	124	78	19	24	6.83	61.10	357.40	4.17	0.95	19	1.30	2.56
周淑兰	1	57	5.05	72	163.5	56.1	147	96	17	27	3.68	57.40	346.90	5.47	2.07	14	1.27	3.67
周振侠	1	67	5.84	70	160	58.6	138	87	16	20	3.40	64.00	281.90	4.93	1.02	29	1.95	2.85
李芝	1	59	4.74	75	148.5	53.3	118	53	30	31	5.00	60.30	249.40	6.51	0.90	45	1.86	4.14
靳红心	1	56	4.57	71	160	64.6	143	93	14	16	4.30	43.40	271.80	3.59	0.66	15	1.23	2.17
汝可美	1	56	4.66	78	弃检	弃检	121	77	15	20	5.20	58.90	252.20	6.36	2.77	28	1.38	4.31
蒋艳丽	1	56	4.47	75	167	72.4	145	90	23	27	5.93	66.70	300.00	4.87	0.60	18	1.92	2.84
许钰	1	56	5.69	78	169.5	72	148	82	46	29	4.40	53.00	261.90	6.26	1.51	24	1.49	3.68
李影	1	56	4.68	81	弃检	弃检	137	87	58	51	3.87	41.80	212.30	3.47	0.49	34	1.50	1.88
周静	1	60	4.93	92	163	56.7	115	81	21	26	5.35	47.20	297.00	4.12	1.35	25	1.19	2.76
黄继红	1	55	4.52	73	152.5	48.5	102	61	19	26	5.05	45.40	235.30	5.36	1.14	30	1.73	3.15
郝亚梅	1	55	5.44	63	163	73.3	155	99	33	22	5.40	55.00	297.40	4.97	1.02	27	1.28	3.35
李俊	1	60	5.38	74	164.5	55.4	126	69	14	19	4.00	57.20	227.70	5.57	0.65	14	1.91	3.41
李淑侠	1	55	5.13	71	154.5	62.5	149	94	15	23	3.50	54.10	201.70	4.27	1.01	12	1.80	2.34
白先勤	1	61	4.97	76	153	57.9	148	93	18	24	4.98	52.90	325.30	3.92	2.77	12	0.95	2.46
赵敏	1	57	8.15	84	160.5	56.5	138	88	38	26	5.63	30.80	130.00	6.04	3.15	102	1.14	3.98
梁琪	1	61	6.61	81	159	71.5	117	74	11	18	6.34	44.50	354.00	6.96	1.08	21	1.63	4.95
修功侠	1	61	6.74	84	150.5	57.8	121	60	28	29	2.70	46.20	169.00	2.94	0.92	22	1.22	1.63
郝修俭	1	61	4.34	101	158.5	80.1	169	82	31	31	4.40	49.60	298.70	5.22	2.04	25	1.21	3.46
姜淑勤	1	58	5.13	68	164	73.7	171	89	18	21	6.30	56.10	249.10	3.76	1.20	20	1.33	2.11
钱艳华	1	58	5.64	61	163.5	61.5	105	81	20	25	3.90	55.20	202.90	6.00	1.15	22	1.40	3.59
胡素玲	1	69	4.88	87	150.5	58.8	174	104	15	23	4.89	54.20	340.40	3.90	1.44	17	1.13	2.46
齐淑芳	1	61	6.75	83	154.5	57.6	139	77	14	14	7.00	61.80	366.50	3.51	1.57	19	1.35	1.98
王爱琴	1	70	3.61	83	150.5	78.2	134	79	24	28	6.64	69.10	350.20	5.45	1.85	22	1.64	3.31
薛红霞	1	76	6.13	66	155	56.7	195	83	10	19	5.70	73.90	293.60	4.10	1.01	25	1.88	2.01
闫玉琴	1	61	5.58	106	157	55	158	67	17	22	4.58	60.30	283.70	6.62	2.02	29	1.47	4.44
杨银英	1	61	5.82	107	161	64.6	150	89	21	25	4.85	46.40	150.30	4.71	1.26	31	1.21	3.10
周敬	1	61	9.96	89	159.5	55.2	130	71	24	22	5.80	36.90	313.60	2.41	3.07	48	0.69	1.41
于敏	1	60	5.02	83	159.5	63.2	164	84	17	26	6.00	58.50	291.50	7.66	1.64	21	1.70	5.55
闫玉华	1	60	4.21	79	153.5	51.1	142	88	33	31	4.88	54.80	291.30	4.01	1.32	23	1.26	2.44
田学影	1	62	11.21	72	157.5	59.7	122	69	17	19	7.60	58.00	273.10	5.50	3.21	47	0.87	3.66
徐芳	1	60	5.38	91	152.5	60.6	159	96	19	28	6.60	55.40	384.60	4.55	0.65	51	1.45	2.93
刘伟	1	58	3.82	77	168	62	141	77	11	19	6.45	59.40	234.10	3.98	0.34	16	1.05	2.57
薛丽华	1	59	4.48	85	152.5	51.4	125	73	22	30	5.60	51.30	211.40	4.02	0.69	17	1.71	2.31
赵玉娥	1	62	6.11	95	151.5	57.9	143	94	58	55	5.70	37.80	313.30	5.61	1.39	50	1.52	3.29
朱莉华	1	56	4.93	70	152.5	54.6	111	65	16	20	5.90	37.80	231.80	6.24	1.23	29	1.40	3.91
赵新玲	1	66	5.33	94	159.5	62	173	104	15	27	12.32	246.30	403.80	5.65	3.45	23	1.32	3.56
姜利平	1	59	5.02	80	158.5	46.4	111	65	10	22	6.10	48.20	214.20	5.64	0.81	12	1.58	3.18
焦升荣	1	58	5.07	64	160	60.9	141	82	19	26	5.30	56.10	231.10	4.20	0.63	17	1.50	2.53
殷晓云	1	56	8.74	80	153	69.6	185	94	36	27	5.19	42.90	323.90	3.93	2.06	35	1.20	2.31
刘会侠	1	62	7.13	85	160	72.3	163	85	28	31	4.64	49.40	299.30	6.12	1.24	66	1.59	3.86
陈雁	1	58	5.31	87	162	63.6	152	98	24	22	5.30	48.40	235.60	6.85	1.68	65	1.51	4.56
朱琳	1	55	4.83	87	156.5	66.1	160	93	22	25	6.70	50.30	360.40	5.45	1.09	21	1.40	3.78
姜冬梅	1	54	4.31	76	167	72.8	106	72	9	24	6.40	80.30	325.70	7.05	1.56	14	1.81	4.30
周侠	1	53	5.36	71	163	66.1	152	85	12	19	7.00	48.90	240.60	5.41	0.63	11	1.76	3.41
张会娟	1	53	5.65	105	153.5	53.3	124	79	29	27	4.10	56.60	294.30	5.17	1.53	17	1.64	3.21
郝晶琼	1	58	4.97	62	161.5	59.9	133	82	22	26	5.80	64.50	231.50	7.26	2.24	31	1.61	4.94
冯丽	1	53	5.71	77	161.5	60.5	109	69	11	22	6.50	57.70	274.20	5.71	0.72	13	1.87	3.16
邢自芳	1	69	5.08	103	155	61	159	82	38	47	4.31	62.40	306.20	3.77	1.69	34	1.06	2.25
张玉玲	1	52	5.20	67	159	69.4	169	104	21	24	4.73	52.00	174.50	7.34	2.16	17	1.80	4.64
李霞	1	57	4.76	45	166	68.4	122	81	17	18	3.80	52.00	235.40	3.60	1.38	12	1.03	2.19
汪东莉	1	57	4.95	75	165	66.6	140	87	33	26	6.81	77.10	446.80	6.13	1.46	45	1.82	3.91
闫素芹	1	56	5.23	82	156	54.5	139	81	43	45	4.40	49.20	190.10	5.04	2.71	53	1.10	2.88
陈影	1	51	5.34	87	159.5	62.5	141	77	30	30	3.70	51.70	249.10	5.49	1.52	38	1.44	3.41
李光篮	1	56	5.20	88	157.5	62.6	156	92	16	19	4.59	44.60	328.90	4.80	1.95	20	1.07	3.38
文芳	1	50	4.47	82	161	59.6	120	70	25	30	2.96	53.00	245.90	5.15	0.75	12	1.87	3.07
王纪	1	55	7.68	73	151	56.7	135	75	23	22	4.78	47.50	315.50	6.26	1.48	22	1.62	4.34
郭丽萍	1	55	4.66	79	170.5	68.8	138	90	52	53	4.11	54.70	305.20	4.78	0.80	60	1.68	3.09
李英姿	1	55	5.85	91	163.5	66.3	160	106	37	24	5.40	42.00	365.50	7.21	3.17	51	1.51	4.94
李卫萍	1	55	5.38	78	157	71.7	134	82	30	25	6.80	46.00	260.00	5.27	1.54	26	1.47	3.15
郭砚侠	1	58	4.73	80	166.5	62.9	113	73	14	22	5.30	59.30	362.90	6.00	0.71	17	1.59	3.91
李冬梅	1	55	4.37	74	160	58.3	140	87	36	29	5.50	50.00	306.70	4.18	1.52	39	1.66	2.28
陈冬梅	1	53	5.11	71	161	59.3	105	67	304	146	5.60	61.70	310.00	3.30	0.75	40	1.30	1.86
徐志勇	2	58	4.87	68	170	80.1	159	98	38	53	4.63	87.30	460.60	6.10	3.64	137	1.67	3.63
范伟	2	56	5.98	75	180	79.1	130	88	20	18	5.66	62.90	368.30	4.59	1.86	26	1.12	2.60
任亚坤	2	51	4.94	77	163	60	109	79	27	26	4.76	74.90	326.50	6.01	0.79	26	1.71	3.90
魏依诗	1	38	5.03	77	167	53.3	125	79	16	18	3.90	55.30	239.20	5.19	1.16	13	1.66	3.07
张莉	1	36	5.09	76	165	55.5	111	67	11	15	6.80	51.80	221.60	4.66	0.83	10	1.47	2.98
闫锋	2	56	5.86	84	170	76.4	159	100	28	31	5.86	51.20	345.80	6.16	13.50	547	1.02	2.67
赵新军	2	58	5.86	73	178.5	96.5	145	83	38	36	4.90	56.00	231.00	3.52	3.48	32	0.73	2.31
魏明	2	50	6.30	74	171	63	143	93	28	45	3.94	75.20	299.60	5.50	0.94	62	2.84	2.49
吴岩岩	1	36	3.69	74	168	50.9	97	69	12	20	4.68	45.40	247.70	3.93	0.93	10	1.45	2.13
张夔	2	36	5.66	87	161.5	72.7	126	75	13	20	6.30	87.00	360.80	6.31	2.13	18	1.10	4.57
丁建伟	2	52	6.72	70	175	84	146	87	7	16	3.50	59.30	261.90	4.53	1.92	13	1.20	2.88
张高峰	2	37	5.67	76	171.5	71.7	127	85	49	35	4.20	54.20	384.90	4.13	2.67	121	1.25	2.50
郭鹏	2	29	4.61	67	179	74.8	120	80	16	24	4.50	79.10	376.10	4.38	0.78	14	1.25	2.76
张银峰	2	43	5.08	87	173	78.6	119	70	65	39	6.06	74.20	327.00	6.68	5.53	54	1.39	4.21
王伟	2	26	4.82	76	190	88.9	130	72	15	部分胸腰椎体缘许莫氏结节形成；腰2/3、腰4/5椎间盘膨出，腰5/骶1椎间盘突出（这（左侧旁型）并左侧脊神经根受压；考虑部分椎小关节间隙积液及周围滑膜囊肿形成；骶尾部皮下软组织少许渗出。	5.20	74.60	401.00	4.48	1.59	11	1.00	2.93
闫文霞	1	47	4.67	78	158.5	52.2	121	77	19	25	4.50	42.30	236.90	5.05	1.90	13	1.25	3.37
赵炳鑫	2	55	4.17	65	154	47.5	142	68	10	23	6.23	53.30	208.70	4.85	0.84	15	1.68	2.84
吴柯	1	52	4.41	71	158.5	48.8	90	65	29	39	5.30	51.90	203.60	5.62	0.67	20	2.22	3.24
张梅	1	51	5.06	74	153.5	52.2	123	71	28	25	6.83	54.00	313.70	5.57	1.19	30	1.58	3.44
唐林	2	58	8.51	89	169	67.1	138	88	38	29	10.22	74.60	264.80	2.82	0.78	31	0.74	1.89
钱静静	1	39	4.81	85	165.5	54.8	99	69	11	17	6.00	63.00	360.00	5.55	0.73	14	1.33	3.86
闫时雨	1	29	5.82	79	弃检	弃检	120	84	16	15	3.30	54.90	435.80	6.82	2.17	22	1.36	4.53
金雨	1	34	4.11	83	171.5	62.2	108	78	11	18	4.08	39.30	265.50	4.32	1.00	10	1.19	2.73
张琛	2	27	4.75	83	180.5	74.9	125	82	61	27	4.42	59.50	519.60	4.88	2.47	62	1.06	2.87
胡忠慧	1	43	5.40	78	160	60.1	149	82	10	20	5.90	64.80	225.50	6.09	1.21	10	1.61	3.87
曹馨允	1	30	4.89	80	164	53	125	75	11	17	4.50	49.70	323.10	4.53	1.41	11	1.23	2.84
程亚艳	1	49	4.65	76	153.5	57.3	117	77	25	27	4.73	44.10	182.80	7.91	0.94	17	1.66	5.39
袁云霞	1	47	5.16	76	160.5	58.8	111	83	45	36	6.80	56.90	296.00	6.09	0.63	56	2.09	3.72
冯坚	2	42	5.49	69	168	80.5	113	67	15	17	5.21	81.20	556.60	3.78	2.72	35	0.89	2.39
肖龙泉	2	51	5.44	73	178	54.7	113	78	15	20	6.10	70.70	353.20	4.71	0.91	32	1.97	2.65
陈朦	1	33	5.13	82	156	50.1	85	61	13	18	6.39	57.00	334.50	5.18	0.87	11	1.90	3.03
鲁宁	1	45	5.75	81	162.5	68.5	117	74	14	20	4.03	44.70	263.90	6.00	0.74	26	1.63	3.87
宋贤芳	1	39	4.26	81	160	64.2	122	67	12	18	5.00	55.50	209.30	5.01	0.85	12	1.28	3.41
王晓梅	1	54	4.36	76	162.5	58.5	132	75	13	20	4.66	57.50	269.90	5.28	1.24	13	1.44	3.47
庞艳华	1	50	4.87	80	158.5	56.4	97	56	13	19	3.73	54.20	199.10	5.78	0.96	14	1.83	3.89
张飘	1	31	4.00	80	164	54.9	119	71	14	18	2.60	45.40	284.20	5.27	1.10	13	1.41	3.13
梁痛快	2	30	5.10	101	172	79	132	79	28	21	3.50	70.70	349.50	5.03	1.64	39	1.44	3.03
柴亚光	2	32	4.25	70	172	80.1	133	83	13	21	4.25	70.30	327.30	4.37	0.57	16	1.38	2.90
王静静	1	37	4.92	88	163	66	127	83	10	17	5.20	60.80	385.90	4.61	0.80	11	1.48	2.76
赵威	2	42	5.73	76	175	70.4	125	77	30	18	7.10	65.90	319.30	5.62	1.24	30	1.43	3.13
杨树森	2	58	8.44	77	165.5	75.1	120	79	19	20	5.40	64.00	325.80	5.87	1.40	22	1.10	4.13
陈东翼	1	54	5.83	78	165	75	135	85	24	25	3.02	46.80	280.90	6.05	1.92	37	1.76	3.88
夏宇	1	32	4.52	98	164.5	56.8	125	81	12	15	5.40	55.90	303.10	5.76	0.74	18	1.77	3.79
夏雨晴	1	33	4.98	81	167.5	57.5	118	74	11	18	4.20	52.10	234.50	4.43	0.65	11	1.58	2.77
徐冰薇	1	31	5.38	65	157	48.1	109	67	10	21	3.30	47.30	190.20	3.01	0.59	11	1.29	1.69
王闪闪	1	32	5.20	87	159.5	61	106	73	11	12	6.90	48.30	273.10	5.28	0.68	17	1.40	3.44
赵硕	2	31	4.70	81	186	78.8	127	79	14	22	4.40	60.20	417.00	3.83	1.12	13	1.07	2.45
黄劲松	2	53	4.72	67	169	77.8	156	94	40	32	6.73	70.70	411.80	4.97	1.11	38	1.31	3.34
于晓燕	1	42	6.09	71	170.5	74	132	78	36	22	5.70	61.90	255.90	6.15	1.41	42	2.01	3.65
胡兴祥	2	36	4.56	78	168.5	49.9	110	72	18	22	3.80	70.30	313.20	5.30	0.75	17	1.57	3.40
杨建峰	2	42	5.66	80	163	71.3	134	88	40	25	4.50	68.60	531.60	4.63	1.84	34	1.19	3.10
蔡文静	1	37	4.63	75	165	54.1	111	69	9	16	3.70	51.90	235.70	4.76	0.86	13	1.72	2.87
陈亚男	1	34	6.53	71	158.5	63.6	121	76	20	23	4.70	41.00	245.80	2.80	1.27	22	1.15	1.56
李东鹏	2	40	4.87	106	168	104.4	132	95	34	24	5.14	72.20	294.30	5.39	1.68	51	1.21	3.63
李明	2	33	4.79	100	169	70.5	143	80	14	16	4.80	60.30	355.00	5.60	1.53	19	1.15	3.88
李新杰	2	43	5.28	74	178	82.1	140	93	13	21	4.79	80.50	339.30	5.08	1.45	32	1.41	3.21
孔绘敏	1	36	5.38	77	171.5	70.9	116	67	34	69	5.07	57.50	280.80	4.39	1.06	52	1.31	2.45
闻艳丽	1	40	5.34	79	160	63	150	90	13	20	3.20	49.90	253.20	4.48	1.74	27	0.95	2.90
李婷	1	35	4.84	84	163	61.6	96	63	16	23	4.56	59.60	255.80	5.28	0.73	16	1.33	3.43
李娜	1	41	4.66	61	157	54.8	115	70	8	20	2.90	45.00	232.20	4.78	0.55	10	1.52	2.87
马春艳	1	31	5.13	86	155	63.9	114	74	19	19	3.90	41.10	167.50	4.27	0.66	25	1.42	2.31
王曼	1	37	5.11	88	165	60.2	123	84	14	19	4.40	47.40	242.20	5.03	0.65	24	1.43	2.88
王艳	1	37	4.28	81	157.5	52.2	118	77	22	28	4.47	53.60	347.40	4.37	1.57	48	1.11	2.92
陈齐	1	31	4.37	81	169	65.9	114	77	13	19	3.31	46.70	233.50	3.40	0.49	12	1.34	1.92
李娜	1	36	5.08	80	160	64.3	107	63	10	16	4.20	47.70	234.00	4.69	0.63	21	1.78	2.48
闫晗	1	32	4.98	84	166.5	58.5	125	78	24	23	3.36	53.50	291.20	4.65	1.37	18	1.36	2.96
杨梦云	1	33	5.00	90	170	65	116	69	16	23	2.52	45.50	273.00	4.94	1.15	14	1.25	3.28
王旭	2	34	4.87	65	192	94.1	120	75	17	19	5.60	67.20	358.90	5.09	0.98	24	1.21	3.47
吴芳芳	1	32	4.79	64	170	65.6	98	60	16	35	4.70	64.40	292.90	5.05	0.43	14	1.55	3.31
李云峰	2	31	6.30	101	165.5	66.7	123	73	22	23	5.70	67.50	358.60	5.02	1.44	39	1.19	3.48
甘孟孟	1	31	5.13	98	167.5	89.2	130	82	63	33	4.20	60.80	404.80	4.57	0.78	15	1.34	2.65
周欢欢	1	40	4.95	74	165	57.7	121	75	14	21	5.60	43.90	218.90	5.23	0.66	11	2.13	2.78
刘春节	1	46	3.76	72	161	65.5	135	76	14	17	3.40	54.30	271.80	5.58	0.67	14	1.64	3.27
王静	1	45	4.33	81	161	51.3	130	83	21	28	4.51	51.60	254.80	4.99	0.78	19	1.78	2.91
魏品品	1	37	4.75	80	157	56.6	134	93	45	40	4.32	44.30	325.90	4.50	1.62	32	1.21	2.85
尹春萌	2	40	5.10	75	178.5	85.1	113	76	35	36	4.53	70.10	545.20	5.53	1.99	31	1.46	4.00
窦鹏程	2	40	5.66	88	弃检	弃检	134	88	40	23	5.40	69.30	379.30	6.47	2.02	39	1.45	4.46
刘东升	2	36	6.26	67	179	82.3	125	80	44	43	5.44	67.20	336.40	6.05	1.58	81	1.70	3.76
闫娜娜	1	34	4.40	70	163.5	56.7	98	50	12	17	4.10	50.30	221.50	3.66	0.50	14	1.29	2.24
刘金介	2	53	5.01	96	180.5	72.3	168	107	18	21	5.50	78.20	348.30	6.17	1.11	19	1.81	3.89
王甫	2	55	5.62	77	170	69	120	80	21	23	4.60	63.90	452.50	4.77	1.40	31	1.20	3.05
尹辉	2	43	4.73	106	168	78.3	142	113	62	85	4.80	66.70	271.10	4.00	2.54	68	1.10	2.59
葛亚藤	1	37	4.91	74	157.5	64.6	110	77	12	17	5.00	63.10	305.50	5.47	2.18	12	1.18	3.71
陈泽瑾	1	35	4.56	81	162.5	63.2	115	70	11	18	5.00	52.70	171.70	3.59	0.43	11	1.25	2.11
康亚茹	1	31	5.02	83	165	100	125	79	14	12	4.73	49.70	397.20	5.86	2.56	25	1.09	3.72
张瑞	1	32	4.99	99	171.5	54.2	123	86	13	19	3.15	48.80	166.00	3.16	0.77	10	1.63	1.54
邵赛	1	35	5.35	77	173	69.1	131	74	14	21	5.80	60.50	362.90	4.81	1.28	18	0.95	3.36
陈恪	2	40	5.13	89	174.5	83.3	138	81	58	37	3.20	65.90	338.80	4.52	1.90	97	1.36	2.71
李霁玮	1	34	4.81	77	163.5	49.1	133	82	16	19	5.50	47.30	228.80	4.74	0.67	30	1.58	2.90
周璇	1	37	5.32	82	158	63.8	116	81	14	13	2.30	50.30	274.90	3.92	0.90	24	1.31	2.38
郑亚南	1	36	6.23	98	166.5	64.8	111	75	16	16	2.70	40.00	263.00	4.68	1.00	16	0.89	3.01
刘家才	2	58	5.06	70	172.5	67.3	153	92	16	23	4.50	64.40	277.80	5.37	0.87	17	1.27	3.45
洪璞	1	41	4.94	90	158	62.4	135	87	10	22	4.38	53.30	333.70	6.42	0.81	9	1.90	3.39
孙婵娟	1	43	4.76	89	160.5	53.1	101	68	13	16	4.04	51.80	214.70	4.22	0.65	12	1.62	2.37
顾亚利	1	30	5.07	57	156	60	142	80	17	19	6.84	55.90	239.10	5.48	1.69	20	1.64	3.43
蔡晓兰	1	46	5.55	73	156.5	62.4	167	104	16	22	4.48	55.50	398.20	5.25	1.28	19	1.21	3.48
李百合	1	32	4.96	85	164.5	51.9	112	66	11	16	6.77	56.20	349.00	4.89	0.85	16	1.60	3.03
赵影	1	40	4.65	81	159.5	51.1	119	75	19	19	3.30	42.60	184.50	4.44	0.80	29	1.66	2.72
赵珍珍	1	43	5.07	71	165	70.3	116	82	13	17	4.47	66.50	222.10	5.32	2.03	24	1.37	3.33
张红	1	43	6.67	99	159	61.4	175	99	26	24	4.83	49.40	322.80	5.37	1.53	22	1.33	3.61
怀宁	1	35	5.04	80	159.5	51.9	115	77	14	19	4.20	41.60	188.50	3.04	0.56	12	1.16	1.73
穆睿	1	34	5.23	95	160.5	70.4	114	73	16	18	3.30	48.20	286.90	6.05	0.96	13	1.38	4.04
海洋	2	29	3.93	59	177	60.4	147	86	13	17	6.37	68.30	402.80	5.01	1.89	33	1.97	2.51
王孟炜	2	34	3.08	73	180	73	111	76	13	26	7.24	78.50	462.30	5.11	0.80	17	1.90	3.21
翟玉琴	1	46	5.32	84	152.5	59.8	143	90	22	19	4.30	44.20	313.00	6.47	2.89	43	1.20	4.59
李红霞	1	50	4.31	72	160.5	55.3	121	68	11	18	3.30	60.30	229.50	5.07	0.59	17	1.65	2.70
李朋	2	32	4.77	85	176.5	72.7	126	64	55	28	6.04	82.00	438.60	5.26	4.24	47	1.02	3.37
闻梦晴	1	21	4.20	93	158	59.8	121	72	15	21	3.30	45.90	321.10	4.85	0.85	13	1.41	3.05
岳慧	1	25	5.02	84	167.5	51.1	101	55	16	20	5.58	42.90	202.90	4.40	0.89	11	1.79	2.36
万德余	2	39	5.94	73	175	83	120	73	31	23	4.40	63.60	315.50	4.99	1.41	26	1.05	3.37
张伟	2	47	12.01	90	174	86.4	142	90	23	28	6.10	119.80	343.10	6.17	2.30	54	0.94	4.29
王辞山	2	40	5.13	78	180	68.6	122	80	17	21	5.20	72.50	215.20	3.79	0.62	20	1.29	2.39
张玉芬	1	39	4.24	82	162	52.6	101	65	10	15	5.62	42.10	256.60	3.90	0.93	12	1.33	2.40
梁西俊	2	59	5.37	77	168.5	71.5	146	92	11	19	4.90	63.80	359.90	5.44	0.59	19	1.40	3.32
常宇	1	25	4.93	90	153.5	48.9	111	80	16	23	2.90	53.50	235.60	4.02	0.86	14	1.52	2.30
宋财	2	50	5.49	80	173.5	86.2	126	82	21	21	5.20	69.60	391.00	4.55	1.47	37	1.31	2.85
柴雷子	2	36	4.98	82	176	79	149	103	28	28	3.95	64.00	361.10	4.92	2.21	35	1.05	3.14
张慢	1	37	4.22	109	167.5	53.1	114	67	15	21	4.69	52.00	264.60	4.22	0.45	12	1.74	2.34
赵思佳	1	31	5.63	81	162.5	54.6	115	72	11	16	2.80	54.80	208.60	5.16	0.89	13	1.23	3.22
鹿稳稳	1	26	4.99	75	157	54.1	107	60	6	14	4.69	49.40	201.90	3.31	0.69	9	1.15	1.95
惠作林	2	36	5.24	62	167	97.9	164	102	24	30	6.86	72.60	428.80	4.30	1.61	20	1.04	2.88
王坤	2	39	6.03	82	165.5	78.6	138	94	49	30	5.98	64.80	427.20	4.03	1.36	75	1.03	2.71
洪源	2	47	4.95	69	179	72.2	107	76	12	19	5.30	69.00	301.60	6.11	1.14	15	1.43	3.90
王靖	1	47	5.09	68	165.5	53.9	91	48	14	18	5.10	62.50	238.50	5.55	0.55	11	1.75	3.22
张妮	1	44	5.92	90	161.5	61.7	101	62	28	31	3.80	46.10	199.20	3.41	1.22	18	1.18	1.98
孟智远	1	42	4.94	80	166.5	57.9	109	68	18	23	4.00	53.10	219.80	5.80	0.55	15	1.92	3.52
刘鑫	1	46	4.50	77	151.5	49.3	126	58	17	26	4.98	67.10	229.80	5.29	0.46	10	1.63	3.48
黄明辉	2	31	5.47	82	171	69.9	135	76	30	21	4.30	57.40	495.20	4.81	3.94	37	1.13	3.04
邢正	2	30	5.12	82	174	62.8	122	78	25	22	4.55	72.90	341.80	4.36	1.02	40	1.22	2.81
朱海勤	1	31	4.16	67	161.5	56.7	97	62	39	29	4.86	58.40	307.20	5.01	1.09	18	1.56	3.05
程川	2	32	5.50	87	173	76.2	138	87	64	28	4.50	66.10	374.50	5.50	0.85	33	1.54	3.31
韩慧	1	28	5.86	89	159.5	61.5	119	80	11	18	6.40	49.60	286.80	5.24	0.49	16	1.55	3.23
葛梦瑶	1	24	4.34	73	153	47.9	126	83	16	18	5.60	45.90	221.60	5.13	0.41	13	2.18	2.84
周洁菡	1	26	5.38	69	168.5	66.8	111	79	15	17	2.30	56.90	316.10	6.03	1.66	15	0.98	4.07
朱红	1	28	5.21	81	170	61	106	60	12	17	5.93	48.60	272.60	4.33	0.59	16	1.76	2.40
谢家慧	1	27	4.54	68	163.5	61.1	132	64	13	18	3.80	46.70	255.40	7.01	6.71	14	1.08	3.97
路滕滕	1	27	5.31	82	165	55.7	112	72	18	22	4.10	52.70	240.00	5.69	0.98	11	2.10	2.91
陆希希	1	33	4.92	82	166	94	114	78	11	13	3.21	41.70	355.50	7.04	1.56	13	1.28	4.88
黄坤	2	29	4.63	83	171.5	74.7	138	86	18	21	6.40	66.50	402.00	3.40	1.67	29	0.90	2.25
陈冰	1	35	5.48	96	160.5	64.7	133	94	14	16	7.10	52.50	271.90	6.40	0.68	14	1.92	4.19
李瑞	1	32	5.16	82	165	62.3	127	79	15	17	4.26	43.30	296.70	3.55	1.32	15	1.17	2.30
朱朝阳	2	30	5.81	62	174	79.5	120	77	27	21	4.40	64.40	353.80	6.17	1.73	48	1.26	4.16
徐艳丽	1	46	5.60	79	166	83.1	117	71	26	30	4.30	46.60	303.20	5.95	1.09	36	1.47	3.89
刘瑞	1	33	4.98	76	162	82.8	148	92	15	18	4.10	59.20	330.40	5.46	2.22	17	1.44	3.45
王丹	1	43	5.41	83	160.5	75.7	108	70	28	20	4.60	51.90	236.70	4.49	1.67	22	0.88	3.09
王瑞芳	1	45	4.25	85	164	54	103	59	17	19	5.55	56.40	266.90	6.51	0.68	14	1.73	4.48
滕丽	1	42	5.66	102	163	65.9	118	67	6	22	3.17	52.60	253.90	5.17	0.98	13	1.75	颈椎退行性变；C3/4、C4/5、C5/6椎间盘突出（中央型），C6/7椎间盘突出（右侧旁中央型），局部椎管狭窄。
李培培	1	34	5.33	79	155.5	67.2	168	97	18	22	4.45	43.20	277.10	7.21	1.18	19	1.60	5.17
单荣英	1	35	4.96	68	154	69.1	135	69	77	72	4.37	40.30	398.20	6.03	1.99	47	1.71	3.68
孟月月	1	32	4.65	70	157.5	61.7	103	69	25	25	4.62	47.50	340.30	4.83	2.39	19	0.82	3.45
李艳	1	33	5.98	87	165	63	133	87	19	21	3.50	42.80	206.50	5.55	0.73	14	1.43	3.44
付凡巍	2	32	4.60	70	175	72	120	80	16	25	4.85	68.30	471.50	4.90	0.77	20	1.18	3.24
茹利	1	33	4.53	82	弃检	弃检	131	80	17	14	4.00	52.90	321.60	3.89	0.87	23	1.12	2.49
丁兰草	1	26	4.73	90	161	51.8	118	86	7	15	5.00	51.70	211.60	3.60	0.51	11	1.61	1.93
高云	1	28	3.87	75	160.5	43	108	68	11	17	3.67	37.60	234.30	4.57	0.55	25	1.64	3.01
冀庆军	2	41	6.13	83	177	91.3	139	92	59	38	6.50	66.50	349.00	5.29	1.02	32	1.23	3.43
何苗	1	40	8.69	93	171.5	72.9	160	89	39	34	3.70	55.30	276.30	4.96	0.90	35	1.27	3.06
陈岩	1	35	4.47	89	161.5	64.1	130	82	18	16	5.10	54.60	352.60	5.59	1.71	23	1.25	3.48
田园园	1	34	4.86	79	160	60	105	66	23	29	4.46	50.30	263.50	5.22	0.96	13	1.69	2.74
贺莲	1	39	6.77	68	155	52	107	67	10	23	10.00	45.10	304.50	7.10	0.85	20	1.85	4.24
杨瑞丽	1	31	5.24	70	163	59.5	110	60	13	20	3.90	46.00	325.40	5.07	0.87	15	1.55	3.28
崔苗	1	25	5.03	74	170	59.7	127	69	14	17	4.00	53.60	257.20	4.23	0.86	15	1.43	2.67
宋玲	1	56	4.73	108	154	55.9	96	69	18	24	3.61	49.10	290.20	4.53	0.79	14	1.35	3.06
刘正慧	1	47	5.37	93	154	63.2	116	74	32	29	4.00	51.20	284.30	4.77	1.45	54	1.11	3.11
冀凤贞	1	27	4.89	74	164.5	64.5	111	69	10	18	4.30	64.70	263.50	4.92	1.31	11	1.38	3.18
邵晴晴	1	28	5.75	98	158.5	61.9	114	69	12	18	4.10	53.10	282.90	5.80	0.60	17	1.87	3.57
蒋伟	2	32	5.09	72	176.5	82.6	115	68	24	26	4.40	77.60	409.60	4.03	0.84	29	1.11	2.62
张欣欣	1	35	4.30	134	156.5	45.5	121	69	10	17	3.70	49.10	364.50	4.62	0.97	12	1.72	2.75
程松峰	2	35	6.00	63	172	75.6	120	76	20	25	5.40	85.20	359.90	5.22	1.74	23	1.23	2.88
张立	2	47	5.37		175.5	87.7	128	90	29	31	5.10	67.70	371.90	4.81	1.82	59	1.34	3.07
李晓军	1	36	5.95	92	171.5	85.1	125	78	21	16	4.50	59.10	335.50	5.88	2.36	49	1.20	4.00
丁香	1	33	5.17	95	163	52.6	99	64	19	22	4.40	71.10	438.40	6.09	1.43	54	1.30	4.24
马芹	1	33	4.79	64	165	59.2	105	61	9	17	3.30	65.30	333.30	4.57	1.07	8	1.35	3.10
李静	1	30	5.76	87	160	59	111	77	13	22	4.70	51.60	239.50	4.42	0.99	14	1.15	3.01
张同桐	1	34	4.46	88	164.5	56.4	115	69	9	13	3.52	58.20	222.80	3.95	0.82	13	1.24	2.49
王白雪	1	30	4.33	89	157	56.5	112	72	15	17	3.91	40.50	333.80	4.45	1.73	21	1.39	2.80
李风雨	1	27	5.49	96	157.5	50.2	115	79	21	23	5.00	46.00	147.50	3.40	0.60	17	0.98	2.21
孙莉	1	40	4.65	76	159	59.5	128	70	13	21	3.10	52.50	218.00	4.68	1.14	13	1.57	2.77
欧阳永峰	2	38	5.49	83	170	69	125	85	57	27	6.10	61.30	348.70	5.33	1.50	146	1.27	3.52
王玥	1	35	5.65	100	155	50	105	65	22	27	3.40	47.20	352.10	5.41	4.39	22	1.12	3.45
缪青	1	36	4.45	72	165.5	48.4	111	59	26	24	3.50	45.60	187.40	4.52	0.90	13	1.16	2.83
李晨祥	1	37	5.17	71	158.5	61.4	157	86	15	26	5.10	55.80	297.90	6.67	1.14	24	1.61	4.43
杨焕	1	31	4.43	81	157	59.2	105	65	11	17	5.28	46.20	272.40	4.42	1.00	11	1.15	2.97
姜利园	1	26	4.91	89	160.5	49.7	101	57	11	16	5.24	42.90	236.00	3.84	0.49	12	1.42	2.41
孙静	1	35	4.70	90	158.5	82.9	150	108	12	20	4.35	45.60	292.30	4.90	1.00	25	1.24	3.44
程亚运	2	32	6.14	86	172	75.2	136	87	84	33	5.00	52.30	441.30	5.51	1.61	63	1.21	3.81
谭悦	1	32	5.67	77	163	59.4	122	62	14	18	3.80	56.70	248.40	4.79	0.85	13	1.50	2.75
孙丽芳	1	59	4.93	68	163.5	61.9	128	78	32	25	5.20	50.70	218.10	4.19	0.91	21	1.37	2.11
田南南	1	35	5.12	88	弃检	弃检	142	96	17	17	4.50	45.00	238.30	5.51	0.95	18	1.62	3.40
陈素钦	1	40	4.95	69	159.5	63.2	127	84	16	23	6.90	46.40	232.10	3.58	0.67	14	1.37	颈椎退行性变，颈3/4、颈4/5、颈5/6、颈6/7椎间盘突出； 颈3-4层面脊髓变性损伤可能。
蒋林君	1	39	7.66	77	165	66.5	108	71	88	54	4.60	44.40	318.70	5.48	2.07	31	1.22	3.72
于瑞雪	1	36	4.49	92	170	58	116	73	11	17	4.90	42.70	298.90	4.81	0.62	17	1.50	3.00
李艳萍	1	55	4.88	77	158.5	60.7	128	90	28	28	2.60	45.90	250.30	3.58	1.32	19	1.61	1.87
马凌风	2	35	4.78	90	172.5	77	136	93	28	23	5.70	69.10	272.00	5.19	2.18	19	0.99	3.68
李鹏	2	33	5.05	83	176	78.2	130	87	24	25	3.91	63.40	348.30	4.98	1.70	34	1.35	3.12
罗培培	1	30	4.77	94	161	51.1	108	72	11	16	4.60	51.60	221.10	4.39	0.52	10	1.65	2.59
孙修丽	1	41	6.13	79	161	60.5	120	79	54	34	4.59	39.40	286.40	5.58	1.88	44	1.02	3.93
翟璠	1	36	4.76	74	154.5	63.2	111	74	20	26	3.65	48.60	279.80	5.34	1.36	8	1.35	3.52
刘倩	1	35	4.55	80	162.5	61.7	114	63	11	20	3.90	52.60	277.90	5.22	0.61	14	1.59	3.04
朱毛根	1	33	4.57	83	162.5	65.1	107	72	10	16	2.90	40.10	220.00	5.81	1.71	9	1.99	3.48
朱叶勤	1	32	5.27	82	157	53.1	104	66	14	16	5.20	43.90	226.10	6.36	0.73	13	1.38	4.06
吴培培	1	44	5.37	69	152	61.5	130	84	33	32	4.20	54.50	264.90	4.72	0.77	16	1.43	2.68
王蒙蒙	1	33	5.04	96	170.5	58	118	78	12	18	5.80	52.50	249.90	6.90	0.52	18	1.32	4.59
梁宁	1	34	4.68	75	171	61.6	118	73	17	20	3.00	43.40	161.70	3.72	0.94	17	1.70	1.83
范茹瑜	1	33	4.09	101	167.5	61.1	123	88	19	22	3.40	45.90	448.50	6.32	2.10	61	2.32	3.60
田小燕	1	34	5.05	73	158.5	53.1	116	80	16	19	6.20	47.00	368.80	4.52	2.14	18	1.01	2.99
刘志远	2	44	3.90	71	163.5	70.4	122	69	19	31	3.10	58.40	462.40	7.29	2.18	24	1.32	4.59
卢伟	2	40	5.01	76	174.5	97.6	127	84	22	24	4.37	79.60	390.00	5.71	1.09	22	1.24	4.15
路远	2	47	8.01	86	160.5	93.4	128	88	49	31	5.95	78.60	307.30	6.12	5.79	115	1.09	3.87
华小斌	2	40	5.19	67	168.5	60.1	142	72	13	22	6.30	64.40	276.50	4.54	1.48	19	1.37	2.92
张佩君	2	52	4.99	77	173	78.3	118	84	17	22	6.17	61.70	313.80	4.74	1.93	34	0.79	3.37
佘明杰	2	43	5.08	79	173.5	76.7	144	97	37	32	5.30	69.70	373.70	6.66	2.64	58	1.21	4.70
徐永建	2	56	3.39	57	164.5	75.3	118	58	14	19	4.67	63.20	332.80	6.60	1.69	15	1.69	4.55
刘小虎	2	37	4.53	68	169.5	76.6	115	74	19	22	6.21	61.50	311.00	5.13	0.87	11	1.55	3.29
卢正磊	2	40	5.05	82	175.5	74.2	114	67	27	21	5.13	71.30	375.60	4.65	1.07	18	1.08	3.17
黄笑宇	2	36	5.25	67	178.5	76.2	111	90	16	21	7.00	82.10	265.80	6.17	1.11	24	1.42	4.16
邓娇娇	1	27	5.26	75	164	52.4	109	66	9	16	4.90	49.50	235.00	4.75	0.63	9	1.53	3.00
曾晴晴	1	31	4.50	84	153	49.1	121	81	17	27	4.23	55.70	373.20	4.81	1.21	14	1.77	2.86
王苗苗	1	34	4.75	87	160	63	130	68	17	21	4.20	51.00	163.50	4.84	0.79	12	1.35	3.16
杨洁	1	51	4.57	81	164	62.9	101	72	17	22	4.89	51.30	294.80	5.04	0.57	11	1.68	3.06
赵慧	1	26	5.68	84	164	53.5	120	75	11	22	2.80	40.60	195.90	3.99	0.57	11	1.62	2.35
董婉	1	26	4.64	108	176.5	67	113	67	18	26	5.26	58.80	277.20	3.54	0.64	10	1.61	1.92
张媛媛	1	38	5.67	90	161	44.5	135	75	19	30	5.25	45.30	193.90	4.39	0.83	16	1.65	2.07
王硕	2	36	5.18	95	183.5	100.9	164	107	94	40	4.40	64.50	499.70	6.60	2.70	100	1.12	4.57
姚强	2	37	4.44	70	175	92.9	149	95	42	41	3.96	63.20	355.90	3.91	1.03	118	1.33	2.39
王婷婷	1	28	5.00	92	155	44.8	109	71	6	16	7.80	57.60	286.00	3.52	0.67	10	1.40	2.10
段秀丽	1	41	5.17	90	162	56.6	106	69	16	24	5.40	47.40	208.00	6.67	0.68	17	1.51	4.29
李静	1	42	5.57	80	160	70	149	98	20	30	4.48	48.60	272.40	4.44	0.90	10	1.41	3.02
李久源	2	33	4.29	75	170.5	80.4	121	69	25	25	4.70	68.20	387.40	6.71	2.09	39	1.16	4.88
尤琳	2	39	5.20	105	175	67.4	111	67	27	24	6.20	61.00	532.20	5.91	1.76	29	1.41	3.46
李艳	1	42	4.71	85	162	60.5	113	64	18	28	5.00	56.00	270.50	6.20	0.57	17	1.92	3.97
王曼曼	1	34	5.20	80	168	77.8	104	58	31	29	4.15	50.30	238.10	5.12	1.11	55	1.51	2.91
夏胜	2	33	5.34	73	182	87.5	127	84	25	26	5.00	93.60	388.80	6.57	2.86	68	1.38	4.35
李荣	1	34	5.38	80	152	50.4	100	56	11	18	3.60	36.80	228.70	4.06	1.26	16	1.15	2.53
方英磊	2	30	5.31	82	178	83.5	140	84	27	21	3.80	58.80	368.00	5.17	1.03	21	1.40	3.46
华长城	2	41	5.11	70	172	75.6	127	72	43	21	4.50	73.60	303.60	5.20	1.55	96	1.52	3.47
方勇	2	40	5.15	78	169.5	76.7	132	84	15	21	5.40	89.40	332.80	5.36	1.40	19	1.25	3.69
刘冰	2	42	6.39	74	176.5	78	144	95	11	16	6.40	65.30	407.40	5.59	1.60	34	1.36	3.44
赵欢欢	1	28	4.77	98	165	53.6	110	74	9	16	2.30	51.50	196.00	4.60	1.28	14	1.34	2.61
张琪琪	2	36	6.34	98	173.5	90.6	151	108	145	64	6.60	71.30	529.10	5.87	2.66	57	0.94	4.19
李倩倩	1	36	5.11	76	150	49.5	102	75	14	21	4.64	53.30	495.80	3.80	0.48	18	1.47	2.17
袁廷申	2	34	5.25	78	173	73.4	129	74	15	21	4.40	75.60	330.70	5.87	0.87	20	1.41	3.86
丁超	2	33	5.10	71	171	86.4	155	119	58	25	4.10	75.30	288.80	5.28	1.71	28	0.92	3.84
黄润华	2	32	4.89	73	176	73	120	70	22	27	4.80	57.60	303.10	4.61	0.87	21	1.35	2.87
朱勋兵	2	49	5.22	61	178.5	86.6	131	85	20	27	5.40	89.20	411.40	5.70	1.06	21	1.20	3.95
许袁琦	1	36	4.47	100	154	48.3	120	75	10	14	3.41	46.80	230.30	7.55	0.99	12	1.87	5.21
田琦	1	33	4.64	91	168.5	71.2	117	85	11	17	3.73	52.70	186.40	6.57	1.41	15	1.57	4.36
李丽	1	34	4.62	89	152	56.4	106	69	11	16	3.56	46.60	214.40	3.35	1.08	8	1.07	2.06
张翠竹	1	34	5.27	87	157.5	53.9	102	82	14	17	3.60	39.10	249.60	5.84	0.73	16	1.17	3.67
高逸君	1	32	5.00	103	161.5	49.7	128	74	11	17	2.60	39.90	162.10	4.32	0.75	12	1.64	2.49
明引	1	30	5.27	84	160	47.4	127	79	17	20	3.10	47.40	180.20	5.24	1.02	12	1.48	3.22
刘亚楠	1	25	4.94	98	162	55.8	109	68	10	16	3.80	46.00	247.00	5.30	0.74	13	1.86	3.19
赵侠	1	45	4.60	81	152	74.2	121	76	26	19	5.90	58.20	429.60	4.89	1.26	43	0.96	3.35
陈静	1	39	4.96	72	164.5	59	92	62	12	21	6.52	69.50	388.00	4.74	0.97	17	1.18	3.10
漆延媛	1	38	4.81	95	155	59	155	97	13	20	6.33	59.00	265.60	5.44	1.86	25	1.60	3.33
许慢慢	1	30	5.42	89	158.5	58	119	82	17	19	4.00	39.50	226.30	6.00	1.57	15	1.21	4.16
杨惠惠	1	32	4.59	74	169	56.8	122	74	10	17	3.70	52.10	307.60	4.79	0.94	16	1.32	3.17
刘露露	1	34	4.81	77	171.5	54.6	131	79	16	18	4.10	46.40	189.30	4.61	1.00	12	1.14	2.92
杜萍	1	34	4.87	94	157	63.6	158	92	15	18	7.60	52.30	155.10	4.75	1.17	11	1.08	3.31
张红波	2	41	5.27	60	167	86.8	116	79	60	46	4.72	73.20	410.50	5.14	3.69	87	1.04	3.24
赵妍	1	31	5.53	82	156.5	58.6	125	70	7	18	6.10	61.90	325.30	3.50	0.85	14	1.22	2.10
桑倩倩	1	24	5.23	93	166	65.7	133	82	16	15	4.31	57.90	269.70	5.11	0.45	11	1.50	3.20
纪文文	1	30	4.69	84	157	52.6	108	63	21	20	3.10	41.30	267.30	4.86	0.68	34	1.86	2.88
李笑梅	1	33	4.85	102	155	53.3	112	78	7	13	6.70	47.50	255.50	4.13	0.91	13	1.09	2.42
王翠梅	1	30	4.54	87	154.5	44	113	70	9	22	5.19	50.20	216.80	5.64	0.81	12	1.62	3.69
樊桂茹	1	28	4.43	86	160	51.7	116	64	57	134	5.66	44.00	196.20	4.43	0.69	18	1.58	2.78
马路	1	32	4.08	90	167	82.2	129	77	21	19	4.14	54.80	361.40	4.75	1.67	29	1.20	3.04
路璐	1	37	5.21	90	160	56.3	118	71	38	36	3.90	51.10	215.00	4.81	0.57	34	1.66	2.86
钱会	1	37	5.23	97	170.5	78.2	126	85	10	19	3.40	50.90	247.30	4.69	1.13	15	1.40	3.01
李露露	1	25	4.66	73	168.5	53.6	104	62	15	22	4.80	45.80	241.50	5.05	0.75	12	1.49	3.28
魏萍	1	53	5.82	74	158	73.5	147	88	22	26	7.00	64.00	393.40	5.54	1.25	16	1.28	3.82
温小梅	1	38	5.35	82	167.5	66.8	123	79	15	18	4.32	40.10	229.70	3.80	2.12	19	1.09	2.47
张倩倩	1	36	5.00	68	155.5	73.2	126	65	12	20	5.60	48.70	237.00	4.22	2.09	27	1.12	2.70
董秀侠	1	41	4.47	74	162.5	66.8	129	78	20	23	4.90	45.90	314.70	4.97	1.12	17	1.27	3.29
聂丽	1	31	5.08	101	171	65.6	118	76	16	18	4.70	54.40	343.40	4.54	0.97	19	1.56	2.71
孙凯莉	1	26	5.02	83	162.5	48.9	116	65	22	27	5.56	52.40	290.60	4.82	0.58	20	1.55	3.37
唐佳佳	1	36	4.84	75	158.5	53	113	70	14	23	3.87	45.40	162.60	5.22	1.23	8	1.27	3.45
袁朝蕾	1	29	5.03	83	169.5	61.4	106	67	27	30	4.12	53.80	260.40	4.93	0.80	34	1.69	2.95
张永娟	1	38	5.37	113	147	51	140	81	15	22	3.50	56.80	252.00	5.05	1.38	18	1.68	2.80
王冉	1	33	5.64	92	168	78	136	88	20	21	5.00	47.80	277.30	4.70	0.71	17	1.52	2.76
陶冬梅	1	29	4.45	93	159.5	65.6	136	78	10	19	8.10	54.00	246.20	3.81	0.51	15	1.04	2.51
闫玉侠	1	40	6.05	86	161.5	63.4	126	79	20	22	6.10	53.70	309.20	4.19	0.50	16	1.58	2.51
张文会	1	35	4.97	75	152.5	53.1	124	68	17	22	5.10	41.80	282.80	6.08	2.28	31	1.19	3.71
黄艳艳	1	34	4.16	67	159.5	65	132	86	29	28	6.10	48.40	164.50	5.11	0.63	37	1.43	3.42
王盼	2	36	5.06	90	177	76.3	126	84	12	19	5.30	67.20	324.80	5.98	1.70	15	1.36	4.04
张艳艳	1	34	5.54	101	153.5	62.3	131	85	17	18	3.10	36.10	290.50	4.42	2.10	28	1.04	2.89
袁晴晴	1	33	5.32	118	172	71.1	137	80	16	19	3.84	63.50	179.50	4.62	0.69	16	1.71	2.72
王开勤	1	36	5.08	96	160.5	57	103	71	10	16	3.00	55.30	257.00	4.21	0.87	9	1.24	2.74
李秀勤	1	31	5.02	92	164.5	59.2	147	77	11	14	3.20	39.30	239.70	3.34	1.13	13	1.13	1.99
史明春	1	48	4.67	70	161	65.4	106	75	103	64	4.70	52.30	379.20	6.55	1.93	123	1.04	4.47
宋海燕	1	45	4.37	75	163	58	134	64	16	21	3.32	45.80	248.30	5.37	0.69	11	1.28	3.63
段冰冉	1	35	4.46	88	158.5	62.9	109	80	13	14	3.50	46.10	247.10	3.52	0.66	12	1.10	2.26
马梦思	1	36	4.30	75	164	58.1	105	59	13	21	5.00	61.40	376.00	4.20	0.54	11	1.66	2.37
孙欢	1	39	4.80	64	160	54.4	119	74	16	18	3.43	42.10	267.50	6.68	1.48	46	1.47	4.64
魏巧	1	33	4.63	77	171	65.3	105	63	19	35	3.20	48.00	289.40	4.47	1.18	30	1.44	2.93
朱永奎	2	32	5.17	85	164.5	64.5	136	66	46	32	4.10	65.20	376.60	4.56	1.35	37	1.06	3.07
孟光辉	2	34	4.24	63	177.5	85.9	119	70	26	21	7.04	73.20	322.10	4.99	2.66	28	1.17	3.32
彭瑞放	1	36	5.35	97	161	65.9	138	79	15	18	3.64	45.00	284.90	5.02	1.13	33	1.19	2.96
王琰	1	34	5.49	90	154	54.5	133	84	35	27	4.60	40.80	235.50	4.99	1.65	89	1.07	3.48
张猛	2	39	5.45	60	175.5	82	136	85	16	17	5.00	66.40	384.70	4.84	1.16	20	1.25	3.36
巩陈	2	42	4.10	58	169.5	66.1	121	64	13	20	6.20	72.00	258.40	4.50	0.43	21	1.41	2.61
朱微微	1	29	4.92	89	163	57.6	109	74	24	20	3.80	52.50	256.10	4.70	0.86	51	1.33	3.12
刘向阳	2	52	5.29	76	165.5	65.6	120	78	20	31	3.81	70.50	397.20	6.16	0.71	28	1.34	4.28
牛亚辉	2	31	5.34	91	185	96	130	69	31	24	5.73	74.50	354.90	5.89	1.05	70	1.85	3.72
杨路	1	35	3.89	86	162.5	53.2	112	73	17	26	3.90	51.10	212.70	6.11	2.48	17	1.39	3.75
杨娇娇	1	30	5.26	87	156	48.4	112	74	8	15	4.92	42.80	190.40	5.30	0.86	12	1.80	3.13
邹娜	1	38	4.18	73	159.5	55.8	113	71	50	32	4.40	60.70	229.00	5.24	2.33	93	1.16	3.65
张蕴頔	1	30	4.59	97	152.5	49.5	133	81	14	22	3.44	47.90	292.60	4.97	1.03	16	1.33	3.09
邹明	2	38	4.73	83	171	72.6	124	70	34	30	5.12	75.60	376.00	5.28	2.71	49	1.17	3.52
邓哲	2	37	5.04	90	182.5	69.8	108	71	17	22	4.60	82.70	440.00	4.44	0.77	18	1.35	2.78
呼国臣	2	37	18.83	104	173.5	77.2	154	102	38	27	5.96	63.90	382.30	5.66	6.32	55	1.07	3.20
胡伟	2	50	6.49	71	178.5	88.9	139	88	28	22	5.34	58.20	342.20	4.51	1.52	41	1.32	2.92
马晨溪	1	34	5.21	68	149.5	55.8	117	66	31	36	6.17	59.90	364.70	5.90	0.70	26	1.76	3.67
朱文婧	1	42	5.78	98	171	72	124	73	13	19	3.70	56.10	275.90	6.19	0.81	20	1.57	4.12
范雨露	1	29	5.21	80	166.5	65.6	113	63	8	20	4.25	50.50	283.80	4.73	0.92	10	1.27	3.10
李婷婷	1	34	4.48	78	164	71.7	124	89	19	22	3.90	43.10	382.60	3.64	2.21	20	0.86	2.38
徐曼曼	1	34	4.57	80	165.5	64.7	100	54	15	19	4.10	35.00	203.20	7.39	1.35	15	1.28	5.16
陈绚丽	1	29	4.67	77	162	54.4	115	64	13	19	4.06	39.70	203.60	3.93	0.77	10	1.35	2.34
张红岩	2	55	6.71	69	175	78.8	127	86	20	25	3.23	65.30	376.10	4.57	0.98	16	1.52	2.85
徐玉林	2	39	4.95	66	167.5	68.3	126	78	19	19	4.42	77.00	326.90	4.86	0.93	13	1.31	3.04
徐祥斌	2	37	5.24	71	167.5	69.4	122	79	17	23	5.76	66.90	496.60	4.94	1.42	110	1.03	3.46
张迪	1	33	5.01	77	164.5	60.7	102	52	20	21	5.20	47.00	211.20	5.17	0.74	19	1.73	2.97
仵永斐	1	37	4.90	89	165	64.8	109	66	14	20	4.30	44.40	320.80	5.07	0.78	14	1.27	3.34
王学锋	2	41	4.92	54	172.5	82.2	163	102	25	29	5.90	73.60	432.20	5.62	2.22	62	1.37	3.65
陈毛毛	2	35	5.10	99	180.5	71.3	140	83	27	28	5.24	73.10	439.70	4.82	2.45	41	1.08	3.23
孙雷鸣	2	32	5.16	95	182	97	156	93	38	24	5.30	64.10	462.70	5.92	5.06	42	0.86	3.99
李辉辉	2	31	5.74	100	171.5	83.7	136	87	61	30	6.70	68.10	514.10	7.18	2.99	58	1.26	4.90
佟小萍	1	32	5.05	71	163.5	61.6	103	63	36	29	2.81	47.20	275.00	4.51	0.60	16	1.43	2.87
李静雨	1	28	5.19	73	164	49.4	121	67	12	13	3.56	44.00	283.60	5.04	0.40	13	1.84	2.96
张小燕	1	34	4.98	85	163.5	58.8	145	93	22	22	3.55	46.10	218.30	6.38	1.37	21	1.71	4.02
王家蔚	2	32	3.97	79	182.5	99.4	129	91	51	35	6.10	82.40	541.40	4.24	1.05	56	1.34	2.64
高文洁	1	38	4.50	70	157	75.7	109	78	13	14	4.60	37.70	232.50	5.93	0.64	12	1.46	3.81
丰宇萍	1	28	4.79	98	159	48.2	108	72	8	14	3.36	39.50	323.20	5.14	0.59	14	1.75	3.14
孙云龙	2	29	5.42	105	165.5	65	121	87	20	21	6.55	65.40	318.80	6.28	1.02	24	1.57	4.13
田阳阳	2	31	5.01	71	172	78.9	119	74	69	38	5.30	66.20	385.40	5.69	1.38	43	1.01	3.81
葛结婷	1	50	5.50	67	162.5	67.2	154	95	15	18	6.70	65.20	398.40	5.71	9.38	66	0.88	3.01
李杨	1	31	4.71	79	169	65.8	126	78	11	18	6.75	59.80	233.90	4.92	0.94	11	1.34	3.21
邵静	1	33	4.97	80	166	57	122	71	18	23	5.48	58.90	250.00	3.81	0.47	12	1.68	2.17
孙坤杰	1	52	7.49	78	159	72.5	196	89	18	16	5.14	40.90	319.80	5.42	1.76	53	1.31	3.66
刘梅	1	45	6.04	71	158.5	65.9	142	84	20	21	4.00	46.90	322.80	3.07	0.76	24	0.93	1.96
岳云月	2	35	5.07	67	169	70.3	128	79	35	26	4.71	68.00	332.20	4.29	0.73	33	0.94	3.03
王志远	2	33	4.52	87	177	72.7	145	91	18	18	3.77	64.00	371.10	4.93	0.94	21	1.17	3.40
狄潘潘	2	34	5.55	94	173.5	83.3	121	76	69	40	4.60	83.20	349.90	4.67	2.58	28	1.02	3.11
李帅	2	32	5.26	84	175	99.4	148	92	17	19	5.70	74.00	419.80	5.24	1.87	24	1.06	3.76
常敬	1	45	4.78	77	158.5	64.7	140	93	8	27	3.10	64.00	286.80	4.99	0.75	14	1.60	3.05
李青	1	31	5.12	96	162	49.9	128	72	11	19	4.40	58.70	297.60	3.40	0.54	9	1.50	1.82
韩丽	1	51	4.81	77	157	61.2	117	75	18	22	4.02	48.00	200.00	4.97	0.72	13	1.63	3.18
华先进	2	40	5.69	62	166.5	68.4	119	72	24	26	5.90	83.90	385.40	5.11	1.75	40	1.10	3.14
李大雷	2	41	5.28	88	176.5	78.2	130	81	28	31	6.70	71.00	332.80	4.15	1.70	25	0.87	2.90
张守光	2	58	5.43	77	168	64.8	127	78	16	21	5.71	54.80	287.00	3.54	1.05	21	1.20	2.29
袁清侠	1	31	4.33	81	165.5	58.7	100	73	14	19	4.70	56.50	250.30	5.35	0.73	13	1.50	3.24
石頔	1	27	5.13	76	167.5	61.7	114	77	11	17	6.61	49.60	313.80	3.96	0.51	11	1.62	2.23
李振风	2	30	7.07	90	167.5	74.5	124	81	187	89	8.30	57.70	454.50	5.70	2.33	74	1.24	3.66
李素	1	30	4.99	86	157.5	60.5	119	81	29	24	3.80	46.90	292.30	3.93	1.63	20	1.06	2.49
张吉龙	2	28	4.64	86	170.5	77.7	132	76	25	14	4.70	58.90	430.10	5.31	2.06	43	0.99	3.20
王学闯	2	31	4.72	82	175	62	109	73	25	29	3.60	70.40	302.90	5.61	1.27	23	1.36	3.80
刘洋	2	25	3.81	79	172.5	71.3	132	84	22	18	3.64	75.30	347.90	3.77	0.45	12	1.36	2.29
王智慧	2	27	4.82	86	175	77.6	138	90	45	34	3.80	64.40	506.40	5.62	2.38	54	1.00	3.63
李征	2	27	4.88	81	176.5	83.1	109	70	19	22	4.60	75.40	379.20	5.02	1.44	21	1.18	3.09
何楠	1	27	3.66	65	154	49.3	112	74	8	18	5.80	60.40	351.30	5.13	0.79	11	1.37	3.50
何艳萍	1	27	5.06	77	166.5	46.5	115	76	11	20	3.00	46.90	303.40	4.45	0.53	14	1.83	2.23
李东晓	1	34	5.11	83	158.5	59.8	114	69	16	21	5.30	58.70	248.20	5.13	0.90	22	1.72	3.13
尹慢慢	1	34	4.87	81	164	53	114	72	27	31	4.10	60.00	270.00	4.79	0.90	29	1.64	2.95
李秀萍	1	35	5.36	71	165.5	66.3	107	54	11	20	4.50	58.60	240.70	4.52	0.73	15	1.33	2.81
姜培培	1	33	4.96	97	165	52.3	100	70	12	17	4.80	56.00	229.50	4.04	0.69	12	1.15	2.31
汪曼玉	1	32	4.70	76	156	60	95	72	15	20	4.40	50.00	464.70	6.55	1.48	20	1.56	4.38
张丽	1	31	5.16	80	158.5	62	119	72	16	21	4.70	44.10	324.30	4.05	1.05	15	0.97	2.78
李琛	1	29	4.53	70	163	63.7	106	68	119	82	5.11	49.10	186.20	4.62	0.52	15	1.93	2.55
柴梦园	1	25	4.50	80	156	52.3	111	70	30	32	4.08	54.50	234.40	4.01	0.59	11	1.71	2.09
张巧云	1	42	4.50	78	165	70	110	75	27	25	6.76	58.80	197.10	4.86	0.75	14	1.44	3.06
刘娟	1	39	4.69	73	161.5	66.3	105	65	14	18	2.80	42.50	228.20	4.01	0.86	17	1.41	2.33
李芮	1	34	6.67	90	156.5	43.8	118	75	11	15	5.60	48.80	281.60	5.18	0.79	12	1.48	3.42
化雨	2	34	4.88	104	176.5	74.4	129	73	31	27	4.42	63.80	405.90	5.81	3.50	37	1.10	3.83
姜鹏程	2	43	3.76	89	171	96.1	129	78	23	23	3.70	78.10	433.00	4.43	2.87	30	0.94	2.91
王新宇	2	28	5.25	65	174	70.1	151	87	17	20	4.10	68.90	479.00	4.48	0.66	17	1.34	2.67
侯亚申	2	31	3.96	78	181.5	84.1	131	73	20	23	4.20	65.20	324.90	4.32	1.02	21	1.01	2.92
张红	1	31	4.67	78	165	69.1	111	77	7	19	7.14	55.00	308.90	5.33	0.71	13	1.66	3.26
陈慧娟	1	34	5.22	84	弃检	弃检	134	80	17	25	4.56	49.40	338.30	5.55	0.94	16	1.71	3.55
刘丽	1	36	5.06	94	160	51.6	118	66	14	21	3.90	57.30	393.20	5.29	1.05	18	1.68	3.20
孟冰冰	1	31	4.75	91	164	61.4	108	69	16	19	4.70	58.50	284.10	3.80	0.78	17	1.18	2.36
赵欢欢	1	34	4.85	80	160	52	103	68	20	19	4.10	58.80	248.50	4.13	0.72	13	1.22	2.69
张鹏程	2	35	4.71	69	174	76.7	129	83	16	22	7.80	77.90	399.10	4.59	0.54	16	1.50	2.91
梁海	2	35	5.35	90	173	72.9	143	87	34	21	6.70	87.80	533.10	6.18	2.83	48	1.12	4.32
宋佳伟	2	35	5.02	73	176.5	70.7	142	78	13	21	4.00	95.10	428.90	4.88	1.08	17	1.19	3.59
康立明	2	28	5.66	84	179	83.9	137	86	35	24	4.90	64.10	451.80	5.76	2.69	105	1.77	3.49
张梦娜	1	28	5.71	80	160	70	123	77	14	15	4.00	52.40	309.60	6.08	3.15	14	1.04	3.98
季晶晶	1	29	4.91	71	159.5	62.7	107	56	33	29	4.39	54.60	318.50	5.84	1.21	59	1.74	3.59
李涛	2	28	5.30	103	174.5	63.9	140	79	12	18	5.40	74.00	432.90	6.43	1.88	17	1.22	4.62
宋格格	1	29	5.29	88	163.5	52.6	120	72	13	22	5.40	60.40	311.00	5.34	0.70	15	2.02	颈椎生理曲度变直；C3/4、C4/5、C5/6椎间盘轻度突出。
李双玉	1	26	4.03	61	158.5	48.5	112	67	10	18	3.84	44.80	323.30	4.62	0.83	12	1.53	2.90
谭佳欣	1	28	4.37	82	166.5	58	118	71	7	15	3.17	49.40	243.70	5.18	0.52	11	1.68	3.21
贺攀	1	34	4.76	77	164	69.6	96	69	10	16	5.40	52.50	286.00	4.22	0.76	11	1.11	2.75
司淑真	1	29	5.14	96	155.5	65.2	122	84	13	20	6.17	55.00	254.70	5.21	1.41	12	1.66	3.07
任倩倩	1	26	5.06	94	160	56.3	113	69	9	16	4.40	50.80	305.30	4.17	0.54	12	1.54	2.50
王文岩	1	34	4.23	78	162	52.2	104	68	12	18	5.50	47.70	277.40	4.14	0.77	11	1.31	2.67
李和娜	1	32	4.34	80	156.5	52.3	101	78	11	17	5.40	43.70	217.90	3.61	0.74	17	1.27	2.18
周静	1	36	4.70	78	165.5	55.6	100	70	13	18	4.90	50.20	246.90	6.54	0.68	20	1.80	4.29
潘红苗	1	25	4.19	81	159	53.1	96	69	33	29	3.50	49.10	237.40	4.07	0.83	10	1.73	1.96
张加洛	2	27	4.37	70	179	84.7	143	86	25	36	3.95	67.60	282.40	5.51	0.77	22	1.81	3.17
焦道明	2	32	4.73	90	177.5	93.3	108	82	37	28	5.00	92.10	376.60	5.48	3.82	52	1.26	3.47
张秋格	1	24	5.02	75	160	54.1	93	67	13	22	3.50	38.80	159.20	3.45	0.44	11	1.51	2.01
赵深深	2	26	5.58	79	171.5	64.5	134	78	16	22	7.40	69.50	263.30	4.48	0.99	39	1.15	3.02
张丽娜	1	23	4.80	74	162.5	54.8	133	82	6	14	3.40	46.90	216.30	3.84	1.08	11	1.24	2.36
李丽	1	25	4.32	75	167.5	57.4	130	77	13	16	4.00	54.30	277.30	3.52	0.91	12	1.31	2.11
张云龙	2	23	5.33	83	弃检	弃检	125	85	14	17	5.50	71.10	429.00	4.38	2.03	23	0.94	3.04
马东升	2	27	5.08	78	177	78.7	130	81	22	22	4.42	69.80	405.30	4.42	3.39	53	0.95	2.96
李福祥	1	26	3.97	66	170.5	62.1	108	64	10	19	6.73	56.70	339.00	5.82	1.36	14	1.75	3.51
蒋颜钰	1	26	5.09	96	171	50.4	110	76	13	22	5.60	48.30	234.10	4.32	0.75	12	1.57	2.72
刘媛媛	1	29	4.55	91	161.5	51.3	122	83	11	21	3.22	54.90	234.10	3.78	0.97	9	1.84	1.93
杨梦	1	30	4.86	115	160.5	50.9	110	69	21	24	3.60	58.90	515.20	4.76	0.87	16	1.35	3.28
尹惠惠	1	27	4.53	87	169	60.8	134	89	16	21	6.40	51.00	268.40	4.33	1.27	17	1.32	2.81
邢梦雅	1	23	4.83	68	159	58.8	112	67	22	19	3.30	55.10	282.00	2.26	0.24	22	1.18	1.23
林丽	1	33	5.24	90	162	59.6	107	69	13	19	4.60	48.70	260.00	4.67	0.63	19	1.22	3.09
王雪倩	1	34	5.21	95	163.5	58.9	107	63	9	16	6.00	44.20	214.70	5.11	0.77	12	1.76	3.10
卢腾飞	2	34	4.34	73	171	70	143	74	12	22	4.73	60.60	406.50	4.80	0.55	21	1.32	3.10
梁石成	2	38	5.32	82	185	90.2	116	63	23	31	6.60	60.00	577.10	5.14	1.30	30	1.61	3.09
张掂	1	33	5.12	72	153	57.7	108	66	10	16	3.20	43.30	291.70	4.29	0.77	13	0.91	2.96
俞莹	1	34	4.90	72	164.5	65.2	120	69	51	39	3.70	46.40	313.70	5.49	1.34	17	1.31	3.64
吕晶晶	1	34	5.07	73	160.5	53.7	109	71	12	18	3.80	42.80	229.60	4.91	0.69	8	1.58	3.12
石丽娜	1	36	4.92	104	153.5	50.6	136	78	12	19	3.58	49.40	273.30	5.44	0.55	13	1.11	3.78
汤艳	1	35	3.94	81	158.5	53.3	117	60	15	21	5.00	63.40	201.70	3.69	0.51	10	1.22	2.11
孙丹丹	1	35	5.18	76	168	58.8	117	64	8	14	3.98	51.60	271.50	3.65	0.70	9	1.32	2.13
王春梅	1	35	5.38	78	155	58.4	113	72	14	16	4.10	41.30	256.40	4.55	1.33	15	0.73	3.29
范秋云	1	33	5.23	99	165	60.7	113	69	15	20	4.75	48.40	288.10	5.90	1.17	20	1.54	4.15
张绍晗	1	27	5.06	80	163	55.9	107	73	10	17	2.99	52.50	228.10	3.08	0.78	13	0.94	1.99
王旭	2	47	5.06	82	165.5	67.3	117	74	16	18	4.60	77.50	302.70	4.18	1.10	19	1.14	2.81
孙峰	2	41	4.80	80	167	69.6	129	82	14	17	4.70	62.70	271.30	4.39	0.79	12	1.37	2.63
邵焕军	2	41	5.52	81	178	91.3	112	70	48	27	5.40	73.60	413.30	6.31	1.56	94	1.66	4.14
李岗	2	41	4.38	72	174.5	71.6	125	68	13	19	3.93	71.30	412.20	3.09	0.93	10	1.11	1.98
王成	2	50	4.78	88	172.5	60.7	123	86	22	24	4.30	62.60	298.60	4.87	1.24	29	1.22	3.17
李凯青	2	49	4.94	90	178.5	112.8	136	97	32	23	5.40	69.40	350.00	6.05	1.75	49	1.27	4.01
刘洋洋	2	38	5.19	75	170	71.7	132	81	12	16	5.00	63.40	386.70	4.47	1.11	17	0.93	3.26
陈玲	1	36	4.68	78	155	51.8	102	64	17	23	4.72	50.90	313.20	4.30	0.35	13	1.69	2.45
王璐	1	35	4.96	78	156.5	51.9	106	66	15	25	5.20	52.60	232.90	5.05	0.56	12	1.63	3.34
李妍	1	26	5.53	80	154.5	59.9	116	67	16	20	3.70	42.10	339.10	4.36	0.91	17	1.43	2.40
李俊瑶	1	39	5.17	76	165.5	56.1	120	50	11	19	3.60	51.10	256.50	3.55	1.23	13	1.13	2.30
王欢欢	1	31	4.89	89	156	48.7	110	70	14	21	2.92	51.10	177.30	5.02	1.03	12	1.63	3.15
支冬梅	1	42	4.63	72	154.5	50.2	144	86	20	20	5.04	46.60	322.30	5.03	1.90	16	1.24	3.36
陈程	1	33	5.07	81	165	57.2	111	83	18	24	4.40	59.60	399.20	5.08	0.66	17	1.55	2.99
樊静静	1	37	3.91	85	161.5	61.2	124	80	15	22	4.16	51.10	290.90	4.52	3.77	14	1.19	2.60
杨达	2	34	4.30	70	174.5	70	119	64	21	19	4.67	66.00	387.50	5.04	1.79	58	1.24	3.38
王斌	2	53	5.06	71	171.5	80.4	107	76	21	21	3.62	62.50	368.40	5.29	2.10	51	1.20	3.45
孙纪涛	2	44	5.74	88	168	82.4	159	102	32	24	5.70	60.80	303.20	7.35	1.11	42	1.43	4.91
杨锐锐	1	26	4.94	86	157.5	58.1	154	104	25	27	5.38	46.10	329.00	6.85	0.97	35	2.19	4.20
仵阳阳	1	36	6.76	102	157	69.4	163	88	17	22	5.80	49.00	348.20	5.41	1.53	12	1.61	3.17
吴志军	2	37	7.31	82	159.5	78.4	171	96	30	28	4.60	45.60	264.60	2.87	1.33	16	0.94	1.73
桑向阳	2	53	6.94	70	176	74.7	141	90	25	24	5.80	78.50	408.80	5.42	1.10	38	1.36	3.63
郭言言	1	32	7.99	78	156	63.6	140	84	20	26	5.11	50.40	282.10	6.34	8.84	25	0.94	3.04
董修明	2	41	4.02	69	169.5	76.5	155	95	16	19	9.20	89.10	519.60	4.86	1.41	18	1.67	2.89
姜晓慧	1	34	12.01	85	150.5	63	108	72	35	22	5.65	40.50	228.90	4.82	2.20	22	0.97	3.24
邱晓晖	2	58	5.84	60	169	76.7	116	83	27	30	5.20	74.40	353.30	6.23	1.10	39	1.49	4.16
王少奇	2	35	4.82	72	180	89.2	132	89	86	58	3.30	59.50	452.90	8.07	6.76	68	1.34	5.03
李言	2	54	5.46	91	171.5	74	138	93	21	24	4.20	71.10	268.00	4.32	1.03	13	0.93	2.60
徐锐	2	41	5.10	64	155	53	106	74	16	18	4.40	44.50	287.00	4.67	0.74	18	1.53	3.12
杨娟	1	33	5.01	90	157	57.5	113	71	13	17	3.09	43.20	291.80	4.13	1.48	16	1.27	2.52
孙宇倩	2	58	5.19	60	170.5	86.6	154	90	32	28	4.64	77.50	527.00	5.91	2.15	39	1.20	4.08
张颖	1	42	5.12	89	158	57.6	106	74	20	22	6.80	45.70	257.80	4.56	1.09	17	0.85	3.29
雷洁	1	32	5.49	83	157	61	121	86	11	15	5.50	51.60	366.80	5.21	1.93	24	1.15	3.52
王亚丽	1	33	5.05	97	158.5	57.2	111	74	15	20	5.60	53.90	237.60	4.79	1.21	15	1.40	2.62
梁曼曼	1	32	5.11	95	弃检	弃检	139	87	15	18	4.50	43.70	446.50	5.48	1.16	21	1.41	3.56
明秀秀	1	36	5.16	86	159.5	62.1	103	62	14	18	7.00	53.30	291.70	5.62	1.19	14	1.29	3.35
高音	1	35	5.17	70	158.5	57.5	119	70	10	18	6.70	53.00	238.50	5.27	0.58	13	1.79	3.16
乔羽佳	1	34	4.44	86	164	60.8	119	67	13	18	3.40	41.00	264.80	5.24	0.76	17	1.39	3.32
张翼腾	2	35	4.41	59	167	82	125	89	79	48	3.47	64.60	373.10	5.46	2.43	84	1.18	3.08
黄伟	2	35	4.38	85	170	69.2	132	88	15	16	4.79	62.50	283.50	5.66	1.59	19	1.12	3.99
于忠保	2	29	4.85	77	170	86.8	135	96	18	16	6.65	81.10	449.60	5.57	1.92	47	1.20	3.68
薛丽君	1	54	5.02	81	157	59.7	124	66	20	26	3.80	45.50	211.60	3.92	0.86	17	1.52	2.27
葛倩倩	1	32	4.56	94	160	63.8	100	63	14	14	3.78	54.30	199.70	3.18	0.84	10	1.00	2.13
李翠翠	1	34	4.65	81	164	64	126	81	20	21	5.20	48.40	240.30	5.32	1.01	15	1.41	3.33
雷伟	2	41	5.08	84	184.5	96.1	120	87	23	21	5.20	71.50	477.30	3.91	1.24	108	1.27	2.45
佟磊	2	42	6.37	81	180	89.9	140	92	38	32	5.90	69.90	297.40	8.35	4.42	192	1.62	4.89
崔玉记	2	41	5.57	68	170	72	130	85	46	30	4.60	63.20	295.90	4.40	0.91	117	0.95	3.06
黄明	2	45	6.82	74	179.5	89.1	146	97	31	27	3.92	69.70	382.50	3.80	2.49	104	1.62	2.02
崔高	2	49	6.78	72	177	80.5	119	72	16	18	4.31	79.20	393.70	3.92	2.91	22	0.93	2.47
梁启刚	2	44	4.81	89	171	75.1	146	98	34	20	10.00	61.00	459.80	5.40	6.67	136	1.23	3.30
蒋志军	2	46	5.10	83	170.5	81.3	131	92	84	64	4.50	64.80	435.30	3.58	2.97	40	0.95	2.15
马乾	2	45	4.04	77	174	87	110	80	20	24	5.83	87.90	414.60	4.45	2.30	28	0.90	2.90
刘新志	2	56	6.15	64	168.5	76.6	136	89	13	18	5.89	69.10	279.00	4.97	1.85	46	1.12	3.26
赵鹏飞	2	41	7.27	106	183	97.3	146	89	102	59	3.03	63.10	461.60	4.74	3.64	549	1.10	2.88
武赞赞	2	28	4.36	79	167.5	74.5	132	86	31	27	4.70	65.10	484.40	5.47	1.89	79	1.57	3.33
王申	2	41	8.99	98	174	75.3	140	96	20	18	6.76	50.00	258.80	3.86	2.97	34	1.07	2.42
明广州	2	39	5.16	92	175	81.7	129	81	29	24	5.30	76.10	332.30	4.66	0.70	68	1.24	3.05
田启成	2	37	6.41	72	174	83.5	129	88	29	23	4.10	68.30	595.00	4.15	3.51	36	1.00	2.66
李绍田	2	45	4.48	77	167.5	70.8	111	80	31	24	3.99	56.90	311.00	5.03	0.85	34	0.98	3.52
汪彩莲	1	54	5.05	65	152.5	57.1	128	84	12	18	4.70	50.50	265.70	6.60	2.92	17	1.24	4.73
鲍家友	2	34	4.83	75	165.5	76.1	116	80	24	25	3.90	64.10	464.00	5.04	3.06	25	0.89	3.29
童永强	2	49	5.41	68	165	61	133	85	49	41	2.70	62.70	381.60	4.46	1.18	126	1.98	2.17
王红江	2	38	5.34	69	174	63.8	111	74	15	20	5.70	68.30	288.20	3.32	0.87	12	1.14	1.94
赵凯博	2	28	4.74	78	177	72.5	113	71	13	18	4.70	66.90	330.90	4.39	0.81	15	1.22	2.69
王海坤	2	38	5.26	66	166	67.4	118	76	45	27	4.74	81.70	429.70	5.37	1.21	34	1.02	3.77
张清	2	34	5.31	80	179.5	72.8	115	70	13	17	5.30	63.60	400.20	3.64	1.14	25	1.21	2.07
师冕	1	34	5.37	81	164	62.9	112	75	10	18	4.60	56.10	211.80	4.33	0.90	14	1.41	2.59
胡振威	2	34	5.18	77	174	69.9	137	86	17	21	5.30	80.20	293.10	6.30	1.10	17	1.43	4.17
过之一	2	38	5.06	73	176	79.7	145	95	18	13	4.50	80.50	386.70	4.82	1.05	25	1.12	3.25
张一鸣	2	34	6.14	83	179	86.3	129	76	29	19	5.21	75.80	435.30	6.73	2.59	40	1.36	4.52
李田田	1	40	4.92	99	弃检	弃检	126	77	17	16	6.20	59.00	268.10	4.34	2.58	23	1.07	2.55
李婉婉	1	35	5.46	82	167	56.6	101	62	11	18	5.70	46.00	232.20	4.56	0.57	10	1.59	2.40
孔艳华	1	40	5.52	79	160	54.6	110	65	11	16	4.40	46.20	260.70	4.73	0.46	15	1.42	2.81
周玉森	2	59	6.53	62	168.5	88.7	153	90	28	41	3.70	72.60	378.40	5.56	0.79	44	1.91	3.58
石方方	1	38	4.84	80	153.5	48.2	90	62	11	19	5.30	55.60	247.40	5.26	0.73	11	1.67	3.05
唐菲菲	1	38	5.33	76	162	60.5	126	76	18	20	3.90	44.90	218.50	5.20	0.82	10	1.67	3.42
赵羽	1	33	4.59	75	163	63.2	97	64	14	23	5.10	55.00	213.90	5.33	1.00	10	1.44	3.47
王莹	1	39	5.16	91	162.5	61.5	105	73	21	16	5.50	53.90	256.80	5.00	0.69	38	1.43	3.08
邵勇	2	51	4.50	85	174	78.9	132	79	25	22	5.70	80.30	260.50	3.85	0.62	31	1.50	2.22
孟韧	2	59	5.14	74	161	65.7	143	89	24	24	4.20	62.70	408.50	5.50	0.88	25	0.96	3.66
庞茹	1	32	6.38	89	164.5	58.9	113	76	27	30	5.30	42.60	220.60	7.05	1.18	72	1.40	4.38
颜闪闪	1	31	4.89	89	172.5	55.4	112	78	12	17	4.70	37.80	231.90	4.59	0.46	10	1.43	2.95
蒋祥蕊	1	31	5.59	79	145.5	59.2	177	85	21	20	4.70	40.60	275.60	5.69	1.13	33	1.56	3.55
李晴	1	30	5.92	77	171.5	58.9	120	82	12	15	6.50	61.80	259.70	3.99	0.56	18	1.49	2.15
陈晓勇	2	42	6.90	66	180	78	125	73	57	44	4.10	59.90	391.20	6.04	1.20	66	1.09	4.25
余瑞雪	1	30	5.41	88	165	67	104	62	12	18	4.90	45.30	222.90	3.98	0.54	14	1.66	2.20
崔曼曼	1	35	5.31	74	157.5	96.3	124	72	13	26	3.80	49.70	388.90	4.98	2.08	27	1.31	3.05
陈大鹏	2	36	6.07	91	183	99.2	152	90	35	17	7.80	68.80	372.90	5.65	1.20	84	1.20	3.89
王晓东	2	53	4.87	69	174	88	149	96	27	28	6.40	79.80	472.50	5.89	1.60	35	0.94	4.38
邓林	2	38	4.92	76	170.5	77.7	146	77	16	24	5.50	84.30	415.40	4.42	0.92	31	1.05	3.09
刘源	1	38	4.72	87	156.5	53	117	62	14	25	3.51	52.50	291.50	6.77	1.17	13	1.92	4.50
佘婷婷	1	31	3.95	85	159.5	72	132	90	10	16	3.18	56.00	243.90	4.36	0.73	9	1.35	2.83
张誉丹	1	32	5.23	93	162	62.5	132	80	11	17	3.60	40.40	255.20	4.60	1.44	16	1.21	2.99
李靖	1	36	4.82	84	166.5	63.7	121	76	12	22	4.40	70.70	319.30	5.98	0.84	17	1.69	3.76
李雅倩	1	26	5.30	88	161.5	55.4	109	75	9	17	4.10	47.00	239.20	4.68	0.69	15	1.32	3.09
王芳	1	33	4.84	99	159.5	53.5	102	68	9	16	7.33	51.80	370.80	5.39	1.29	14	1.40	3.22
薛杰	1	29	5.03	70	165	50	111	60	15	20	3.90	44.70	186.50	4.53	0.53	44	1.33	3.02
张诣婧	1	28	5.65	82	166	54.1	118	70	16	21	3.30	49.50	212.20	4.59	0.76	14	2.04	2.36
杨蕊	1	28	4.53	85	162.5	57.7	124	72	21	18	3.30	54.00	333.60	4.15	0.56	11	1.43	2.57
李娟	1	42	4.19	80	158	50	120	80	18	28	3.00	37.80	228.70	5.94	1.18	14	1.41	3.45
宋晓红	1	45	5.20	79	159	64.7	122	73	11	18	3.63	49.80	258.20	3.39	1.82	13	0.88	2.20
崔春燕	1	49	8.37	85	153	75.1	158	89	21	20	4.90	47.80	234.40	4.87	1.48	21	1.81	2.59
闫建国	2	54	5.63	72	167.5	63	120	73	18	25	7.00	71.20	276.40	4.77	1.07	18	1.22	3.12
张凤玲	1	53	5.41	71	154	50.4	130	93	14	20	4.70	50.50	275.30	8.15	1.94	18	1.77	4.77
翟立伟	2	54	4.18	65	170	74.6	118	65	20	17	4.52	74.30	351.90	5.09	1.09	27	1.24	3.45
成凯	2	39	4.45	72	172	88.4	124	84	24	22	6.70	79.50	269.90	7.29	1.85	127	1.44	5.07
张磊	2	41	5.04	70	177.5	95.7	122	76	16	17	4.30	71.90	415.30	4.43	2.25	28	1.03	2.69
刘小飞	2	37	4.27	67	163.5	58.3	131	92	14	22	4.40	62.60	318.70	5.10	2.14	23	1.20	3.42
王大宏	2	58	5.40	74	171	76.7	151	93	30	24	5.60	61.90	430.40	6.60	5.28	30	1.13	4.24
周涛	2	55	6.01	71	171	65.6	138	79	17	16	4.10	66.10	345.30	2.73	0.81	49	1.07	1.44
付娟	1	45	4.77	87	172	64.1	111	66	11	18	4.70	50.30	215.20	6.76	0.38	19	1.63	4.05
刘晶晶	1	31	4.55	71	162.5	53.7	112	59	10	16	5.20	59.20	355.40	4.45	0.41	13	1.67	2.71
王海博	2	33	5.84	72	176	102	136	84	61	33	6.20	71.60	563.10	5.92	2.07	170	0.89	4.36
赵东东	2	35	4.93	91	168.5	64.6	120	75	33	26	4.40	75.50	448.90	5.61	1.24	25	1.27	3.75
叶明珠	1	34	4.69	74	159	52.7	104	70	51	39	4.30	50.30	271.00	5.98	1.58	75	1.39	4.09
李向阳	2	35	5.12	74	177.5	84.2	136	85	82	36	4.50	68.10	379.80	5.36	0.96	49	1.11	3.75
王玉玉	1	25	4.95	98	154	41.2	111	79	10	21	4.70	61.00	327.70	3.92	0.79	12	1.14	2.62
张清清	1	30	5.22	90	172	60	116	68	22	25	6.70	52.80	303.30	5.16	1.03	36	1.41	3.46
张芸芸	1	37	6.03	73	167.5	60.7	130	80	16	27	4.50	43.80	222.70	5.83	0.90	14	1.27	3.86
郭文慧	1	35	4.32	70	170.5	62	109	67	16	22	3.74	48.50	245.30	3.90	1.23	16	1.27	2.46
张利	1	30	4.32	74	159.5	49.9	113	67	14	21	5.00	57.30	254.10	4.78	1.04	17	1.59	2.82
刘晓慧	1	29	5.05	93	169	56.8	120	77	13	23	3.50	43.10	240.20	5.43	0.69	15	1.57	3.44
王蕾	1	29	4.75	88	170	61.5	127	84	12	15	3.70	48.30	274.80	5.65	1.06	12	1.54	3.72
刘磊	1	40	4.59	62	158.5	47.4	98	50	14	24	5.29	41.60	284.70	5.16	0.83	10	1.53	3.30
武晓芳	1	44	4.67	95	168	80	137	74	19	18	5.19	56.50	288.20	5.25	2.24	38	1.10	3.32
李秀芝	1	36	4.74	79	164	64.4	129	84	8	14	4.20	54.60	244.90	4.33	0.69	13	1.09	2.93
杨俊伟	1	34	6.71	99	166	66.7	166	80	40	24	2.60	31.80	337.50	2.88	0.71	18	0.74	1.81
田蕴	1	32	4.78	80	弃检	弃检	134	92	22	20	4.81	54.60	364.00	5.83	1.47	18	1.57	3.82
李玉花	1	38	5.42	76	163	55	105	65	12	18	4.22	44.30	162.80	3.54	0.59	11	1.33	1.87
张雪	1	33	4.82	99	161	51.6	111	65	10	17	3.60	51.40	259.80	4.91	0.92	13	1.95	2.74
刘若慧	1	35	4.78	84	163	64.7	134	90	15	19	5.00	49.60	183.20	5.18	0.73	13	1.29	3.54
张丽娟	1	31	5.26	70	158.5	53.4	109	72	20	21	3.30	47.00	255.00	3.60	1.04	29	1.10	2.20
刘晓雪	1	28	5.48	103	157	53.6	114	82	9	17	4.10	39.70	190.00	3.50	0.45	10	1.42	1.91
李贯清	2	44	5.02	87	165.5	68.2	128	97	34	31	5.59	77.20	385.70	5.59	1.38	49	1.45	3.80
靳怀永	2	49	5.22	70	173.5	85.3	124	85	50	29	5.89	87.10	419.90	5.06	1.80	84	1.24	3.28
李敏	1	43	5.11	78	166	51.4	116	78	9	18	3.29	45.80	197.30	5.13	0.94	12	2.10	2.98
张斌	2	36	5.77	80	179	81.3	111	65	46	骶尾椎周围软组织区少许水肿、渗出，腰部局部棘间韧带炎，请结合临床。	5.80	68.70	568.10	6.36	1.46	46	1.23	3.98
王翠萍	1	35	5.01	75	165	77	122	75	111	46	4.00	44.20	258.80	4.81	2.75	35	1.23	2.87
刘云	1	41	4.88	95	157.5	56.7	127	83	28	22	3.40	39.40	215.50	3.67	1.00	12	1.21	2.22
徐影	1	35	5.74	83	161.5	65.1	112	70	18	19	3.80	51.20	258.00	4.87	1.73	20	1.30	3.05
余书康	2	39	4.83	79	172	65	132	78	9	15	4.50	60.10	298.70	5.70	0.67	15	1.64	3.30
刘影	1	32	4.97	91	174	68.6	123	69	11	18	4.11	53.00	256.60	5.49	1.77	15	1.25	3.66
刘冰冰	1	32	5.06	81	165.5	69.3	112	84	22	21	3.60	47.50	305.90	6.08	2.02	17	1.27	3.67
丁圆圆	1	28	5.24	98	167.5	61.4	113	70	8	14	3.82	53.50	202.50	3.84	0.98	11	1.45	2.28
苏平	1	29	4.88	80	158	50	127	74	9	13	4.52	57.60	252.20	3.97	0.41	11	1.66	1.89
田园	1	36	6.43	106	161	73	129	76	121	74	4.30	46.70	379.90	5.47	1.87	164	1.07	3.73
祝丽	1	37	4.50	83	152.5	60.7	121	72	12	20	5.00	53.80	346.00	4.69	1.01	12	1.40	2.92
刘敏	1	24	4.02	92	165	63.2	123	80	10	16	4.62	55.90	331.50	4.46	1.16	15	1.09	2.92
孙玉	1	32	4.82	80	160	57.7	102	69	28	26	5.67	55.50	297.50	5.34	0.77	13	1.66	3.41
李小莉	1	28	4.65	93	154.5	47.3	100	65	9	18	5.20	43.80	273.60	4.80	0.67	9	1.60	3.20
张凌飞	1	29	4.45	108	169	55.8	123	83	11	20	4.89	54.70	272.50	4.67	0.87	18	1.62	2.96
王家文	2	59	5.84	87	161.5	59.4	123	83	32	26	6.00	65.10	324.30	2.63	0.59	15	1.08	1.49
邓如明	2	42	5.59	90	弃检	弃检	138	84	81	36	6.40	58.40	335.50	6.03	1.75	43	1.21	3.85
孙政	2	60	4.82	69	167.5	92.5	166	97	30	25	4.97	75.10	503.90	5.08	3.15	87	1.00	3.30
王学思	2	51	4.97	68	171	76.9	123	78	22	24	6.92	80.80	408.70	6.41	0.69	57	1.77	3.88
刘园园	1	36	4.71	100	160.5	56.6	108	72	15	22	3.80	42.90	220.80	4.71	0.69	15	1.23	3.31
邢婷婷	1	38	5.27	86	156	58	125	73	21	20	3.30	41.20	246.80	4.68	1.98	22	1.01	3.21
梁瑞	1	36	4.74	117	159.5	45.5	124	89	20	24	4.60	45.60	241.90	5.24	0.48	52	2.34	2.79
王灿	1	33	4.80	101	163.5	62.1	118	75	11	20	3.50	41.00	239.30	4.85	1.03	21	1.46	3.05
赵中原	2	32	4.91	82	177.5	65.1	134	76	16	17	5.10	63.70	265.40	4.58	1.39	22	1.21	3.10
王丽娜	1	44	4.07	98	162.5	62.3	104	68	18	20	6.10	49.70	227.40	5.72	1.32	19	1.65	3.65
王莉莉	1	44	5.21	77	155.5	53.5	107	72	13	18	4.38	53.50	314.60	4.54	0.88	12	1.37	2.97
王蕊	1	31	5.35	71	158.5	66	140	69	15	19	5.20	52.20	435.30	6.30	2.37	30	1.52	4.55
刘晶晶	1	40	5.08	93	156.5	52.4	126	67	18	19	4.40	59.90	194.70	5.59	1.01	10	1.30	3.68
谭文举	2	40	5.49	82	164.5	70.3	208	126	24	25	4.13	69.50	385.20	5.56	2.25	41	1.08	3.99
侯保山	2	58	5.49	84	177.5	84.5	152	92	143	33	2.87	65.30	378.30	5.42	1.29	200	1.08	3.83
杨桂芹	1	55	5.56	66	157	70.3	121	71	35	27	4.90	59.60	422.20	3.23	1.75	15	0.94	1.91
黄蓉	1	30	4.66	74	167.5	62	100	69	11	22	5.30	64.30	224.70	6.22	0.53	14	1.90	4.02
章超	2	32	5.53	91	165	80	154	92	130	61	4.43	77.20	471.90	8.46	1.81	98	1.75	6.23
张佳会	1	26	5.50	82	166	63.3	119	65	12	18	5.20	47.50	305.50	4.71	0.49	10	1.57	3.14
钱焕丽	1	40	4.97	88	169	78	117	76	11	15	4.80	49.80	244.70	4.41	0.76	15	1.35	2.87
郎璇	1	36	4.71	91	164.5	55.5	108	75	11	19	4.20	65.40	213.10	5.08	0.46	29	1.97	2.77
周倩倩	1	24	4.52	86	167	61.5	102	56	7	14	3.44	48.60	289.10	4.09	0.56	4	1.13	2.76
尹志朋	2	39	4.60	70	168.5	74.9	118	79	30	腰5/骶1椎间盘膨出伴突出（右外侧型）；腰骶部皮下肌筋膜炎。	7.10	74.10	439.90	5.08	1.76	37	1.26	3.46
管晓静	1	32	4.81	104	168.5	58	125	81	9	16	4.50	46.50	234.60	3.69	0.91	17	0.93	2.31
景茜娜	1	31	5.13	111	164.5	64.6	127	87	23	21	8.50	58.50	243.80	5.83	0.65	18	1.43	3.83
程双双	1	28	4.31	66	167.5	58.1	111	73	10	19	5.64	51.40	314.90	4.42	1.08	11	1.43	2.73
马伟伟	1	31	4.40	79	156.5	61.6	112	77	16	20	3.60	56.90	333.40	5.21	0.92	22	1.15	3.20
郭双双	1	27	4.06	84	162.5	55.8	132	88	27	33	3.82	47.00	373.40	3.51	1.88	20	0.94	2.16
李佳	1	23	4.32	99	165	59.4	117	68	10	14	3.05	50.20	259.10	6.52	1.00	25	2.07	4.06
于浩	2	38	5.16	102	163	72.9	122	71	34	30	5.20	62.60	461.70	4.46	1.89	46	0.83	3.11
李昌权	2	39	5.44	64	164.5	74.9	132	91	34	30	5.84	81.80	297.40	4.35	1.31	27	0.93	2.98
许建国	2	42	5.40	93	172	70	125	73	44	22	5.75	72.30	371.20	7.00	2.20	48	1.55	4.31
黄宝玉	2	40	5.62	75	169	80.2	139	82	45	27	3.60	63.20	415.60	5.58	1.73	50	1.16	3.64
赵静静	1	35	5.21	75	163	67.5	108	72	32	23	4.70	50.70	219.40	6.16	1.37	15	1.26	3.55
周培培	1	36	4.40	78	161.5	59.7	107	59	13	21	5.05	40.20	175.10	3.74	0.58	14	1.40	1.85
黄书芹	1	39	7.31	78	165	57	123	68	8	20	5.00	59.60	701.90	5.11	1.02	21	1.24	3.23
唐浩	2	35	5.61	70	181	81.8	136	77	22	26	6.00	79.70	442.20	5.53	1.90	51	1.21	3.76
汪四秋	2	59	4.86	82	163	86.7	158	91	21	26	7.90	68.40	440.30	5.96	1.04	21	1.16	4.21
张敏婕	1	50	5.09	73	154.5	48	137	86	30	29	4.04	48.30	294.80	7.07	0.65	14	2.47	4.23
徐艳萌	1	30	4.48	84	159	47.2	103	64	20	31	4.13	45.30	225.70	4.07	0.56	11	1.69	2.25
李莉	1	53	4.81	77	157	59	131	83	17	25	4.80	58.90	195.70	5.79	0.91	18	1.62	3.66
刘春燕	1	30	4.76	81	162	66	115	70	18	22	3.80	60.20	314.00	4.62	0.99	15	1.30	2.97
冯雪艳	1	29	4.65	82	弃检	弃检	115	70	14	21	2.40	44.60	260.30	5.29	0.56	11	1.45	3.36
张洪领	2	38	5.95	87	172	91	130	89	55	37	5.60	79.80	340.60	3.29	1.76	37	0.79	2.24
赵太云	1	59	4.91	76	157.5	59.3	139	81	20	26	7.49	54.80	284.90	4.29	1.26	18	1.60	2.50
涂静	1	45	4.67	81	168.5	61.6	115	72	8	15	3.92	48.50	203.60	4.94	1.79	8	1.40	3.07
刘瑞	1	29	5.40	72	164	55.9	113	60	11	15	3.10	40.10	190.70	4.59	0.44	17	1.60	2.81
王秀勤	1	39	4.99	100	160.5	52.8	134	69	11	19	4.20	52.00	244.40	3.31	0.56	18	0.87	2.16
李婷	1	31	4.94	83	170	60.3	108	73	14	20	3.80	44.60	294.20	4.34	0.74	11	1.21	2.99
杨洁	1	37	4.97	83	155	64.7	163	114	22	20	3.80	39.80	253.30	5.00	2.37	21	0.91	3.36
朱蓓蓓	1	46	4.38	83	152.5	56.4	116	75	24	28	2.69	63.00	350.00	5.27	0.99	33	1.35	3.56
梁飞飞	2	36	4.77	81	174	75.4	138	84	12	17	5.00	76.30	311.60	4.18	2.06	17	1.23	2.72
陈亚奇	1	47	5.84	73	157.5	68.3	135	72	26	23	5.17	56.30	293.90	4.94	0.95	39	1.47	3.38
庞婉婉	1	34	4.10	85	162	52.7	120	67	13	21	3.48	58.40	210.70	5.01	0.66	13	1.97	2.98
温娟	1	33	4.22	89	165	60.6	116	70	18	21	5.41	53.20	336.10	4.84	0.78	15	1.43	3.00
邓智慧	1	30	4.05	79	160.5	50.4	103	60	11	14	1.90	32.50	217.20	5.33	1.30	13	1.94	3.33
孟倍倍	1	30	5.36	79	169	46	89	62	9	16	6.10	58.00	196.70	4.93	0.84	11	1.58	3.03
锁傲雪	1	29	4.31	68	159	47.7	120	78	10	17	3.96	46.40	274.00	4.83	0.77	14	1.73	2.81
刘芮	1	30	5.42	89	163.5	61.7	104	63	11	17	4.30	62.40	263.30	4.17	0.57	16	1.39	2.57
司千千	1	28	5.44	94	161	48	104	66	9	17	3.20	49.80	318.30	4.98	1.03	13	1.75	2.86
杨冰	1	28	5.13	92	162	55.5	110	70	11	15	3.98	53.30	230.40	4.21	0.52	11	1.54	2.58
郝庆丽	1	31	5.43	107	160	78.9	127	80	54	28	3.48	45.40	346.80	4.52	1.81	30	0.93	3.15
张晓宁	1	31	4.83	121	166	56.9	119	90	15	23	3.60	53.10	203.10	4.32	0.62	10	1.41	2.73
张新悦	1	29	5.32	76	163	54	107	66	12	17	4.60	46.00	309.40	5.03	1.03	14	1.99	2.97
主姣姣	1	30	4.89	67	154.5	55.3	110	70	6	15	2.35	44.50	199.30	2.89	0.62	10	1.35	1.51
牛倩倩	1	29	5.03	79	169.5	53.1	110	63	13	21	4.40	42.80	208.90	4.45	0.51	13	1.52	2.68
孙静	1	29	4.92	92	163.5	68.9	116	75	13	19	4.67	51.60	300.00	3.70	0.86	11	1.19	2.31
王兰	1	44	4.04	82	158	56.8	109	63	14	22	3.24	48.40	292.70	5.26	1.21	18	1.43	3.28
李娟	1	35	4.54	71	163.5	61.9	106	65	15	19	4.17	43.40	295.90	4.93	1.25	23	1.73	2.90
桑玉	1	33	5.83	84	156.5	60.5	125	81	39	35	3.43	49.40	276.20	4.67	1.02	23	1.35	2.90
刘迎迎	1	39	4.60	81	164	59.7	121	83	9	14	5.33	54.70	251.70	5.23	0.87	15	1.32	3.54
刘国磊	1	36	4.96	92	160.5	53.5	134	84	15	21	5.55	53.40	191.60	5.44	0.47	18	2.29	3.00
金琼	1	35	4.81	88	167	64.2	118	79	12	18	4.93	42.70	239.50	5.14	1.49	17	1.93	3.04
王韦伟	1	33	4.76	81	153.5	58.1	110	61	18	18	3.10	36.50	244.20	2.80	0.44	18	1.08	1.78
祝叶红	1	32	4.34	70	159	55.3	111	65	13	13	4.20	35.00	219.40	4.58	0.74	11	1.15	3.10
薛给给	1	30	5.71	87	161	69.1	126	73	22	23	2.80	44.80	210.80	5.85	1.02	19	1.40	3.82
李倩茹	1	30	5.48	77	156.5	49.5	121	79	16	29	4.50	59.30	359.20	5.23	0.49	14	2.06	3.10
蒋丽	1	46	4.74	69	163	62	138	87	16	22	2.90	50.10	301.30	5.48	0.62	15	1.69	3.53
尹腾飞	2	38	5.29	87	180	83	143	95	24	21	5.90	94.70	403.10	6.96	1.92	44	1.53	4.65
李从军	2	40	5.88	81	167	74.7	127	85	60	37	7.90	81.90	377.50	5.62	1.23	61	1.31	3.86
王雪雷	2	38	7.38	96	168.5	76.2	121	81	54	29	5.50	67.60	455.60	3.94	1.27	25	0.95	2.40
代景友	2	39	6.07	88	163	70	148	101	18	17	5.40	73.70	346.90	5.02	2.56	34	1.22	3.12
曹耀戈	1	37	5.18	71	165	59.9	115	75	7	13	5.90	47.70	276.90	4.29	1.20	15	1.25	2.45
李靖	1	32	3.93	85	160	51.8	111	73	8	18	5.63	48.20	294.30	5.53	0.73	8	1.33	3.93
鲁强	2	33	5.06	78	163	72	126	83	41	25	6.30	52.80	391.60	5.57	1.89	37	1.25	3.59
梁伟丽	1	46	5.22	75	149	58.7	102	67	13	18	2.70	43.10	197.80	5.14	0.65	19	1.40	3.10
怀腾腾	1	33	4.97	83	158	55.7	113	72	9	17	4.50	51.30	251.10	3.58	0.90	11	1.17	2.19
曹雪悦	1	34	4.97	90	159.5	61.7	114	78	10	16	4.93	58.50	330.60	4.91	1.01	12	1.31	3.05
岳祥芳	1	40	5.52	73	164	66.5	130	73	11	17	4.14	46.50	240.20	4.12	0.67	10	1.97	2.11
王子洁	1	36	4.38	93	156.5	49.3	105	68	20	24	5.93	51.60	287.50	4.45	1.89	13	1.25	2.79
李情情	1	34	4.86	72	161.5	58.5	109	66	20	24	3.50	46.60	245.60	4.99	1.09	15	1.12	3.13
杜秋梅	1	35	5.16	80	156.5	60.8	124	66	8	18	5.09	56.20	230.10	6.59	1.13	16	1.35	4.60
孟珂	1	31	4.85	65	167	54.9	115	48	17	22	3.33	48.60	250.30	4.98	0.46	11	1.96	3.08
李远远	1	32	3.99	74	169.5	61.6	104	70	20	24	3.76	46.10	191.00	3.43	0.32	11	1.36	2.06
周芳	1	47	6.19	79	150	56	167	99	163	101	3.30	44.90	361.90	7.47	2.77	78	1.54	5.01
李亚莉	1	41	4.42	91	154.5	49	106	59	11	19	3.50	60.50	279.60	5.01	0.85	10	1.61	3.21
随素敏	1	52	6.61	70	159	65.1	131	83	30	25	4.40	41.20	228.00	6.85	1.30	30	1.32	4.88
张素梅	1	47	4.78	89	155.5	50.6	93	54	13	18	5.70	46.80	262.90	5.76	1.32	20	1.32	3.70
詹影	1	38	3.94	83	162	53.3	117	72	10	17	4.37	54.00	221.50	4.47	1.34	13	1.46	2.69
张鑫慧	1	36	5.10	79	169	62.4	100	69	6	18	3.30	54.50	219.10	4.49	0.44	12	1.64	2.54
李敏	1	35	4.95	73	163.5	56.8	115	68	8	15	3.20	46.10	326.80	5.36	1.26	16	1.44	3.22
肖飞	1	36	5.24	83	169.5	65.6	113	61	11	16	6.80	45.40	322.80	3.99	0.66	12	1.19	2.29
吕玉萍	1	37	5.37	82	157.5	55.6	126	84	21	25	3.50	47.10	255.20	3.64	0.61	20	1.18	2.37
曹云	1	45	4.89	83	172	65	129	75	15	24	2.40	65.60	354.80	4.11	1.51	14	1.01	2.61
李威振	2	33	5.14	94	170	83.7	137	92	63	31	4.71	69.90	461.70	5.08	1.67	78	1.06	3.62
王浩	2	29	4.68	86	173	75	122	76	58	33	7.20	67.40	375.10	5.01	1.56	60	0.99	3.35
丁丽亚	1	30	4.46	79	160.5	56.8	108	63	22	23	3.18	58.10	311.60	5.52	1.15	28	1.72	3.41
李伟	2	40	5.25	87	171.5	77.1	138	89	47	32	6.72	85.90	385.00	6.73	1.63	84	1.26	4.84
王伟	2	38	5.81	93	174.5	100.1	146	93	94	62	6.60	66.60	422.80	4.94	2.54	136	1.01	3.08
杨金梅	1	39	5.94	88	160	62.9	132	90	11	18	3.60	43.50	251.70	4.85	0.92	14	1.43	3.10
孙涛	2	37	16.67	101	172.5	93.5	162	110	47	29	6.00	62.90	365.60	5.57	5.63	61	0.85	3.24
袁培培	1	39	5.38	88	166	70.3	125	78	13	20	3.60	46.40	204.10	5.47	1.67	17	1.30	3.60
罗静	1	36	5.33	70	172.5	71.8	104	65	26	23	4.00	58.20	297.10	3.70	0.46	13	1.22	2.33
王晓琪	1	32	4.73	101	152.5	45.8	120	73	7	16	4.60	57.40	304.40	6.18	1.33	11	1.83	3.89
夏文文	1	31	4.86	88	160	60.3	109	73	13	22	3.56	47.50	220.40	3.93	0.57	12	1.12	2.66
王博文	1	28	4.82	95	170	62.1	125	72	9	19	5.72	55.00	263.70	4.73	0.56	8	1.93	2.73
李雅晴	1	26	4.27	88	165.5	50.8	104	57	13	18	2.90	46.10	192.30	4.47	0.59	9	1.62	2.82
张侠	1	45	4.06	89	161.5	52.4	127	84	16	26	3.30	68.50	208.40	4.90	0.72	15	1.76	2.90
韩燕如	1	39	5.29	78	163	61.2	111	62	14	13	5.20	45.80	225.00	4.83	1.67	21	0.94	3.27
谢卿	1	33	4.72	99	172	63.7	140	91	19	25	3.60	52.90	229.90	4.52	1.26	20	1.36	2.38
李东戈	2	35	5.94	90	176.5	81.9	138	91	37	23	5.42	87.20	423.30	6.33	0.73	30	1.54	4.19
翟文博	1	26	5.73	102	167.5	59	117	81	16	19	5.10	57.90	388.10	4.54	0.97	23	1.45	2.40
宋凯丽	1	32	5.07	86	157	52.2	114	70	15	21	5.20	52.10	297.10	5.34	1.26	15	1.34	3.62
赵洪瑞	1	24	4.72	69	172	61	124	70	13	18	5.41	38.10	206.00	4.52	0.61	13	1.53	2.79
郭富强	2	29	4.70	65	182	88.2	122	69	20	15	4.03	66.70	327.20	3.97	1.65	29	1.06	2.53
李志强	2	26	4.07	67	189.5	63.8	119	70	13	26	4.60	71.20	285.70	3.83	0.54	19	1.68	1.89
陈多学	2	50	4.87	90	191.5	95.5	118	69	13	16	7.30	90.00	566.20	7.17	1.31	27	1.08	4.84
杨光耀	2	39	4.81	79	167.5	77.4	128	73	41	32	5.70	65.50	537.80	3.42	3.36	135	0.85	2.15
赵攀	1	37	4.66	87	157.5	63.8	99	56	10	16	4.75	41.80	343.00	4.64	1.01	12	1.29	3.16
连春雁	1	38	4.82	77	164.5	50.6	98	68	11	18	2.88	47.00	255.60	4.86	0.65	16	1.89	2.80
潘虹	1	34	5.18	69	155.5	60.3	145	92	12	17	4.10	50.80	315.50	6.06	1.88	32	1.22	3.68
孔珺珺	1	37	7.03	80	159	51.7	111	65	8	15	6.20	62.30	236.50	5.80	1.26	15	1.02	4.21
马辉	1	38	4.37	70	162	53.3	110	60	11	19	5.86	48.30	299.00	4.73	0.89	10	1.31	2.97
潘路华	2	34	5.57	85	182	85.2	122	76	35	28	4.10	73.00	384.40	4.15	1.26	33	1.06	2.67
张文兴	2	38	5.94	68	183.5	85	133	85	36	23	4.36	75.90	306.70	5.58	2.78	37	1.27	3.66
魏焕焕	1	32	4.18	94	161.5	54.9	115	81	16	19	3.36	47.30	247.40	5.22	1.34	30	1.35	3.31
张曼	1	31	4.91	88	158	53.8	118	78	12	23	6.00	50.10	176.90	5.60	0.97	12	1.68	3.49
王婉莹	1	28	3.85	78	154.5	63.6	103	65	14	18	5.70	41.50	303.20	6.06	3.27	16	1.39	3.56
陶雨珠	1	25	4.95	105	168.5	58.8	105	61	24	22	4.40	48.90	336.40	5.20	1.12	18	1.36	3.30
许海侠	1	40	5.20	83	172	72.2	113	62	45	28	3.10	48.90	296.90	5.28	1.92	19	1.31	2.87
董松武	2	42	5.60	78	164	68	117	76	15	20	5.28	90.00	290.20	5.33	1.29	15	1.34	3.17
吴桥	2	59	5.21	67	168	75.1	142	88	19	腰椎退行性变；腰3椎体下缘许莫氏结节形成；腰2/3、腰3/4椎间盘膨出，腰4/5椎间盘膨出并突出；腰骶背部软组织渗出水肿改变。	6.92	79.00	488.10	3.95	0.89	28	1.26	2.34
孙振峰	2	37	5.06	75	172.5	81.4	169	102	22	24	4.10	63.70	284.10	4.01	1.76	19	1.44	2.18
武琼	1	34	4.36	81	158	55	121	80	10	16	3.60	41.50	278.60	4.16	0.75	11	1.26	2.57
丁倩倩	1	35	4.52	90	168.5	56.5	124	73	16	19	2.60	39.20	169.30	3.83	0.36	18	1.44	2.35
薛倩	1	38	4.49	88	159	49.6	108	65	9	13	4.06	36.20	296.90	4.19	0.54	13	1.44	2.63
刘艳梅	1	39	5.08	71	弃检	弃检	121	58	11	18	2.70	51.00	285.10	3.84	1.55	12	0.98	2.44
邓楠楠	1	37	5.16	85	弃检	弃检	133	80	26	25	4.10	47.60	293.00	5.92	1.63	17	1.14	3.97
怀敬敬	1	35	4.87	84	160	58.3	112	65	16	19	4.30	45.00	277.40	4.61	0.58	21	1.71	2.95
王炜灵	1	33	5.46	78	154	88.6	110	70	23	22	4.80	43.60	381.70	5.93	1.18	23	1.39	3.53
于会梅	1	29	3.81	75	160	53.3	127	72	12	19	3.90	53.60	332.40	3.26	0.65	11	1.10	2.14
骆红亮	2	39	3.87	65	167.5	66.5	124	76	18	23	4.20	67.40	375.60	5.44	1.32	25	1.40	3.62
涂黎明	2	34	5.75	86	171.5	91	139	76	42	24	3.35	68.10	407.10	7.05	6.48	87	1.06	4.48
王圆梦	1	27	3.69	86	163	52	105	61	10	19	4.40	50.70	245.30	3.92	0.46	13	1.45	2.00
梁宵	2	30	11.57	107	174	82.8	141	93	36	25	3.84	55.10	388.30	5.40	5.51	28	1.07	3.28
董园	1	31	4.87	68	170.5	84.3	130	85	12	24	3.64	51.60	190.70	4.50	1.47	19	1.24	2.96
张菁	1	31	4.54	109	165	60.4	125	76	16	22	3.95	44.00	176.20	5.45	1.07	17	2.04	3.14
王荣梦	1	31	4.80	81	161	60	130	73	12	14	6.30	46.50	355.80	5.21	1.09	24	1.74	3.21
李文文	1	31	5.17	89	163.5	57.7	102	71	9	16	3.60	44.70	193.60	3.66	0.68	11	1.24	2.23
冯景	1	39	5.00	73	弃检	弃检	123	68	19	23	3.60	54.80	296.00	5.60	1.06	14	1.55	3.59
许廷兰	1	41	16.64	111	158	74	179	101	22	20	3.90	33.00	190.10	6.05	1.69	32	1.30	3.96
樊冠颖	1	35	5.53	82	166.5	67.8	116	70	21	21	3.60	55.30	292.10	6.55	1.06	13	1.62	3.25
徐惠琳	1	32	4.90	82	162	65	117	68	16	19	4.00	54.10	272.30	5.61	0.52	16	1.76	3.77
任永凤	2	45	5.28	80	177.5	88.8	132	92	22	18	4.71	70.20	379.70	4.98	3.13	62	1.13	3.08
马召	2	34	9.07	97	165	74.2	133	97	39	25	7.54	73.50	375.40	4.34	1.84	62	1.09	2.68
黎栋	2	34	6.40	73	178.5	95.9	121	77	95	47	4.90	86.40	401.70	5.56	1.99	22	1.00	3.16
杨红	1	44	5.69	77	145.5	56.6	127	74	8	17	4.70	48.80	275.70	4.90	0.97	13	1.34	3.20
陆静	1	37	5.03	87	162	62.5	116	62	12	21	3.40	50.10	279.90	4.69	0.66	15	1.40	2.83
张瑞	1	36	4.62	103	162	57	154	92	10	13	4.10	50.70	298.20	5.11	0.74	14	1.76	3.19
蒋爱清	1	48	4.77	94	160.5	53.7	118	64	16	22	5.50	52.90	367.50	5.23	1.32	13	1.40	3.11
李珂	2	39	4.80	66	180	83	141	96	27	23	4.40	63.10	415.30	5.23	2.55	57	1.13	3.13
邓士敏	1	32	3.96	76	153.5	53.1	135	90	12	19	5.06	58.20	380.10	3.89	0.46	11	1.42	2.32
李浩宇	1	31	4.84	74	165.5	55.5	109	70	13	20	5.48	52.20	256.30	3.40	0.77	11	1.15	2.09
段林	1	35	4.82	93	161	53.9	118	83	11	16	4.01	47.70	271.90	4.78	0.84	11	1.34	3.21
卢艳云	1	32	5.17	84	162	61.2	117	63	10	14	4.10	42.30	225.90	3.61	0.58	14	1.02	2.20
邹伟伟	1	34	5.21	85	弃检	弃检	112	75	9	14	4.70	47.20	296.90	4.14	0.79	13	1.00	2.91
王倩倩	1	34	5.19	79	166.5	59.2	123	72	10	15	2.70	53.50	264.00	4.92	0.55	11	1.36	3.22
宋长城	2	33	5.37	89	164	75.1	118	82	94	35	5.10	57.30	405.20	6.19	2.08	94	1.10	4.40
修利平	1	36	4.71	72	165.5	60.5	142	76	19	26	5.10	36.90	257.00	4.02	0.75	24	1.65	2.14
郑秋晨	1	36	5.16	88	弃检	弃检	100	62	21	24	8.00	47.10	213.60	6.09	0.67	50	1.66	3.64
尹慧	1	41	5.73	81	169	72.5	129	81	23	26	4.21	64.80	252.50	5.95	1.74	18	1.31	3.97
王智慧	1	38	4.93	110	165.5	78.7	136	69	16	18	3.20	51.80	232.90	3.78	1.24	21	1.05	2.37
张璐	1	38	4.80	86	弃检	弃检	104	61	17	18	4.37	56.90	331.10	4.72	1.26	13	1.30	3.04
刘妍	1	33	4.96	96	160	59	122	73	11	16	4.70	67.10	274.80	5.21	0.68	13	1.39	3.51
杨春雨	1	35	4.96	95	162.5	59.6	151	98	13	17	2.90	46.90	230.60	3.56	1.34	22	0.80	2.48
尚成凤	1	46	5.35	87	160	59.3	119	66	6	16	4.20	49.00	280.90	4.41	1.34	11	1.51	2.34
詹亚飞	2	34	4.72	88	179	56.3	129	75	18	20	5.80	69.90	428.30	4.19	0.68	21	1.38	2.45
张伟	1	33	5.43	88	164.5	96.4	136	89	70	65	5.50	48.30	340.30	5.67	1.82	14	1.30	3.80
李畅	1	31	3.93	72	159.5	58	89	60	12	18	2.79	53.20	316.00	6.22	0.97	13	1.54	4.01
云肖	2	35	4.99	74	160	66.3	114	75	14	17	3.90	69.40	396.20	4.14	0.76	26	1.14	2.60
刘露	1	28	4.11	82	163.5	55.6	107	63	12	18	4.71	53.70	309.50	4.93	0.75	10	1.70	2.99
姚转运	1	40	5.30	75	161.5	58.4	111	58	13	16	4.30	47.90	237.60	5.74	1.44	19	1.10	3.91
刘盼盼	1	36	4.51	81	169.5	71.3	110	75	21	15	5.90	49.40	276.10	5.39	1.53	18	1.00	3.38
张峰	2	45	5.46	81	172	84.9	153	99	17	20	6.08	66.90	334.80	4.79	4.10	24	0.87	3.02
赵静	1	38	4.47	98	170	85	146	88	20	18	2.90	44.10	217.40	4.77	2.17	27	1.19	3.24
崔小亚	1	31	3.35	96	165.5	48.9	106	60	19	23	4.90	73.00	326.30	6.22	1.20	20	2.19	3.73
徐新红	1	37	4.97	79	164.5	60.2	113	66	16	21	5.00	73.00	329.90	4.63	0.70	21	1.76	2.74
陈鹏飞	2	32	5.56	71	165	65.6	129	76	179	66	7.40	76.30	443.90	6.49	1.18	43	1.55	4.39
朱婷婷	1	32	5.05	93	160.5	56.3	120	81	12	17	3.47	50.30	199.70	4.90	0.79	9	1.58	2.95
李新江	2	46	5.71	81	173	79.6	131	80	34	19	5.50	77.40	488.40	4.40	1.73	30	1.03	2.93
李国平	2	33	5.05	82	174	82.7	122	82	10	19	6.20	64.40	416.30	5.16	4.27	45	1.38	3.22
周雷	2	40	4.83	85	166	62.5	131	90	62	39	5.20	79.70	452.40	5.57	2.36	140	1.09	3.63
来慕昊	2	37	6.13	69	178.5	79.2	133	95	18	21	4.30	86.00	355.20	7.31	0.86	33	2.07	4.65
刘孟雨	1	30	5.71	96	弃检	弃检	127	85	17	20	4.40	55.00	258.90	4.79	1.28	23	1.06	3.13
焦伟勤	1	34	4.89	90	156	47.9	125	74	12	21	4.72	48.40	271.90	4.01	0.76	12	1.49	2.36
桑若岚	1	31	5.30	89	161	66.7	113	62	9	15	4.70	52.20	217.00	4.60	0.71	15	1.34	2.84
王静	1	33	5.33	72	168.5	93.9	128	74	48	39	4.10	47.00	257.60	4.00	2.16	42	0.91	2.67
李鑫	1	38	3.92	82	162.5	56.6	106	71	21	23	4.18	47.10	263.20	4.20	0.56	12	1.51	2.50
周汝航	2	38	4.47	78	173	64.5	130	88	11	19	4.32	79.90	420.60	4.88	0.80	20	1.45	3.15
邓汝淇	2	34	5.47	94	178	72.7	157	89	21	22	5.10	72.90	524.50	6.68	2.80	28	1.28	4.31
尹智明	2	34	4.92	77	181	89.4	113	69	56	34	4.84	59.90	432.20	4.42	2.29	28	0.98	2.68
姚雪	1	23	5.07	102	161.5	70.7	103	73	11	16	4.00	51.10	246.10	4.37	1.30	12	0.87	2.99
程园园	1	33	4.65	72	160.5	67.7	108	70	11	21	4.60	48.60	251.90	4.51	1.24	13	1.53	2.70
胡杨	1	33	5.26	72	162	67	122	76	78	44	4.89	55.90	278.50	4.24	1.09	15	1.15	2.80
倪媛	1	33	4.94	101	157	51.9	117	78	10	21	2.80	52.90	279.80	4.82	1.03	13	1.29	3.04
孟阳	1	36	4.34	79	164	61.4	127	73	13	19	4.55	48.90	320.40	5.69	0.91	12	1.54	3.73
张凯伦	1	31	4.49	81	165.5	51.4	114	68	18	27	7.20	72.20	274.80	7.75	0.74	10	1.90	5.50
葛洪峰	2	46	4.58	80	168	62.3	108	66	20	27	4.00	68.40	409.80	5.69	1.40	24	1.13	4.29
于雪梅	1	33	4.93	82	165	53	124	80	19	21	3.26	49.40	194.60	4.65	0.62	11	1.35	2.97
楚海亮	2	38	5.35	74	170	78.9	121	82	23	20	5.09	71.90	341.00	4.75	2.06	30	1.10	3.07
纪晓娟	1	38	4.20	72	165	58.3	117	68	9	19	3.61	63.70	294.60	5.16	0.60	12	1.59	3.35
聂小敬	1	40	5.60	88	158	55	123	62	10	19	4.30	44.50	250.50	4.24	0.83	13	1.13	2.84
张司琪	1	31	4.35	72	162	53.7	110	75	28	28	4.20	44.70	237.40	5.28	1.38	29	1.13	3.66
王其凯	2	31	4.73	83	170	87.3	127	75	21	18	3.40	52.80	360.80	4.29	0.71	21	0.87	3.16
王闪闪	1	32	4.89	77	155	59.3	114	72	15	20	4.70	47.80	156.30	5.80	0.75	23	1.51	3.91
唐艳霞	1	35	5.02	92	159	45.8	102	63	15	23	6.50	50.90	277.10	5.27	0.64	17	1.77	2.77
李敬敬	1	31	5.05	103	165	56.4	143	84	14	20	3.60	44.30	244.50	5.07	1.02	12	1.38	3.24
邵文侠	1	41	4.87	71	弃检	弃检	126	79	15	17	3.55	51.00	208.80	4.48	0.96	22	1.35	2.88
周用谋	2	37	4.63	73	172.5	75.8	119	76	30	24	5.45	64.30	434.60	4.45	1.14	21	1.19	2.90
黄继化	2	48	5.55	71	169.5	79.1	135	81	23	26	5.50	73.10	361.50	5.39	2.35	33	1.04	3.60
聂连立	2	40	4.27	78	178.5	67.3	145	87	40	37	5.60	84.80	444.00	5.66	1.40	59	1.33	3.91
王利	1	35	4.18	79	164	61	113	66	7	14	4.60	62.60	401.80	2.93	0.63	14	1.41	1.40
李冰冰	1	33	5.01	88	弃检	弃检	102	75	19	18	5.40	41.90	211.40	5.43	1.53	15	1.15	3.77
张莉娟	1	37	5.05	89	161	51	116	77	19	26	5.00	44.50	263.30	4.83	0.50	13	1.34	3.09
秦蕊	1	38	4.92	85	150	52.2	120	76	14	24	4.70	58.40	242.80	3.93	0.87	18	1.04	2.66
黄延	2	33	4.37	82	175.5	62.8	98	59	10	19	3.87	69.30	353.90	2.98	0.47	13	1.24	1.69
侯萍	1	35	5.86	76	156.5	64.8	104	65	11	17	3.20	46.30	260.40	3.56	0.89	17	0.77	2.42
张启航	2	35	4.71	90	169.5	72.1	137	88	14	19	6.20	71.50	412.00	4.81	1.14	23	1.10	2.83
邢晓勤	1	35	4.84	76	160	65	109	71	19	19	4.20	46.90	240.80	4.25	0.46	16	1.24	2.71
吴炜	2	47	6.04	88	169.5	82.3	124	85	32	23	5.50	53.10	325.00	7.03	5.38	127	1.24	4.19
陈静雯	1	30	4.98	87	159.5	55.8	106	70	6	13	3.20	48.40	206.80	3.26	0.65	13	1.05	2.00
刘飞	2	54	5.15	89	166	60.2	135	90	20	21	10.04	78.00	284.80	8.35	1.56	59	1.35	6.09
马蒙	1	36	4.38	69	158.5	55.5	123	78	10	15	2.94	46.70	276.70	4.15	1.03	12	1.22	2.56
刘汉辉	2	39	5.17	68	171	68.3	119	78	27	29	5.52	73.90	368.80	4.30	0.86	41	1.30	2.79
汪洋洋	1	34	5.20	87	160	55.9	134	87	17	15	4.20	50.20	305.50	4.31	1.26	19	1.23	2.69
韩飞飞	2	35	7.28	72	178	95	151	96	20	25	6.88	81.10	349.80	5.88	2.58	44	1.20	3.96
吴小萍	1	37	4.72	93	169.5	68.3	113	69	11	18	4.40	52.80	222.60	5.31	1.97	15	1.05	3.56
周荣	1	49	6.30	103	154.5	57	161	102	31	33	3.50	52.40	238.20	6.11	1.59	25	1.52	3.88
李丽娜	1	38	5.25	110	163	54.9	137	100	14	24	3.00	53.20	318.60	5.84	2.01	11	1.53	3.63
韩菲	1	33	5.71	110	弃检	弃检	163	98	43	25	5.10	42.90	425.20	6.00	2.58	52	1.05	4.20
李华峰	2	36	4.56	91	183	97.3	124	76	17	22	6.14	86.10	426.80	5.61	5.69	20	1.06	3.45
李雪萍	1	37	4.65	72	157	47.9	124	69	14	25	3.80	54.90	309.10	5.57	0.86	19	1.42	3.82
曹露文	1	35	4.92	80	158.5	51.8	109	68	13	16	2.92	51.90	229.40	3.35	1.02	12	1.07	1.96
吴娜	1	37	5.46	83	163	66	120	75	16	19	3.22	50.20	244.60	4.67	0.83	12	1.25	3.02
曹辉	2	31	4.91	77	169.5	76.9	118	77	36	21	5.20	65.20	300.30	4.61	0.83	30	1.12	3.08
王君实	2	32	4.28	86	183	65.8	109	83	15	22	4.00	58.20	324.40	5.05	0.77	18	1.65	2.80
薛高洁	2	36	5.54	84	171.5	78.4	151	97	38	28	6.20	69.60	353.20	5.01	2.36	95	1.07	3.26
刘忠臣	2	32	4.56	72	172.5	70.8	134	74	23	23	5.66	84.80	464.00	3.91	2.28	18	1.10	2.39
秦晓雯	1	34	4.51	97	165	57.3	110	77	11	20	3.90	51.20	330.40	4.34	0.87	16	1.40	2.60
朱晓倩	1	35	5.11	73	169	58.5	114	71	10	18	5.10	50.20	259.70	5.12	0.67	12	1.39	3.38
王晓玲	1	40	4.35	59	167.5	64.5	100	66	14	16	4.70	69.20	348.10	4.13	0.42	15	1.46	2.56
赵玲	1	55	8.39	89	156	60.8	142	86	217	181	4.10	46.60	257.20	8.76	2.21	165	1.39	6.34
高靖	2	31	5.28	95	177	71	128	77	22	21	4.06	74.40	475.80	5.79	2.63	29	1.30	3.79
张建军	2	46	4.84	66	174.5	78.4	121	77	22	28	5.20	70.40	323.30	6.40	1.07	14	2.14	3.80
马赛	1	36	6.05	95	160.5	58.6	128	75	15	19	4.70	53.40	264.70	5.64	0.81	16	1.55	3.72
刘雨生	2	33	5.56	68	175	76	115	74	54	29	4.80	65.90	347.00	5.27	1.11	40	1.28	3.34
孟依依	1	28	5.10	98	168.5	81.3	137	94	32	20	3.20	50.10	293.30	6.06	2.22	38	1.14	4.23
张红	1	47	3.72	74	167.5	54.8	125	93	10	20	3.36	65.40	278.50	4.66	1.00	11	1.45	2.88
张静	1	44	4.75	94	153	49.1	143	98	11	18	6.20	45.50	228.00	4.32	0.53	28	1.51	2.56
张璐	1	39	4.94	92	166	58.5	126	75	23	23	4.24	51.80	277.60	4.53	1.01	18	1.52	2.80
梁冰玉	1	42	4.45	87	165	52.8	92	63	13	20	1.97	40.20	182.10	5.98	0.80	17	1.75	4.20
李维	2	52	4.32	79	173.5	84.9	133	78	18	18	3.56	77.70	429.30	5.84	1.47	25	1.48	3.90
孙佳伟	2	27	4.91	90	170	59.3	147	83	19	27	5.20	79.30	357.60	6.08	0.61	17	2.01	3.76
李俊杰	2	37	6.80	76	173.5	89.3	156	100	27	28	3.61	54.70	363.40	5.64	1.64	58	0.94	4.11
侯雯莉	1	31	5.49	71	173	73.9	113	72	26	27	3.90	57.00	268.10	4.64	0.61	45	1.11	3.15
朱旭	2	33	5.51	83	170.5	75.3	122	86	28	23	6.70	73.60	386.70	5.04	1.40	52	0.93	3.53
赵蒙蒙	1	29	5.15	97	163.5	56.9	117	80	19	19	4.10	46.10	264.60	5.68	0.58	13	1.85	3.63
马晴缘	1	23	4.97	71	163.5	59.6	121	77	17	19	4.10	42.80	232.30	3.41	1.03	19	1.10	2.11
刘小妮	1	29	4.99	89	159.5	64.4	116	87	17	23	4.02	45.80	304.60	4.49	1.26	12	1.09	2.95
王亚飞	2	28	5.37	83	181	82.2	129	86	26	21	5.47	72.90	209.70	6.32	1.97	26	1.20	4.50
侯轩轩	1	27	4.65	100	162.5	69.9	127	95	12	18	3.06	47.50	252.80	5.07	1.04	11	1.45	3.25
李前前	2	40	9.77	68	176	71	130	79	14	16	5.69	51.00	133.50	4.34	1.13	15	1.22	2.83
张洋洋	1	35	4.64	88	163.5	58.3	107	69	24	38	3.40	44.30	323.20	4.78	1.12	61	1.25	3.08
白田田	1	37	4.54	87	169	66.1	107	60	10	15	5.34	51.10	205.70	4.40	0.74	12	1.85	2.37
胡飞龙	2	37	5.21	72	176.5	74	138	85	13	25	4.60	66.50	374.40	5.44	0.67	22	1.64	3.53
邓坤	1	36	7.04	100	161	71.1	143	93	40	23	3.44	43.40	274.80	5.66	2.59	30	0.76	4.04
朱梅	1	41	4.24	83	151.5	50.8	100	80	12	17	4.16	45.20	160.90	5.53	0.56	11	1.84	3.12
王永军	2	42	5.27	68	174.5	80.2	116	71	41	31	5.60	60.20	383.40	5.62	2.12	82	1.32	3.27
张彭举	2	35	4.71	64	177	74.3	140	103	15	25	5.30	68.30	367.40	5.46	1.29	32	1.52	3.46
李梅	1	49	4.91	87	156	70.3	148	86	15	21	3.20	50.20	262.70	6.35	1.57	15	1.95	3.86
张建飞	2	53	5.65	85	160.5	80.4	124	77	20	21	5.54	91.90	361.70	6.27	1.72	21	1.16	4.42
何甜	1	35	5.07	62	162	55.3	124	50	15	16	5.20	50.90	159.00	3.83	0.49	18	1.58	2.12
秦祥祥	2	33	5.55	76	174.5	85	124	78	26	20	4.55	64.20	422.60	3.64	0.88	51	0.96	2.39
高振伦	2	49	5.13	92	166	64.3	122	88	18	28	6.60	86.50	393.50	6.18	1.06	16	1.42	4.23
闫良	2	59	4.97	80	171	84.5	103	72	31	30	4.81	68.10	361.60	3.68	1.32	47	1.16	2.32
郝树立	2	58	4.42	69	165.5	69.9	147	89	16	17	4.12	69.90	479.50	6.27	1.91	47	1.83	4.21
杨鹏飞	2	44	4.37	68	172	76.5	128	84	15	21	5.60	58.00	447.90	4.76	1.36	16	1.25	2.81
李绚	1	37	4.62	52	165.5	59.7	104	58	9	17	3.82	50.50	355.30	5.21	0.76	13	1.23	3.62
王涛	2	34	5.43	95	183.5	85.9	144	94	27	21	4.70	61.00	373.60	6.29	1.25	52	1.12	4.46
锁莉	1	44	4.95	76	168	69.2	129	79	17	26	3.21	44.80	217.10	4.65	1.20	25	1.27	2.95
闻勤	1	51	5.39	66	156	61.5	122	79	17	23	5.61	61.60	289.40	3.93	0.75	12	1.39	2.32
周江舟	2	46	5.30	87	168.5	62.1	127	78	22	24	5.50	61.20	428.00	7.17	3.67	18	1.34	4.80
赵晓鹏	2	35	4.60	95	182	79.7	113	71	16	22	3.72	74.90	218.30	4.87	1.54	14	1.10	3.26
昝曼利	1	37	4.84	72	171	59.3	115	57	8	11	4.30	54.90	237.30	5.35	0.74	10	1.66	3.58
邢思危	1	39	6.65	87	161.5	77.8	141	109	13	18	4.60	56.30	244.80	5.01	4.13	23	1.04	3.35
蒋昭雨	1	35	4.22	66	155	53.7	106	63	13	21	3.83	46.90	194.60	6.98	1.25	9	1.26	5.05
李慧芳	1	32	4.88	86	166.5	59.5	107	70	12	18	3.70	61.40	268.00	4.22	1.20	9	1.21	2.67
朱颖	1	32	5.05	99	165.5	56.2	114	82	12	16	3.66	56.90	171.80	4.52	0.67	9	1.29	2.93
李保山	2	46	5.26	125	165	71.8	82	65	25	21	4.55	59.70	423.30	4.81	2.66	100	1.13	3.03
王翠芳	1	38	5.20	66	160	58	87	63	11	16	3.90	53.30	284.70	4.41	0.56	15	1.20	2.85
张婷婷	1	34	4.74	89	158	54.2	117	82	12	16	3.79	48.70	255.70	3.49	0.96	17	1.25	2.04
袁强强	2	32	5.26	102	178.5	89.2	131	76	28	16	4.80	62.70	484.80	5.76	1.61	40	1.47	3.46
宋丁燕	1	39	5.41	88	157.5	48	111	64	14	23	5.80	51.90	266.80	5.14	0.86	22	1.73	3.02
潘素勤	1	39	5.23	81	162	62	141	94	18	23	5.20	53.60	253.30	3.76	0.97	16	0.96	2.45
吴震	2	29	4.89	70	177.5	75.2	117	67	24	21	5.78	73.90	229.80	4.76	0.89	27	1.36	3.10
崔利利	1	34	5.16	86	158.5	63.9	101	62	11	16	3.30	49.20	225.00	4.71	0.59	33	1.21	3.17
赵锋	2	40	4.30	88	171.5	83.1	132	98	23	21	4.64	61.80	386.40	4.86	2.08	26	1.03	3.32
吕翠红	1	31	4.68	82	159.5	48.8	98	44	10	15	3.20	45.80	260.00	3.59	0.53	11	1.19	2.14
杨桐桐	1	31	5.66	72	162	61	110	63	14	19	2.81	40.40	185.10	4.51	0.86	20	1.52	2.78
李玉娟	1	32	5.01	93	167.5	57.7	104	67	12	18	4.60	44.20	260.60	4.64	0.85	12	1.26	3.01
唐俊雅	1	30	4.78	86	150	61	110	71	13	20	3.00	48.70	402.80	5.08	1.14	18	1.20	3.43
李萌萌	1	43	5.88	107	152	61.2	189	97	18	20	4.10	57.70	296.70	3.83	1.12	35	1.49	2.34
张秀芳	1	56	5.41	94	148.5	54.4	119	84	23	29	4.50	56.00	306.10	4.76	1.09	33	1.45	3.01
王欢	1	35	4.82	82	156	46.7	123	84	36	34	5.00	43.70	249.30	3.85	0.65	12	1.55	2.22
张颖	1	39	4.55	88	163	56.1	127	74	20	21	2.48	45.50	229.90	4.54	0.83	31	1.73	2.62
宋利利	1	37	5.25	82	163.5	69.5	99	61	10	16	4.46	45.10	258.10	5.62	1.53	12	1.27	3.70
程倩	1	37	4.29	91	159.5	48.6	102	67	14	20	3.90	48.00	203.00	5.36	0.56	16	1.55	3.24
朱乾威	2	39	4.40	72	171	69.3	117	79	28	29	4.87	71.70	304.50	3.48	0.88	17	1.52	1.81
鞠慧	1	33	5.76	81	166	63.4	125	76	34	26	4.73	95.10	360.90	3.90	2.48	44	0.88	2.34
杨雁秋	1	29	5.37	78	164	54	129	77	12	18	2.90	40.70	239.40	3.28	0.64	19	1.40	1.87
田玉华	1	33	5.92	99	155	70	127	86	89	44	3.60	36.40	351.50	5.01	2.07	138	1.03	3.69
孙丹丹	1	32	4.99	76	163.5	75.7	124	71	32	28	3.20	50.60	215.10	3.19	0.70	74	1.00	1.83
周影	1	31	5.36	82	157	49.4	133	82	9	20	3.60	63.50	290.90	4.65	0.92	10	1.12	3.22
徐珊珊	1	36	5.40	75	161.5	65.6	153	94	20	30	3.79	57.50	314.80	3.57	0.82	16	1.42	2.06
张永辉	2	48	5.35	73	165.5	74	119	71	21	28	3.50	65.20	381.40	3.72	1.44	25	0.97	2.47
陈阳	1	36	5.40	82	166	74	130	82	24	29	3.50	57.40	322.00	4.99	1.56	39	1.38	3.49
王静	1	37	5.45	70	157.5	64.5	114	70	24	23	5.80	53.70	348.10	5.26	1.53	20	1.07	3.73
崔啸虹	1	35	4.97	97	159.5	53	112	75	12	16	5.80	50.70	174.70	5.12	1.38	16	1.42	3.27
王梦娜	1	39	5.06	66	154.5	60.1	183	88	18	30	4.97	58.90	262.80	5.99	2.15	16	1.42	3.94
朱海燕	1	39	4.34	91	154	60.6	131	86	18	27	5.04	50.20	311.30	5.60	2.46	26	1.17	3.57
兰峰	2	37	5.94	85	179	66.7	111	77	59	35	4.10	60.70	287.50	4.98	0.78	18	1.28	3.02
丁燕妮	1	33	4.42	80	161	52.4	95	56	19	18	4.80	53.70	220.80	4.19	0.65	16	1.49	2.57
马春梅	1	37	4.37	70	154	57.5	96	73	12	17	3.38	45.70	305.40	3.88	1.32	12	1.02	2.76
李京京	1	30	4.75	99	162	54	116	77	13	20	4.48	52.90	318.90	5.55	1.63	13	1.62	3.50
吴媛媛	1	29	4.80	84	164.5	62.9	140	98	16	20	5.60	40.20	229.80	4.31	0.71	14	1.38	2.65
赵小娟	1	28	5.15	76	164.5	57.7	132	83	6	14	4.43	56.90	261.70	4.51	0.82	10	1.44	2.79
郭允灵	1	28	5.44	79	165.5	72.9	142	87	25	22	4.00	57.70	277.50	4.25	2.11	18	0.83	2.86
李晓敏	1	30	4.71	89	169	60.3	136	86	12	19	2.70	43.40	227.10	5.05	0.76	13	1.54	3.03
张波	2	51	5.13	73	163.5	56.8	128	85	23	21	4.50	64.50	334.80	5.40	1.22	46	1.61	3.37
吴倩	1	37	4.56	76	161.5	60	124	63	10	13	4.90	55.30	233.00	3.41	0.76	12	1.17	2.09
周灵岩	1	35	5.19	77	165	58.9	115	58	13	18	5.20	63.90	330.90	4.33	0.75	17	1.73	2.49
蒋成玲	1	37	4.82	84	156.5	66.1	130	93	11	19	2.60	47.80	272.40	5.59	1.14	16	1.54	3.57
马国旗	2	39	5.17	67	167	71	154	99	17	23	5.80	73.60	229.80	6.04	1.13	16	1.73	3.81
盛银	1	32	4.44	97	弃检	弃检	128	85	12	18	4.90	68.70	229.40	4.22	0.97	16	1.24	2.68
高雨蕊	1	33	4.90	88	160.5	49	125	84	12	22	3.80	48.10	332.40	3.48	0.49	15	1.13	2.16
金晨	1	31	5.28	90	弃检	弃检	115	69	17	18	6.20	41.80	263.40	4.71	1.01	15	1.31	3.02
孙青	1	39	3.73	78	159	53.7	90	63	9	15	4.97	60.00	300.60	4.97	0.78	9	1.65	2.99
崔莹	1	30	4.92	94	164.5	79.1	108	74	29	20	4.83	46.90	271.80	5.16	1.03	128	1.72	3.36
马凯利	1	28	4.87	72	165.5	58	118	72	48	37	4.70	40.90	168.00	3.72	0.52	12	1.53	2.08
程刚	2	41	4.72	87	165	65	130	90	16	20	4.00	59.30	292.00	5.30	1.12	17	1.20	3.28
杨培	1	39	4.55	79	弃检	弃检	120	73	11	21	2.90	39.60	225.30	4.14	0.64	13	1.54	2.13
张华鹏	2	43	4.21	97	172	88.9	117	75	13	20	5.66	84.00	427.90	5.05	1.49	18	1.23	3.29
冯翠影	1	41	5.13	64	166	55.8	123	82	10	15	4.57	30.80	140.70	4.76	4.90	11	1.01	2.74
潘腾莉	1	35	6.06	76	163.5	65.5	131	77	20	24	4.67	47.90	215.60	4.34	0.64	21	1.45	2.74
霍香莹	1	34	4.05	109	157.5	47.7	116	68	11	18	4.10	54.90	235.40	4.81	0.65	13	1.87	2.85
鲁洁	1	37	4.92	80	173	67.2	113	71	66	29	4.90	54.50	285.50	4.13	0.82	17	0.88	2.97
王慧芳	1	32	5.68	69	160	56.5	105	63	19	29	5.60	45.00	298.90	6.30	2.86	29	1.40	3.96
武婉婉	1	36	5.22	81	166	73.3	123	73	22	21	6.03	56.70	263.20	4.12	0.66	11	1.52	2.47
徐静	1	35	5.08	112	166	53.4	119	81	15	20	6.20	50.80	241.50	3.99	0.47	13	1.54	2.36
罗莹莹	1	34	4.78	87	167	51.9	118	67	20	24	6.10	49.90	177.30	4.62	0.56	23	2.02	2.61
赵欣	1	34	5.56	92	161	57	118	75	11	16	5.80	54.20	218.60	4.21	0.82	11	1.40	2.70
詹飞祥	2	33	4.28	67	184	74.2	133	74	22	22	6.70	74.10	371.70	5.82	1.66	24	1.56	3.97
朱皖皖	1	33	5.10	80	161.5	58.8	125	74	22	25	3.00	50.10	181.60	3.57	0.55	14	1.25	2.31
张俊俊	1	34	4.85	84	164.5	82.3	110	72	27	21	5.70	55.00	318.40	4.94	2.27	33	0.76	3.34
石艳	1	30	5.02	81	165	65.5	128	76	33	35	5.62	54.90	312.00	6.06	1.67	14	1.74	3.87
屈乔影	1	43	5.19	74	161.5	56	110	70	11	15	5.10	44.40	164.70	5.06	1.14	11	1.76	3.13
王瑞	1	33	4.76	73	164	54.8	111	80	11	18	3.55	64.30	245.90	4.76	0.64	14	1.69	2.94
赵红庆	1	36	5.30	86	弃检	弃检	124	78	26	21	3.90	48.10	280.60	5.35	1.51	20	1.10	3.72
赵世界	2	35	5.08	79	170.5	86.6	126	63	19	21	6.30	81.10	313.90	5.71	1.66	28	1.21	3.90
付晴	1	32	7.33	77	弃检	弃检	123	72	28	25	4.34	33.90	286.10	4.35	2.41	146	0.96	2.95
李雨晴	1	32	5.15	87	166.5	57.7	121	75	14	17	3.42	43.20	232.50	4.64	1.48	14	1.23	3.05
孙高	2	34	4.55	74	177	83.1	118	77	26	21	4.50	73.30	386.90	5.70	2.95	16	1.12	3.77
丁锐	2	33	5.62	87	178.5	76.6	128	89	14	21	7.00	63.70	350.10	4.94	0.85	21	1.59	2.99
胡影影	1	34	4.38	81	164	49.3	99	65	10	18	2.87	54.90	259.50	4.51	0.63	23	1.28	2.89
范丽萍	1	32	5.12	82	165	60.6	119	69	8	16	4.10	51.60	249.80	4.97	0.94	14	1.61	2.63
王亚莉	1	32	4.73	83	弃检	弃检	121	77	18	16	4.53	56.90	298.00	5.25	0.72	11	1.10	3.58
李丽伟	1	34	4.70	88	160.5	53.9	107	73	17	20	3.99	45.10	280.40	4.05	0.68	16	1.39	2.46
乔磊	1	49	4.41	85	162.5	60	102	58	16	16	3.70	46.70	359.90	5.09	0.96	20	1.19	3.36
胡玉珍	1	37	5.62	69	161	59.8	115	67	13	16	4.20	60.30	310.90	5.49	0.62	17	1.34	3.28
徐志强	2	56	5.12	55	162	83.8	125	80	24	21	5.20	75.10	385.80	5.55	1.84	17	1.20	3.73
张涛	2	51	4.87	81	175.5	82.7	147	83	23	23	6.67	71.90	389.10	5.23	3.50	25	1.17	3.33
赵高峰	2	43	4.35	80	173.5	84.2	135	100	17	27	4.18	58.10	340.80	4.45	0.98	36	1.21	2.93
马立胜	2	42	5.44	70	174.5	98.2	148	93	29	26	6.10	68.30	338.30	5.04	2.82	28	1.20	3.26
倪红玲	1	49	4.95	91	161	64.4	121	68	16	21	3.69	52.00	324.10	4.10	1.04	15	1.41	2.33
王鹏飞	2	42	6.54	95	170.5	79.7	125	71	41	23	4.28	50.80	649.00	5.02	3.69	77	0.94	3.40
杜闫伟	2	32	4.25	75	175	89.4	140	86	41	33	7.50	86.70	601.10	4.80	2.17	147	0.94	3.27
袁媛	1	45	5.53	80	157.5	60.1	125	88	15	15	5.07	51.20	282.20	4.77	0.62	12	1.52	3.17
赵晶	2	36	4.61	71	174.5	76	131	81	28	26	7.12	76.50	471.80	6.70	3.51	27	1.26	4.40
陈杰	1	35	4.41	81	153	60.8	89	59	13	19	4.36	74.40	301.50	4.01	1.00	17	1.20	2.43
杨东侠	1	54	4.27	54	155	43	118	63	13	27	5.20	47.80	196.30	4.23	0.75	14	1.59	2.52
张艳	1	39	4.36	92	167.5	54.4	89	68	14	20	3.50	48.40	302.30	5.37	1.55	16	1.48	3.35
朱撼宸	2	31	5.08	74	178.5	97	132	88	14	18	4.00	74.30	440.90	5.06	1.87	18	0.84	3.50
张倩	1	32	3.88	90	167.5	54.8	112	65	13	17	3.15	59.20	298.60	4.53	0.74	14	1.80	2.70
孟献申	2	57	5.24	57	173	79.1	115	72	20	23	6.70	69.40	382.00	5.45	1.86	25	1.39	3.43
洪锋	2	57	4.62	71	165.5	66.1	130	82	16	25	4.82	64.20	328.10	4.76	0.70	16	1.75	2.90
姚玉芳	1	60	5.62	72	159.5	64.2	123	73	13	21	3.80	40.80	273.50	5.85	0.98	15	1.44	3.53
韩若东	2	39	5.70	78	182	78.3	148	85	31	21	4.10	66.30	358.50	4.99	0.97	28	1.34	3.27
艾辉	2	40	6.15	68	179.5	92.1	126	78	32	24	6.76	65.80	498.90	4.50	1.57	44	1.38	2.89
吴鹏	2	40	5.44	95	171	63.7	141	84	31	28	4.20	70.90	356.80	5.52	1.05	24	1.63	3.60
王伟	2	36	5.09	92	174	69.1	127	74	38	26	7.10	72.50	402.90	5.46	1.79	52	1.24	3.62
景西峰	2	36	5.10	87	174	88.1	127	71	49	41	5.60	62.50	404.50	4.65	1.96	24	1.14	3.09
李博文	2	36	5.14	101	182	86.1	119	73	46	29	5.20	75.20	425.70	4.76	1.70	52	1.18	3.33
蒲昆鹏	2	42	6.05	89	167.5	68.2	155	102	29	25	6.58	77.40	417.10	4.81	2.50	81	1.16	3.22
孙杰	2	40	4.65	75	181.5	84.5	151	91	29	22	4.98	65.40	383.50	5.30	1.16	31	1.19	3.33
杨鑫	2	40	5.15	64	174.5	89.4	131	87	24	19	5.38	74.90	533.60	5.47	0.94	68	1.35	3.74
张友桂	2	44	5.44	62	173	76	121	78	23	26	4.90	76.30	360.20	3.61	1.05	21	1.16	2.31
杜文杰	2	43	5.47	80	166.5	62.9	186	83	15	19	5.84	58.20	288.90	6.57	0.69	22	1.69	4.33
刘辉	2	39	4.10	69	168	74	115	85	14	18	6.75	78.10	380.90	4.37	1.86	21	1.16	2.83
周鹏飞	2	35	4.94	83	174	67.2	136	98	18	20	5.51	64.50	247.60	3.87	0.65	19	1.35	2.21
付杰	2	38	5.47	85	174	87	142	79	40	31	4.90	61.20	396.80	5.32	2.28	45	1.13	3.43
尹标	2	35	5.87	74	170	66	110	72	34	25	3.90	66.30	280.80	6.71	1.05	25	1.41	4.05
程杰	2	36	4.48	75	179.5	83.3	149	108	24	22	5.38	78.40	437.20	4.40	2.07	30	1.21	2.62
马标	2	39	4.99	86	171	80.7	143	90	16	21	5.30	72.50	344.00	5.31	1.11	34	1.67	3.33
王峰	2	35	4.70	69	169	65.7	120	78	14	19	4.70	71.80	323.10	5.63	1.22	20	1.69	3.62
梁科科	2	35	5.08	72	172.5	68.9	121	77	23	25	5.30	81.70	273.20	4.35	1.74	32	1.04	2.84
吴迪	2	40	5.56	73	168.5	69.8	132	82	68	35	6.45	65.20	309.40	5.45	0.92	28	1.55	3.54
李奇	2	38	5.03	78	175	92.6	130	86	62	34	4.75	75.60	428.70	4.86	3.25	77	0.93	3.28
邱涛	2	36	4.38	76	169.5	79.7	123	81	17	17	5.50	81.00	457.70	5.61	0.89	27	1.35	3.95
董洪智	2	52	4.48	58	164.5	66.4	139	84	13	17	6.60	74.50	455.80	6.74	1.10	14	1.45	4.06
解凤磊	2	38	4.81	79	160	65.9	138	96	28	26	5.40	70.00	328.60	3.98	1.07	26	0.99	2.65
夏万昱	2	39	6.21	80	174.5	60.4	130	80	18	16	3.60	62.10	348.30	4.15	1.63	23	1.18	2.32
张传峰	2	35	5.68	78	173	83.7	140	84	75	35	3.70	74.00	404.80	5.96	1.10	42	1.03	4.34
金祥福	2	52	5.35	77	166	68	132	90	14	20	5.70	67.70	243.10	5.03	0.85	26	1.33	3.28
柴大林	2	40	4.81	77	163	78.7	133	86	45	28	5.10	74.90	482.80	5.54	3.06	39	0.99	3.77
闫金亮	2	39	5.50	83	185	86	118	75	18	23	4.53	78.20	359.80	4.96	1.83	22	0.84	3.59
张玉新	2	35	5.27	84	168.5	72.1	117	76	15	18	5.30	58.40	307.20	5.54	0.79	18	1.33	3.85
李根	2	42	7.02	95	178	80	136	89	57	28	6.60	60.30	382.00	5.20	2.44	60	1.10	3.64
刘军	2	40	4.32	83	172.5	67.7	122	80	14	21	3.85	39.80	233.40	4.76	0.95	32	1.58	2.92
胡焱	2	38	6.40	76	170	78	133	89	33	27	5.70	79.50	431.10	6.46	1.86	41	1.00	5.03
代春华	2	52	5.56	67	171.5	81.8	132	97	39	27	6.50	74.90	359.00	3.04	1.90	30	0.90	1.90
胡猛	2	38	4.71	79	173.5	74.7	125	84	20	24	5.00	83.50	536.50	4.91	1.43	14	1.25	3.20
范强强	2	37	5.24	92	173	83	131	82	36	49	4.20	65.60	629.50	5.75	1.64	143	1.05	3.55
杜岳	2	37	5.48	84	172.5	71.8	116	85	14	20	3.80	72.50	310.10	4.06	0.86	17	0.99	2.57
邓洪义	2	54	4.77	72	162	62.8	119	68	15	19	4.40	64.70	320.10	4.07	0.38	20	1.33	2.65
汪从祥	2	49	4.12	62	178	93.9	168	115	35	32	5.10	99.80	391.10	4.47	1.08	21	1.30	2.77
周光廷	2	41	4.79	64	175	88.6	122	74	34	31	3.70	77.30	445.50	5.53	1.42	40	1.38	3.82
赵杰	2	41	5.13	82	178.5	80.3	130	76	26	27	4.99	64.70	292.90	5.17	1.55	18	1.41	3.42
周贤平	2	35	5.38	86	169.5	71.2	112	72	35	26	5.29	60.20	472.40	5.12	1.05	28	1.58	3.13
张峰	2	45	5.10	88	177	70	131	89	19	28	6.30	81.50	391.10	6.05	0.97	28	1.25	4.00
赵延大	2	38	4.32	82	171	64.3	119	78	24	34	9.30	64.00	183.50	5.75	0.65	12	1.66	3.89
李志刚	2	51	12.40	96	160	72.2	126	83	18	20	4.10	51.20	314.70	4.98	1.18	27	1.29	3.35
徐永洪	2	65	8.24	72	170	74.3	144	87	12	15	7.80	48.50	333.30	4.25	1.39	22	1.20	2.90
孙新民	2	67	9.66	63	152.5	59.9	147	76	16	16	7.44	36.60	314.30	3.61	1.13	15	1.10	2.31
杨亚辉	2	65	5.89	71	170.5	70.9	129	71	18	25	4.72	61.40	424.30	6.13	1.07	32	1.53	4.40
龚江宁	2	70	5.55	91	166.5	85.3	107	63	17	17	8.45	88.30	641.80	6.33	1.07	28	1.53	4.33
闫中峰	2	69	5.54	74	165.5	90.2	155	86	51	38	5.47	54.10	413.70	4.87	1.83	33	1.41	2.95
孙玉元	2	68	6.30	60	164	59.8	113	57	9	16	6.30	79.40	405.70	4.19	0.97	14	1.05	2.55
闫朝民	2	71	5.60	80	171	71.8	191	91	11	22	14.52	254.00	438.20	7.19	1.44	16	1.49	5.05
杜全林	2	79	5.21	82	168	75.9	113	68	15	22	5.80	71.40	297.40	3.59	0.98	20	0.95	2.32
陈鸿德	2	72	6.61	58	167	75.4	122	74	17	20	7.21	63.80	261.80	7.25	1.24	47	1.72	4.82
蒋祥亮	2	74	7.15	61	166	71.7	205	72	22	17	6.30	75.70	356.00	6.07	1.23	24	1.19	4.06
黄继宪	2	74	5.26	87	172	86.2	141	73	33	31	4.00	86.20	464.20	4.12	2.54	26	0.86	2.70
乔俊华	2	74	5.31	63	172	71.9	139	69	22	27	5.30	75.70	358.90	3.47	1.09	27	1.21	2.04
张治友	2	77	5.09	110	171	63.1	145	80	24	27	4.46	84.80	415.70	6.00	1.57	53	1.23	4.19
王建辉	2	78	4.80	73	175	85.3	144	61	17	21	13.22	156.00	494.40	3.51	0.59	10	1.53	1.86
胡兴华	2	78	6.13	72	164	62.6	149	77	29	28	6.60	68.90	346.70	3.25	0.80	62	1.16	1.99
任大信	2	80	4.45	100	162.5	54.4	155	100	28	29	5.40	64.20	277.10	4.53	0.95	16	1.35	2.81
王茂德	2	78	5.34	64	161	80.1	164	89	20	22	4.40	66.40	459.20	3.22	1.11	15	1.30	1.81
黄金平	2	80	5.27	88	162.5	61.1	150	82	19	24	5.95	83.60	480.10	4.70	1.27	55	1.15	3.13
蒋召林	2	79	7.96	87	166.5	66.6	148	71	48	35	5.60	70.60	363.60	4.54	1.65	28	1.17	2.93
宋井暄	2	80	6.27	109	166.5	70	179	96	65	49	4.59	79.00	398.50	5.92	1.53	50	1.52	3.22
薛仰幸	2	78	5.96	84	170	70	148	80	11	20	3.20	66.60	280.40	4.72	1.04	14	0.94	3.36
魏广林	2	80	5.02	62	160	69.9	163	71	13	24	7.50	127.20	507.00	4.26	1.12	12	1.12	2.88
陈松清	2	83	5.28	85	167	88	197	93	41	43	5.10	89.60	296.60	3.34	1.72	147	1.20	1.90
海俊启	2	79	4.76	72	171	61	143	83	17	20	3.54	54.70	272.80	4.22	2.36	28	1.38	2.56
姜俊峰	2	84	7.04	64	174.5	70.4	138	67	15	19	5.80	75.30	370.40	3.49	0.78	22	1.15	2.09
于坦然	2	86	4.68	59	169	71.5	159	80	24	32	6.21	74.20	355.70	4.56	1.01	24	1.96	2.25
丁化祥	2	87	5.61	98	157.5	63.3	157	90	16	22	5.50	74.80	502.90	7.59	2.13	22	1.57	5.02
赵东波	2	87	4.31	87	158.5	49.5	157	69	49	47	8.34	99.70	377.90	1.86	0.87	29	0.77	0.96
冯立春	2	71	5.47	56	162.5	66.3	133	75	17	24	5.16	66.90	345.30	5.47	0.80	21	1.42	3.71
郭绍忠	2	96	5.11	57	175.5	72.1	110	68	11	22	4.00	73.00	450.30	5.18	0.69	15	1.80	3.27
周继民	2	87	6.48	63	164	78.2	123	70	14	22	16.80	185.90	484.30	4.32	1.35	42	1.46	2.60
来学军	2	68	6.07	84	169	72	143	98	14	17	3.67	89.40	333.90	5.69	2.09	36	1.26	3.78
袁新成	2	64	5.39	65	172	82.5	130	76	67	41	4.90	57.80	359.80	3.82	2.40	27	1.14	1.95
刘栾进	2	63	9.71	89	165.5	73	150	75	16	16	5.45	70.10	350.00	3.50	1.26	18	0.74	2.43
冀锋	2	61	5.03	82	157.5	70.3	145	82	28	29	5.30	59.70	378.50	5.82	1.33	24	1.24	3.93
洪加伟	2	73	6.47	67	164	72.1	134	76	20	24	7.10	49.70	251.80	3.03	0.67	15	1.20	1.66
王兴民	2	62	4.62	73	177	67.3	121	87	23	28	5.46	83.60	323.30	4.36	1.10	21	1.12	2.81
董金民	2	62	5.06	78	168.5	66.9	128	86	26	35	5.20	67.30	382.70	4.63	0.60	49	1.03	3.17
来学全	2	60	5.31	78	169.5	73.8	142	99	27	29	3.12	68.10	451.70	6.00	1.85	52	1.14	4.11
张建魁	2	61	5.92	95	166.5	84.7	145	93	25	21	6.80	72.50	309.60	3.21	0.70	29	1.08	1.84
徐永安	2	60	5.15	74	170.5	66.4	133	84	17	18	4.41	61.60	361.30	5.17	0.86	20	1.27	3.46
张建国	2	60	5.57	79	164	58.6	155	75	28	35	3.50	44.00	311.70	5.47	1.18	36	1.79	2.91
潘克敌	2	68	4.93	69	177	73.8	145	79	21	22	5.81	70.60	437.30	5.23	2.22	19	1.19	3.49
闫景波	2	70	6.15	66	167.5	98.5	166	91	11	15	5.48	69.20	303.30	5.25	1.02	35	1.42	3.26
王子山	2	60	7.42	67	170	72.5	140	88	27	27	7.04	85.30	319.90	4.61	1.16	41	1.10	3.04
张志红	2	61	4.69	88	弃检	弃检	120	78	21	20	8.58	111.70	347.50	5.38	1.26	20	1.50	3.36
董伟亚	2	61	4.67	90	165	49	101	65	10	18	5.30	76.90	313.00	4.95	1.11	17	1.60	3.04
景彬	2	58	4.31	77	174	72.3	124	64	11	17	3.40	66.90	253.60	4.63	0.82	14	1.22	3.00
周黎明	2	64	4.73	75	160.5	58.6	135	85	15	24	4.36	73.40	307.70	5.61	1.40	19	1.26	3.43
王绍兰	1	60	5.85	74	161.5	64.2	116	72	21	25	5.40	72.40	384.40	7.41	2.11	25	1.64	4.89
袁建华	2	68	7.42	83	165	74.9	115	71	19	25	4.67	73.00	308.50	3.57	1.00	33	1.13	2.09
怀玉杰	2	73	6.36	75	164	84.9	151	95	14	27	5.70	64.40	353.20	4.46	0.61	18	1.23	2.89
田金平	2	58	7.04	89	173	84.6	159	104	65	46	5.55	70.40	415.40	4.68	1.02	63	1.58	3.09
宋艳慧	1	37	4.34	85	160.5	79.4	157	106	16	16	4.34	33.40	286.50	4.70	0.92	30	1.35	3.04
王冉冉	1	26	4.61	94	164.5	54.1	112	67	12	17	4.15	56.70	302.10	3.74	0.56	13	1.35	2.26
盖帅	2	25	5.78	77	187	102.7	138	92	63	37	5.40	77.30	418.00	4.95	1.07	28	1.28	3.41
王冬梅	1	59	4.75	78	151.5	54.2	152	87	33	32	5.10	45.20	367.60	6.75	1.41	47	1.67	4.67
王如梅	1	78	8.02	88	155	49.1	175	87	44	34	8.00	46.20	157.30	4.72	0.61	16	2.11	2.54
林紫薇	1	62	4.96	66	161.5	65.5	155	93	16	21	4.10	56.40	234.90	4.65	1.31	21	1.55	2.79
郭楠	1	44	4.60	90	161	57.9	122	77	13	20	3.87	57.40	281.30	4.53	0.79	11	1.56	2.75
董翰宸	2	31	4.64	74	171	78.4	130	86	59	30	6.30	69.50	572.40	6.18	4.57	89	1.11	4.35
魏广友	2	60	7.02	71	177	78.2	122	56	19	21	7.88	65.00	367.00	3.69	0.86	10	1.08	2.26
李德军	2	60	8.32	82	178	91.4	147	92	23	19	7.47	64.40	367.20	4.40	2.15	23	1.16	2.78
王娜	1	30	4.70	106	165	51.9	107	66	13	19	4.20	46.60	263.50	3.83	0.85	14	1.23	2.35
李新宇	1	39	5.63	82	162	64.2	121	77	12	18	5.00	58.40	367.20	5.60	3.08	22	1.36	3.61
邢建林	2	56	4.70	100	174	71.1	149	99	49	48	5.06	59.20	534.40	5.51	2.26	100	1.56	3.42
焦国永	2	64	5.40	74	169.5	82.6	133	75	18	22	7.81	75.90	529.20	4.28	1.91	48	1.23	2.88
刘月侠	1	59	5.37	71	166	91.5	179	104	28	31	4.20	46.80	311.70	5.66	1.96	32	1.27	3.38
王桂玲	1	59	5.29	79	169.5	62.5	128	67	14	21	3.78	57.50	459.10	5.48	4.42	26	1.12	3.41
金传华	2	68	4.71	66	166.5	79.5	126	82	21	22	6.59	82.10	435.10	6.18	1.03	26	1.75	3.97
周新华	2	59	5.17	75	166	69.8	141	90	37	39	4.10	71.30	444.90	4.43	1.06	310	1.80	2.11
杨立新	2	56	5.37	76	177.5	89.4	120	81	25	25	6.28	49.90	384.60	5.94	2.55	32	1.35	3.92
刘磊磊	2	33	5.07	77	193.5	100	127	91	27	40	5.60	71.70	477.30	7.73	5.58	312	1.70	4.23
徐晓娟	1	29	5.31	68	162.5	64.7	120	78	20	24	4.80	53.30	227.70	3.45	1.07	15	0.90	2.05
苏林林	1	26	4.51	84	172	62.6	121	81	17	25	4.50	58.00	376.10	7.09	0.82	13	1.48	4.81
杨调芳	1	26	4.69	86	164.5	81.7	131	84	12	20	3.70	49.20	328.40	5.91	1.80	15	1.34	3.91
李红涛	2	27	5.29	102	178.5	109.8	139	97	123	53	4.99	87.00	533.70	7.76	5.15	119	1.27	5.12
徐胜飞	2	27	5.38	80	176.5	68.1	129	88	12	17	7.39	66.20	413.40	5.67	1.39	23	1.53	3.76
王珂	1	28	4.93	101	162.5	49.7	112	76	11	16	6.50	60.90	306.80	5.20	0.71	14	1.95	3.08
何晴	1	24	5.64	77	163.5	67.2	124	75	18	19	4.07	66.60	362.80	3.96	0.53	14	1.41	2.43
刘子旋	2	26	4.65	76	184	78.4	135	82	18	16	4.80	71.00	321.70	4.34	0.79	20	1.51	2.60
季华锋	2	25	5.03	104	171.5	73.5	143	81	18	20	5.26	82.80	412.60	3.81	0.60	19	1.07	2.46
陈晴歌	1	30	4.64	89	169.5	61.7	104	57	28	26	7.23	53.50	242.20	4.79	0.63	38	1.59	2.95
杨冰倩	1	26	4.36	61	165.5	59.3	128	77	12	18	4.70	50.00	264.00	4.41	0.48	13	1.59	2.60
黄士为	2	27	5.25	96	167.5	79.3	127	80	46	29	3.20	53.00	288.20	6.56	4.19	32	0.95	4.37
袁瑞瑞	1	25	4.34	86	169.5	58.4	112	78	10	16	4.57	51.60	290.80	4.97	0.97	10	1.58	2.94
蒋劲松	2	29	5.84	87	185.5	84	139	93	23	16	4.28	75.60	508.20	5.14	1.91	18	0.90	3.72
李金山	2	27	4.88	82	166.5	72	128	77	17	14	4.70	79.40	338.00	4.60	1.92	29	0.72	3.25
吕小娇	1	27	4.36	83	170	63	122	88	22	24	4.71	49.20	333.90	4.28	0.70	11	1.22	2.66
马竞一	2	27	6.60	88	168.5	75.6	121	78	20	25	5.80	70.80	279.80	5.54	0.79	21	1.15	3.84
顾志鹏	2	28	4.90	90	175.5	88.2	124	76	19	16	7.40	68.40	553.40	7.01	2.29	19	1.07	4.76
李香玉	1	30	5.83	102	弃检	弃检	122	84	18	19	6.50	57.80	304.00	4.38	1.29	33	1.15	2.81
李泉志	2	25	5.56	105	164.5	79.1	138	91	69	36	4.79	62.20	384.40	6.26	2.45	143	1.22	4.26
王守萌	2	28	5.00	69	174	79.6	113	78	40	23	5.50	57.70	424.50	5.02	1.64	27	1.14	3.29
朱蒙蒙	2	25	5.20	98	175	80	146	82	30	15	4.95	80.50	403.10	6.06	1.23	25	1.22	4.15
王小龙	2	27	4.64	67	168	87.9	137	82	60	35	6.46	74.90	666.60	6.03	4.75	52	0.88	4.11
李财富	2	24	5.04	91	175.5	66.4	132	76	18	16	3.30	87.20	373.40	4.93	1.14	18	1.16	3.23
马国政	2	28	4.82	73	182.5	82.6	124	84	60	30	4.90	70.90	389.60	4.99	1.95	137	1.10	3.28
梁森	2	28	4.94	80	173.5	77.7	135	76	23	19	6.40	73.50	378.30	6.28	0.96	17	1.26	4.41
李子涵	1	23	5.18	80	163.5	60	118	74	17	20	3.30	49.80	361.70	5.55	0.72	18	1.12	3.98
王梦茹	1	28	5.14	63	158	56.7	104	66	19	26	4.70	59.40	334.80	5.86	0.56	13	1.83	3.83
陈子勇	2	23	5.07	79	181	83.3	125	79	30	26	4.47	60.70	414.60	3.92	1.11	14	1.04	2.51
何婷婷	1	25	5.29	100	160	53	150	98	17	18	3.00	58.50	205.50	4.28	1.31	19	1.14	2.72
金方晟	2	25	5.39	109	174.5	76.5	126	78	12	16	4.94	90.10	466.60	6.02	0.85	18	1.35	4.07
程春龙	2	23	4.57	71	160.5	61.7	128	65	24	66	2.82	73.60	400.30	4.78	0.80	12	1.46	2.82
蔡宁波	2	25	5.48	90	173.5	73.2	133	78	36	22	3.60	72.60	476.30	5.37	1.56	16	1.16	3.57
孙治强	2	27	5.36	73	177.5	70.9	122	71	16	23	4.70	74.60	303.50	4.43	0.80	16	1.48	2.67
黄怡晴	1	23	4.88	84	160.5	53.6	118	65	21	24	4.40	48.20	321.60	4.33	0.52	39	1.24	2.99
李雪莉	1	23	5.32	91	弃检	弃检	160	93	29	25	5.13	49.60	554.30	6.98	2.07	50	1.03	5.20
陈为英	1	26	3.97	86	174.5	77.5	116	76	13	22	5.93	64.40	793.70	5.24	1.00	18	1.06	3.52
葛冬涛	2	24	4.58	89	173.5	76.6	131	69	25	16	3.49	72.80	490.80	4.87	1.41	16	0.96	3.42
成福坤	2	25	5.26	85	173	71.3	117	77	18	20	4.73	75.60	278.90	4.17	1.07	17	1.23	2.65
庞洋洋	2	23	4.95	93	173	67.7	125	73	20	18	4.50	70.70	359.30	4.44	0.77	16	0.99	3.01
刘淼	2	24	4.66	92	175.5	95.2	155	87	39	31	4.38	80.90	342.30	5.82	1.35	30	1.60	3.83
梁伟明	2	24	4.90	74	182.5	78.6	145	81	14	18	4.46	72.70	449.50	5.55	1.17	17	1.18	3.63
孙月	1	59	4.78	67	163	58.3	127	76	16	23	4.80	59.90	220.60	4.83	1.27	25	1.56	2.84
吴碧霞	1	28	4.98	84	162	59.2	91	63	17	17	4.19	45.50	236.40	3.60	0.79	17	1.42	2.10
宋效英	1	61	5.93	86	154.5	79.2	163	99	27	26	3.80	40.20	296.90	4.52	1.22	24	1.04	3.10
李雯	1	37	4.79	76	157.5	55.8	126	73	15	22	3.50	47.80	221.00	3.50	0.59	13	1.42	1.95
刘志三	2	67	5.00	85	155.5	75.7	151	99	16	23	6.10	78.40	381.50	4.53	0.82	18	1.43	2.89
房克敬	2	67	5.26	88	165	66	149	97	11	25	6.80	106.40	351.50	6.91	1.35	34	1.36	4.48
丁灿	1	35	4.67	74	162	56.3	111	65	21	19	5.00	56.70	293.30	6.21	1.51	17	1.27	4.45
桑化东	2	67	5.13	85	174.5	84.2	142	92	22	22	4.89	65.10	330.10	4.41	4.13	48	0.88	2.91
蔡岳	2	63	5.02	51	179	83.3	113	67	16	21	4.60	70.40	436.10	4.53	1.18	26	1.14	3.04
李琼	2	30	4.98	63	180	84	132	80	59	34	4.77	74.10	347.80	4.12	1.02	22	1.07	2.79
朱文涛	2	35	5.20	81	168	64	121	81	19	18	6.10	65.10	330.30	4.85	0.97	28	1.36	3.25
吴成功	2	33	5.21	72	182	107.5	119	82	39	27	7.20	65.60	368.50	6.87	4.22	71	1.22	4.62
夏文侠	1	59	8.73	62	162	67.4	136	78	21	19	6.40	41.60	256.20	6.54	3.04	21	1.05	4.52
胡秋伟	2	44	5.72	90	178	82	151	99	23	19	4.92	63.40	464.10	5.35	2.59	32	1.00	3.73
胡晓光	2	67	6.63	60	170	74.2	173	99	30	28	6.50	86.20	296.10	4.12	0.77	26	1.20	2.48
杨晓东	2	44	5.99	81	180	87.7	148	99	26	25	5.70	89.50	561.00	5.88	5.13	56	1.21	3.57
杨丹丹	1	59	5.34	63	159.5	74.6	119	74	18	20	4.20	58.70	270.00	5.51	0.79	18	1.20	3.94
杨光保	2	60	5.63	70	170	70.5	142	81	13	18	11.16	83.20	289.00	4.60	0.80	10	1.13	3.05
黄志敏	1	64	5.74	71	164	86.1	141	76	14	17	4.20	49.90	280.40	5.39	2.34	29	1.57	3.27
陈高锋	2	63	7.14	76	164	66	130	79	39	29	6.60	73.40	237.20	4.89	3.22	54	1.31	2.87
孙艳侠	1	45	4.67	65	159	60	102	68	20	31	5.20	49.70	309.20	5.89	1.64	37	1.68	3.69

## Sheet: 基线表
	Variables	HUA (N=325)	Non-HUA(N=1405)	P	Diabetes(N=145)	Non-Diabetes(N=1585)	P
	Women	229（70.5）	959（68.3）	0.44	94（64.8）	1094（69.0）	0.297
	Men	96（29.5）	446（31.7）		51（35.2）	491（31.0）
	UA (umol/L)	429.3(85.2)	276.5(86.2)	<0.001	319.8(115.0)	293.1（114.0）	0.017
	Age (years)	36.0（16.8）	36.0(12.0)	0.298	50.0(26.0)	35.0（11.0）	<0.001
	HR (beats/min)	80.0（16.0）	80.0(14.0)	0.959	81.0(18.0)	80.0（14.0）	0.776
	SBP (mmHg)	131.0（23.0）	121.0(21.0)	<0.001	139.0(24.0)	122.0（21.0）	<0.001
	DBP (mmHg)	81.0（15.0）	75.0(14.0)	<0.001	82.0(15.0)	76.0（15.0）	<0.001
	Weight (Kg)	75.9（15.3）	61.4(14.2)	<0.001	72.1(17.4）	62.8（16.0）	<0.001
	Height (m)	170.5（11.5）	163.0(9.5)	<0.001	164.0(13.5)	164.0（11.0）	0.718
	BMI (kg/m2)	26.3(3.8)	23.2(4.2)	<0.001	26.2（4.0）	23.6（4.5）	<0.001
	FPG (mmol/L)	5.2（0.69）	5.0(0.7)	<0.001	6.8(1.6)	5.0（0.6）	<0.001
	TC (mmol/L)	5.2（1.2）	4.9(1.2)	<0.001	5.1(1.5)	4.9（1.2）	0.267
	TG (mmol/L)	1.6（1.2）	1.0(0.6)	<0.001	1.5(1.2)	1.0（0.8）	<0.001
	HDL (mmol/L)	1.2（0.3）	1.4(0.4)	<0.001	1.2(0.4)	1.4（0.4）	<0.001
	LDL (mmol/L)	3.4（0.9）	3.1(0.9)	<0.001	3.2(1.2)	3.1（0.9）	0.289
	ALT (U/L)	24.0（20.5）	16.0(10.0)	<0.001	23.0（22.0）	17.0（11.0）	<0.001
	AST (U/L)	23.0（9.0）	21.0(7.0)	<0.001	24.0（10.0）	21.0（7.0）	<0.001
	γ-GT(mmol/L)	30.0(31.0)	17.0(12.0)	<0.001	30.0(29.0)	18.0（15.0）	<0.001
	Cr (umol/L)	67.7（15.7）	52.1(14.1)	<0.001	56.7(22.2)	54.2（17.0）	0.592
	BUN (mmol/L)	5.1（1.6）	4.6(1.6)	<0.001	5.5（2.0)	4.6（1.5）	<0.001
	TyG	7.2(0.7)	6.7(0.7)	<0.001	7.5（0.8）	6.7（0.8）	<0.001
	TyG-BMI	188.9(41.3)	155.1(41.2)	<0.001	200.2（45.3）	157.8（44.2）	<0.001

## Sheet: 尿酸roc
HUA	Variables	AUC	Cut-off	Sensitivity (%)	Specificity (%)	Youden index
	TyG	0.728	6.87	0.735	0.626	0.36
	BMI	0.744	25.33	0.656	0.739	0.4
	TyG-BMI	0.756	163.98	0.809	0.622	0.43
Diabetes
	TyG	0.825	7.09	0.793	0.733	0.53
	BMI	0.714	24.84	0.72	0.64	0.36
	TyG-BMI	0.787	175.71	0.77	0.7	0.43
	曲线下方的区域								曲线下方的区域							曲线下方的区域
	检验结果变量: TYG								检验结果变量: BMI							检验结果变量: TYGBMI
	区域	标准 错误a	渐近显著性b	渐近 95% 置信区间					区域	标准 错误a	渐近显著性b	渐近 95% 置信区间				区域	标准 错误a	渐近显著性b	渐近 95% 置信区间
				下限	上限							下限	上限						下限	上限
	0.728	0.015	0	0.698	0.757				0.744	0.014	0	0.716	0.772			0.756	0.015	0	0.727	0.784
	检验结果变量 TYG 至少有一个在正实际状态组与负实际状态组之间的绑定值。统计可能有偏差。								检验结果变量 BMI 至少有一个在正实际状态组与负实际状态组之间的绑定值。统计可能有偏差。							检验结果变量 TYGBMI 至少有一个在正实际状态组与负实际状态组之间的绑定值。统计可能有偏差。
	a 按非参数假定								a 按非参数假定							a 按非参数假定
	b 原假设：真区域 = 0.5								b 原假设：真区域 = 0.5							b 原假设：真区域 = 0.5
	曲线的坐标								曲线的坐标							曲线的坐标
	检验结果变量: TYG								检验结果变量: BMI							检验结果变量:
	TYG	敏感度	1 - 特异性	特异性	约登				BMI	敏感度	1 - 特异性	特异性	约登			TYGBMI	敏感度	1 - 特异性	特异性	约登
	6.865	0.735	0.374	0.626	0.361				25.325	0.656	0.261	0.739	0.395			163.98	0.809	0.378	0.622	0.431
	6.875	0.717	0.368	0.632	0.349				25.335	0.653	0.26	0.74	0.393	0.395		164.01	0.806	0.378	0.622	0.428	0.431
	6.885	0.714	0.364	0.636	0.35				25.345	0.65	0.26	0.74	0.39			164.115	0.803	0.378	0.622	0.425
	6.895	0.711	0.357	0.643	0.354				25.355	0.647	0.26	0.74	0.387			164.245	0.803	0.377	0.623	0.426
	6.905	0.702	0.351	0.649	0.351				25.365	0.647	0.26	0.74	0.387			164.345	0.8	0.377	0.623	0.423
	6.915	0.692	0.34	0.66	0.352				25.375	0.644	0.26	0.74	0.384			164.455	0.8	0.377	0.623	0.423
	6.925	0.683	0.332	0.668	0.351				25.385	0.644	0.257	0.743	0.387			164.535	0.797	0.377	0.623	0.42
	6.935	0.668	0.327	0.673	0.341				25.395	0.644	0.255	0.745	0.389			164.565	0.797	0.376	0.624	0.421
	6.945	0.658	0.322	0.678	0.336				25.405	0.64	0.255	0.745	0.385			164.585	0.794	0.376	0.624	0.418
	6.955	0.655	0.319	0.681	0.336				25.415	0.637	0.254	0.746	0.383			164.62	0.794	0.375	0.625	0.419
	6.965	0.652	0.312	0.688	0.34				25.425	0.634	0.252	0.748	0.382			164.645	0.794	0.374	0.626	0.42
	6.975	0.649	0.302	0.698	0.347				25.435	0.634	0.252	0.748	0.382			164.715	0.794	0.374	0.626	0.42
	6.985	0.646	0.297	0.703	0.349				25.445	0.634	0.25	0.75	0.384			164.8	0.794	0.373	0.627	0.421
	6.995	0.634	0.294	0.706	0.34				25.455	0.625	0.25	0.75	0.375			164.83	0.794	0.372	0.628	0.422
	7.005	0.628	0.288	0.712	0.34				25.465	0.621	0.249	0.751	0.372			164.87	0.794	0.372	0.628	0.422
	7.015	0.625	0.283	0.717	0.342				25.475	0.618	0.248	0.752	0.37			164.92	0.794	0.371	0.629	0.423
	7.025	0.612	0.28	0.72	0.332				25.49	0.615	0.247	0.753	0.368			164.97	0.794	0.37	0.63	0.424
	7.035	0.606	0.278	0.722	0.328				25.505	0.612	0.247	0.753	0.365			165.01	0.794	0.369	0.631	0.425
	7.045	0.597	0.275	0.725	0.322				25.515	0.609	0.245	0.755	0.364			165.095	0.791	0.369	0.631	0.422
	7.055	0.585	0.268	0.732	0.317				25.525	0.603	0.244	0.756	0.359			165.19	0.791	0.369	0.631	0.422
	7.065	0.578	0.26	0.74	0.318				25.54	0.603	0.241	0.759	0.362			165.215	0.788	0.369	0.631	0.419
	7.075	0.569	0.255	0.745	0.314				25.555	0.599	0.238	0.762	0.361			165.295	0.788	0.368	0.632	0.42
	7.085	0.569	0.251	0.749	0.318				25.575	0.599	0.236	0.764	0.363			165.38	0.788	0.367	0.633	0.421
	7.095	0.56	0.244	0.756	0.316				25.595	0.599	0.236	0.764	0.363			165.41	0.788	0.367	0.633	0.421
	7.105	0.554	0.242	0.758	0.312				25.61	0.596	0.235	0.765	0.361			165.48	0.788	0.366	0.634	0.422
	7.115	0.554	0.239	0.761	0.315				25.63	0.593	0.234	0.766	0.359			165.545	0.788	0.365	0.635	0.423
	7.125	0.548	0.232	0.768	0.316				25.645	0.593	0.233	0.767	0.36			165.585	0.788	0.364	0.636	0.424
	7.135	0.529	0.227	0.773	0.302				25.655	0.59	0.233	0.767	0.357			165.64	0.788	0.364	0.636	0.424
	7.145	0.526	0.222	0.778	0.304				25.665	0.59	0.232	0.768	0.358			165.675	0.788	0.363	0.637	0.425
	7.155	0.523	0.219	0.781	0.304				25.675	0.59	0.231	0.769	0.359			165.73	0.785	0.363	0.637	0.422
	7.165	0.523	0.216	0.784	0.307				25.685	0.587	0.23	0.77	0.357			165.81	0.785	0.362	0.638	0.423
	7.175	0.52	0.212	0.788	0.308				25.695	0.584	0.23	0.77	0.354			165.855	0.782	0.362	0.638	0.42
	7.185	0.514	0.209	0.791	0.305				25.705	0.584	0.228	0.772	0.356			165.88	0.782	0.362	0.638	0.42
	7.195	0.505	0.207	0.793	0.298				25.715	0.584	0.225	0.775	0.359			165.91	0.782	0.361	0.639	0.421
	7.205	0.498	0.201	0.799	0.297				25.725	0.58	0.223	0.777	0.357			165.945	0.778	0.361	0.639	0.417
	7.215	0.498	0.198	0.802	0.3				25.735	0.577	0.222	0.778	0.355			165.995	0.778	0.36	0.64	0.418
	7.225	0.486	0.192	0.808	0.294				25.745	0.577	0.221	0.779	0.356			166.12	0.775	0.36	0.64	0.415
	7.235	0.477	0.189	0.811	0.288				25.755	0.577	0.219	0.781	0.358			166.215	0.772	0.36	0.64	0.412
	7.245	0.465	0.179	0.821	0.286				25.765	0.577	0.218	0.782	0.359			166.24	0.772	0.359	0.641	0.413
	7.255	0.465	0.178	0.822	0.287				25.775	0.577	0.217	0.783	0.36			166.275	0.772	0.359	0.641	0.413
	7.265	0.458	0.175	0.825	0.283				25.785	0.577	0.217	0.783	0.36			166.405	0.769	0.358	0.642	0.411
	7.275	0.458	0.17	0.83	0.288				25.795	0.577	0.216	0.784	0.361			166.525	0.769	0.357	0.643	0.412
	7.285	0.452	0.167	0.833	0.285				25.805	0.574	0.215	0.785	0.359			166.535	0.769	0.357	0.643	0.412
	7.295	0.446	0.163	0.837	0.283				25.815	0.571	0.214	0.786	0.357			166.555	0.769	0.356	0.644	0.413
	7.305	0.44	0.161	0.839	0.279				25.83	0.571	0.214	0.786	0.357			166.64	0.766	0.356	0.644	0.41
	7.315	0.434	0.16	0.84	0.274				25.845	0.571	0.213	0.787	0.358			166.72	0.766	0.355	0.645	0.411
	7.325	0.428	0.157	0.843	0.271				25.855	0.565	0.213	0.787	0.352			166.755	0.766	0.354	0.646	0.412
	7.335	0.422	0.152	0.848	0.27				25.87	0.562	0.213	0.787	0.349			166.8	0.766	0.354	0.646	0.412
	7.345	0.418	0.151	0.849	0.267				25.89	0.558	0.212	0.788	0.346			166.865	0.766	0.353	0.647	0.413
	7.355	0.412	0.147	0.853	0.265				25.905	0.552	0.212	0.788	0.34			166.925	0.766	0.352	0.648	0.414
	7.365	0.4	0.142	0.858	0.258				25.92	0.552	0.21	0.79	0.342			167.01	0.766	0.352	0.648	0.414
	7.375	0.388	0.138	0.862	0.25				25.935	0.552	0.209	0.791	0.343			167.115	0.766	0.351	0.649	0.415
	7.385	0.375	0.135	0.865	0.24				25.95	0.552	0.209	0.791	0.343			167.155	0.766	0.35	0.65	0.416
	7.395	0.369	0.13	0.87	0.239				25.965	0.552	0.207	0.793	0.345			167.17	0.766	0.349	0.651	0.417
	7.405	0.366	0.126	0.874	0.24				25.975	0.552	0.206	0.794	0.346			167.195	0.766	0.349	0.651	0.417
	7.415	0.36	0.122	0.878	0.238				25.985	0.549	0.206	0.794	0.343			167.22	0.766	0.348	0.652	0.418
	7.425	0.357	0.121	0.879	0.236				25.995	0.546	0.206	0.794	0.34			167.24	0.763	0.348	0.652	0.415
	7.435	0.351	0.115	0.885	0.236				26.005	0.543	0.204	0.796	0.339			167.255	0.763	0.347	0.653	0.416
	7.445	0.351	0.11	0.89	0.241				26.015	0.543	0.204	0.796	0.339			167.275	0.763	0.347	0.653	0.416
	7.455	0.335	0.108	0.892	0.227				26.03	0.543	0.203	0.797	0.34			167.31	0.763	0.346	0.654	0.417
	7.465	0.329	0.106	0.894	0.223				26.05	0.536	0.201	0.799	0.335			167.335	0.763	0.345	0.655	0.418
	7.475	0.32	0.104	0.896	0.216				26.07	0.533	0.201	0.799	0.332			167.375	0.763	0.344	0.656	0.419
	7.485	0.311	0.101	0.899	0.21				26.09	0.533	0.198	0.802	0.335			167.48	0.763	0.343	0.657	0.42
	7.495	0.302	0.097	0.903	0.205				26.11	0.533	0.197	0.803	0.336			167.58	0.763	0.342	0.658	0.421
	7.505	0.286	0.093	0.907	0.193				26.125	0.533	0.196	0.804	0.337			167.65	0.76	0.342	0.658	0.418
	7.515	0.277	0.088	0.912	0.189				26.14	0.533	0.195	0.805	0.338			167.695	0.76	0.341	0.659	0.419
	7.525	0.274	0.083	0.917	0.191				26.155	0.53	0.195	0.805	0.335			167.735	0.76	0.34	0.66	0.42
	7.535	0.265	0.079	0.921	0.186				26.17	0.53	0.194	0.806	0.336			167.785	0.76	0.34	0.66	0.42
	7.545	0.258	0.076	0.924	0.182				26.185	0.527	0.193	0.807	0.334			167.85	0.76	0.339	0.661	0.421
	7.555	0.255	0.074	0.926	0.181				26.195	0.524	0.193	0.807	0.331			167.91	0.76	0.338	0.662	0.422
	7.565	0.249	0.073	0.927	0.176				26.205	0.524	0.191	0.809	0.333			167.935	0.76	0.337	0.663	0.423
	7.575	0.243	0.07	0.93	0.173				26.215	0.521	0.191	0.809	0.33			168.07	0.757	0.337	0.663	0.42
	7.585	0.24	0.07	0.93	0.17				26.225	0.521	0.19	0.81	0.331			168.21	0.757	0.337	0.663	0.42
	7.595	0.237	0.067	0.933	0.17				26.245	0.517	0.19	0.81	0.327			168.245	0.757	0.335	0.665	0.422
	7.605	0.234	0.065	0.935	0.169				26.265	0.517	0.187	0.813	0.33			168.27	0.757	0.335	0.665	0.422
	7.615	0.231	0.064	0.936	0.167				26.275	0.514	0.187	0.813	0.327			168.3	0.757	0.334	0.666	0.423
	7.625	0.228	0.063	0.937	0.165				26.285	0.514	0.186	0.814	0.328			168.35	0.757	0.333	0.667	0.424
	7.635	0.222	0.06	0.94	0.162				26.295	0.508	0.186	0.814	0.322			168.41	0.757	0.332	0.668	0.425
	7.645	0.218	0.06	0.94	0.158				26.305	0.505	0.186	0.814	0.319			168.465	0.757	0.332	0.668	0.425
	7.655	0.218	0.057	0.943	0.161				26.315	0.505	0.185	0.815	0.32			168.495	0.757	0.331	0.669	0.426
	7.665	0.212	0.056	0.944	0.156				26.33	0.502	0.185	0.815	0.317			168.54	0.757	0.33	0.67	0.427
	7.675	0.209	0.054	0.946	0.155				26.345	0.495	0.185	0.815	0.31			168.62	0.757	0.33	0.67	0.427
	7.685	0.2	0.053	0.947	0.147				26.355	0.495	0.183	0.817	0.312			168.675	0.757	0.329	0.671	0.428
	7.695	0.2	0.053	0.947	0.147				26.365	0.492	0.182	0.818	0.31			168.745	0.754	0.329	0.671	0.425
	7.705	0.194	0.052	0.948	0.142				26.375	0.489	0.182	0.818	0.307			168.865	0.751	0.329	0.671	0.422
	7.715	0.194	0.049	0.951	0.145				26.39	0.486	0.182	0.818	0.304			168.955	0.751	0.328	0.672	0.423
	7.725	0.191	0.049	0.951	0.142				26.405	0.486	0.182	0.818	0.304			168.985	0.748	0.328	0.672	0.42
	7.735	0.185	0.048	0.952	0.137				26.415	0.483	0.182	0.818	0.301			169.015	0.745	0.328	0.672	0.417
	7.745	0.185	0.048	0.952	0.137				26.425	0.483	0.181	0.819	0.302			169.05	0.745	0.327	0.673	0.418
	7.76	0.182	0.047	0.953	0.135				26.435	0.479	0.18	0.82	0.299			169.125	0.745	0.327	0.673	0.418
	7.775	0.182	0.046	0.954	0.136				26.45	0.479	0.178	0.822	0.301			169.2	0.742	0.327	0.673	0.415
	7.785	0.166	0.045	0.955	0.121				26.465	0.479	0.177	0.823	0.302			169.25	0.742	0.326	0.674	0.416
	7.795	0.163	0.045	0.955	0.118				26.475	0.479	0.176	0.824	0.303			169.31	0.742	0.325	0.675	0.417
	7.805	0.16	0.043	0.957	0.117				26.485	0.479	0.174	0.826	0.305			169.355	0.742	0.324	0.676	0.418
	7.815	0.151	0.042	0.958	0.109				26.5	0.479	0.173	0.827	0.306			169.425	0.742	0.323	0.677	0.419
	7.825	0.148	0.041	0.959	0.107				26.515	0.476	0.173	0.827	0.303			169.49	0.742	0.322	0.678	0.42
	7.835	0.148	0.04	0.96	0.108				26.525	0.473	0.173	0.827	0.3			169.525	0.742	0.322	0.678	0.42
	7.845	0.148	0.039	0.961	0.109				26.535	0.473	0.171	0.829	0.302			169.605	0.742	0.321	0.679	0.421
	7.86	0.145	0.038	0.962	0.107				26.545	0.473	0.171	0.829	0.302			169.685	0.738	0.321	0.679	0.417
	7.875	0.138	0.038	0.962	0.1				26.555	0.464	0.17	0.83	0.294			169.705	0.738	0.32	0.68	0.418
	7.885	0.135	0.038	0.962	0.097				26.565	0.461	0.169	0.831	0.292			169.75	0.735	0.32	0.68	0.415
	7.895	0.132	0.036	0.964	0.096				26.585	0.461	0.168	0.832	0.293			169.83	0.735	0.32	0.68	0.415
	7.905	0.129	0.036	0.964	0.093				26.605	0.457	0.166	0.834	0.291			169.875	0.735	0.319	0.681	0.416
	7.915	0.123	0.036	0.964	0.087				26.615	0.454	0.165	0.835	0.289			169.94	0.735	0.318	0.682	0.417
	7.925	0.123	0.034	0.966	0.089				26.625	0.451	0.163	0.837	0.288			170.02	0.735	0.317	0.683	0.418
	7.935	0.114	0.033	0.967	0.081				26.635	0.445	0.161	0.839	0.284			170.055	0.735	0.317	0.683	0.418
	7.95	0.111	0.031	0.969	0.08				26.645	0.445	0.16	0.84	0.285			170.125	0.735	0.316	0.684	0.419
	7.965	0.108	0.031	0.969	0.077				26.655	0.445	0.158	0.842	0.287			170.19	0.735	0.315	0.685	0.42
	7.975	0.105	0.031	0.969	0.074				26.665	0.442	0.155	0.845	0.287			170.23	0.735	0.315	0.685	0.42
	7.985	0.105	0.028	0.972	0.077				26.675	0.438	0.155	0.845	0.283			170.265	0.735	0.314	0.686	0.421
	7.995	0.102	0.028	0.972	0.074				26.685	0.435	0.154	0.846	0.281			170.36	0.735	0.313	0.687	0.422
	8.005	0.098	0.028	0.972	0.07				26.695	0.435	0.153	0.847	0.282			170.475	0.735	0.312	0.688	0.423
	8.015	0.095	0.026	0.974	0.069				26.705	0.435	0.151	0.849	0.284			170.54	0.732	0.312	0.688	0.42
	8.025	0.092	0.025	0.975	0.067				26.715	0.429	0.15	0.85	0.279			170.585	0.729	0.312	0.688	0.417
	8.045	0.089	0.025	0.975	0.064				26.725	0.423	0.15	0.85	0.273			170.625	0.729	0.312	0.688	0.417
	8.065	0.083	0.025	0.975	0.058				26.735	0.416	0.15	0.85	0.266			170.67	0.729	0.311	0.689	0.418
	8.08	0.083	0.024	0.976	0.059				26.755	0.416	0.15	0.85	0.266			170.685	0.726	0.31	0.69	0.416
	8.095	0.08	0.024	0.976	0.056				26.775	0.416	0.149	0.851	0.267			170.72	0.726	0.31	0.69	0.416
	8.115	0.08	0.023	0.977	0.057				26.785	0.416	0.148	0.852	0.268			170.795	0.723	0.309	0.691	0.414
	8.135	0.077	0.023	0.977	0.054				26.795	0.416	0.147	0.853	0.269			170.875	0.723	0.308	0.692	0.415
	8.145	0.074	0.022	0.978	0.052				26.805	0.416	0.146	0.854	0.27			171.07	0.723	0.307	0.693	0.416
	8.155	0.074	0.021	0.979	0.053				26.815	0.413	0.145	0.855	0.268			171.295	0.723	0.307	0.693	0.416
	8.165	0.071	0.02	0.98	0.051				26.83	0.41	0.145	0.855	0.265			171.405	0.723	0.306	0.694	0.417
	8.175	0.065	0.02	0.98	0.045				26.845	0.404	0.145	0.855	0.259			171.455	0.723	0.305	0.695	0.418
	8.19	0.062	0.019	0.981	0.043				26.87	0.404	0.143	0.857	0.261			171.465	0.723	0.304	0.696	0.419
	8.21	0.058	0.018	0.982	0.04				26.895	0.404	0.142	0.858	0.262			171.48	0.723	0.303	0.697	0.42
	8.225	0.058	0.017	0.983	0.041				26.915	0.404	0.142	0.858	0.262			171.505	0.72	0.303	0.697	0.417
	8.235	0.058	0.016	0.984	0.042				26.945	0.401	0.141	0.859	0.26			171.545	0.72	0.302	0.698	0.418
	8.245	0.055	0.016	0.984	0.039				26.97	0.401	0.14	0.86	0.261			171.61	0.72	0.302	0.698	0.418
	8.26	0.052	0.016	0.984	0.036				26.985	0.401	0.139	0.861	0.262			171.695	0.72	0.301	0.699	0.419
	8.285	0.049	0.016	0.984	0.033				26.995	0.394	0.138	0.862	0.256			171.745	0.72	0.3	0.7	0.42
	8.305	0.049	0.015	0.985	0.034				27.01	0.394	0.136	0.864	0.258			171.78	0.72	0.3	0.7	0.42
	8.32	0.049	0.014	0.986	0.035				27.025	0.391	0.136	0.864	0.255			171.825	0.72	0.299	0.701	0.421
	8.335	0.049	0.014	0.986	0.035				27.035	0.391	0.136	0.864	0.255			171.85	0.72	0.298	0.702	0.422
	8.345	0.046	0.014	0.986	0.032				27.05	0.391	0.135	0.865	0.256			171.905	0.717	0.298	0.702	0.419
	8.355	0.043	0.014	0.986	0.029				27.065	0.391	0.134	0.866	0.257			171.955	0.714	0.298	0.702	0.416
	8.365	0.04	0.012	0.988	0.028				27.075	0.388	0.134	0.866	0.254			172.08	0.711	0.298	0.702	0.413
	8.38	0.04	0.011	0.989	0.029				27.09	0.388	0.133	0.867	0.255			172.21	0.711	0.298	0.702	0.413
	8.395	0.037	0.011	0.989	0.026				27.105	0.385	0.133	0.867	0.252			172.25	0.711	0.297	0.703	0.414
	8.405	0.037	0.01	0.99	0.027				27.12	0.382	0.132	0.868	0.25			172.29	0.711	0.296	0.704	0.415
	8.415	0.037	0.009	0.991	0.028				27.155	0.382	0.131	0.869	0.251			172.31	0.711	0.295	0.705	0.416
	8.425	0.037	0.008	0.992	0.029				27.205	0.379	0.131	0.869	0.248			172.385	0.708	0.295	0.705	0.413
	8.435	0.034	0.007	0.993	0.027				27.235	0.379	0.131	0.869	0.248			172.49	0.708	0.295	0.705	0.413
	8.465	0.031	0.007	0.993	0.024				27.245	0.375	0.131	0.869	0.244			172.585	0.708	0.294	0.706	0.414
	8.495	0.028	0.006	0.994	0.022				27.255	0.369	0.13	0.87	0.239			172.665	0.708	0.293	0.707	0.415
	8.505	0.028	0.006	0.994	0.022				27.275	0.369	0.129	0.871	0.24			172.755	0.708	0.293	0.707	0.415
	8.52	0.025	0.005	0.995	0.02				27.295	0.366	0.129	0.871	0.237			172.905	0.705	0.293	0.707	0.412
	8.545	0.022	0.005	0.995	0.017				27.305	0.36	0.128	0.872	0.232			173.06	0.705	0.292	0.708	0.413
	8.565	0.018	0.005	0.995	0.013				27.315	0.36	0.128	0.872	0.232			173.175	0.705	0.291	0.709	0.414
	8.62	0.015	0.004	0.996	0.011				27.325	0.356	0.127	0.873	0.229			173.25	0.702	0.29	0.71	0.412
	8.69	0.015	0.004	0.996	0.011				27.335	0.353	0.126	0.874	0.227			173.295	0.702	0.289	0.711	0.413
	8.725	0.015	0.003	0.997	0.012				27.345	0.35	0.124	0.876	0.226			173.325	0.702	0.288	0.712	0.414
	8.83	0.015	0.002	0.998	0.013				27.355	0.347	0.124	0.876	0.223			173.345	0.698	0.288	0.712	0.41
	8.975	0.015	0.001	0.999	0.014				27.37	0.347	0.122	0.878	0.225			173.37	0.698	0.288	0.712	0.41
	9.135	0.012	0.001	0.999	0.011				27.39	0.347	0.121	0.879	0.226			173.405	0.695	0.288	0.712	0.407
	9.285	0.009	0.001	0.999	0.008				27.41	0.347	0.12	0.88	0.227			173.495	0.695	0.286	0.714	0.409
	9.34	0.006	0.001	0.999	0.005				27.425	0.344	0.12	0.88	0.224			173.59	0.692	0.285	0.715	0.407
	9.405	0.006	0.001	0.999	0.005				27.435	0.344	0.118	0.882	0.226			173.665	0.689	0.285	0.715	0.404
	9.545	0.006	0	1	0.006				27.445	0.341	0.118	0.882	0.223			173.765	0.689	0.284	0.716	0.405
	9.75	0.003	0	1	0.003				27.46	0.341	0.117	0.883	0.224			173.845	0.689	0.283	0.717	0.406
	10.87	0	0	1	0				27.49	0.338	0.117	0.883	0.221			173.89	0.686	0.283	0.717	0.403
	检验结果变量 TYG 至少有一个在正实际状态组与负实际状态组之间的绑定值。								27.52	0.338	0.117	0.883	0.221			173.92	0.686	0.282	0.718	0.404
	a 最小分界值为最小实测检验值减 1，最大分界值为最大实测检验值加 1。所有其他分界值均为两个连续的有序实测检验值的平均值。								27.54	0.331	0.116	0.884	0.215			173.945	0.686	0.281	0.719	0.405
									27.56	0.328	0.114	0.886	0.214			174.005	0.686	0.28	0.72	0.406
									27.575	0.328	0.113	0.887	0.215			174.14	0.686	0.28	0.72	0.406
									27.585	0.325	0.113	0.887	0.212			174.275	0.686	0.279	0.721	0.407
									27.595	0.322	0.112	0.888	0.21			174.4	0.686	0.278	0.722	0.408
									27.61	0.319	0.112	0.888	0.207			174.505	0.686	0.277	0.723	0.409
									27.63	0.315	0.112	0.888	0.203			174.6	0.686	0.276	0.724	0.41
									27.645	0.312	0.111	0.889	0.201			174.68	0.686	0.275	0.725	0.411
									27.655	0.312	0.109	0.891	0.203			174.71	0.686	0.275	0.725	0.411
									27.665	0.303	0.109	0.891	0.194			174.73	0.686	0.274	0.726	0.412
									27.675	0.303	0.108	0.892	0.195			174.765	0.686	0.273	0.727	0.413
									27.7	0.303	0.106	0.894	0.197			174.82	0.686	0.273	0.727	0.413
									27.725	0.3	0.106	0.894	0.194			174.865	0.686	0.272	0.728	0.414
									27.735	0.297	0.106	0.894	0.191			174.89	0.683	0.272	0.728	0.411
									27.745	0.293	0.106	0.894	0.187			174.92	0.68	0.272	0.728	0.408
									27.765	0.293	0.105	0.895	0.188			174.995	0.677	0.272	0.728	0.405
									27.785	0.29	0.105	0.895	0.185			175.06	0.677	0.271	0.729	0.406
									27.8	0.29	0.104	0.896	0.186			175.1	0.677	0.27	0.73	0.407
									27.815	0.29	0.103	0.897	0.187			175.17	0.677	0.27	0.73	0.407
									27.825	0.29	0.102	0.898	0.188			175.225	0.677	0.269	0.731	0.408
									27.84	0.29	0.101	0.899	0.189			175.27	0.677	0.268	0.732	0.409
									27.86	0.287	0.101	0.899	0.186			175.33	0.677	0.268	0.732	0.409
									27.88	0.287	0.099	0.901	0.188			175.415	0.677	0.267	0.733	0.41
									27.895	0.287	0.098	0.902	0.189			175.485	0.674	0.267	0.733	0.407
									27.905	0.287	0.098	0.902	0.189			175.51	0.674	0.266	0.734	0.408
									27.915	0.284	0.098	0.902	0.186			175.605	0.671	0.266	0.734	0.405
									27.93	0.281	0.098	0.902	0.183			175.705	0.671	0.265	0.735	0.406
									27.95	0.278	0.098	0.902	0.18			175.75	0.671	0.265	0.735	0.406
									27.965	0.278	0.097	0.903	0.181			175.79	0.671	0.264	0.736	0.407
									27.975	0.274	0.096	0.904	0.178			175.805	0.671	0.263	0.737	0.408
									27.985	0.274	0.095	0.905	0.179			175.83	0.671	0.263	0.737	0.408
									27.995	0.271	0.095	0.905	0.176			175.86	0.671	0.262	0.738	0.409
									28.02	0.268	0.095	0.905	0.173			175.895	0.671	0.261	0.739	0.41
									28.045	0.268	0.094	0.906	0.174			175.93	0.668	0.261	0.739	0.407
									28.065	0.265	0.093	0.907	0.172			176.015	0.668	0.26	0.74	0.408
									28.1	0.262	0.093	0.907	0.169			176.12	0.668	0.26	0.74	0.408
									28.125	0.262	0.092	0.908	0.17			176.16	0.665	0.259	0.741	0.406
									28.135	0.262	0.091	0.909	0.171			176.185	0.662	0.259	0.741	0.403
									28.145	0.259	0.091	0.909	0.168			176.22	0.658	0.259	0.741	0.399
									28.155	0.256	0.091	0.909	0.165			176.25	0.655	0.259	0.741	0.396
									28.165	0.252	0.09	0.91	0.162			176.27	0.655	0.258	0.742	0.397
									28.175	0.249	0.09	0.91	0.159			176.29	0.655	0.258	0.742	0.397
									28.185	0.249	0.09	0.91	0.159			176.325	0.655	0.257	0.743	0.398
									28.195	0.246	0.09	0.91	0.156			176.37	0.652	0.256	0.744	0.396
									28.21	0.243	0.088	0.912	0.155			176.395	0.652	0.256	0.744	0.396
									28.225	0.243	0.088	0.912	0.155			176.415	0.652	0.255	0.745	0.397
									28.235	0.24	0.088	0.912	0.152			176.44	0.652	0.254	0.746	0.398
									28.245	0.237	0.087	0.913	0.15			176.485	0.652	0.253	0.747	0.399
									28.255	0.233	0.087	0.913	0.146			176.63	0.652	0.253	0.747	0.399
									28.265	0.233	0.086	0.914	0.147			176.845	0.649	0.253	0.747	0.396
									28.275	0.23	0.086	0.914	0.144			177.005	0.646	0.253	0.747	0.393
									28.29	0.227	0.085	0.915	0.142			177.085	0.643	0.253	0.747	0.39
									28.31	0.227	0.084	0.916	0.143			177.115	0.643	0.252	0.748	0.391
									28.33	0.227	0.081	0.919	0.146			177.165	0.643	0.251	0.749	0.392
									28.36	0.227	0.079	0.921	0.148			177.255	0.643	0.251	0.749	0.392
									28.385	0.224	0.078	0.922	0.146			177.305	0.643	0.25	0.75	0.393
									28.395	0.221	0.078	0.922	0.143			177.445	0.643	0.249	0.751	0.394
									28.43	0.221	0.077	0.923	0.144			177.595	0.643	0.248	0.752	0.395
									28.465	0.218	0.077	0.923	0.141			177.63	0.643	0.248	0.752	0.395
									28.485	0.215	0.077	0.923	0.138			177.68	0.64	0.248	0.752	0.392
									28.505	0.211	0.077	0.923	0.134			177.875	0.64	0.247	0.753	0.393
									28.515	0.211	0.077	0.923	0.134			178.08	0.64	0.246	0.754	0.394
									28.53	0.205	0.077	0.923	0.128			178.15	0.637	0.246	0.754	0.391
									28.555	0.205	0.075	0.925	0.13			178.215	0.637	0.246	0.754	0.391
									28.575	0.202	0.075	0.925	0.127			178.285	0.634	0.246	0.754	0.388
									28.605	0.199	0.075	0.925	0.124			178.34	0.634	0.245	0.755	0.389
									28.635	0.199	0.074	0.926	0.125			178.38	0.634	0.244	0.756	0.39
									28.645	0.196	0.074	0.926	0.122			178.445	0.634	0.243	0.757	0.391
									28.665	0.196	0.073	0.927	0.123			178.51	0.631	0.243	0.757	0.388
									28.69	0.192	0.072	0.928	0.12			178.565	0.628	0.243	0.757	0.385
									28.715	0.189	0.071	0.929	0.118			178.62	0.628	0.243	0.757	0.385
									28.735	0.189	0.071	0.929	0.118			178.69	0.625	0.243	0.757	0.382
									28.745	0.189	0.069	0.931	0.12			178.755	0.625	0.242	0.758	0.383
									28.76	0.186	0.069	0.931	0.117			178.8	0.625	0.241	0.759	0.384
									28.795	0.183	0.069	0.931	0.114			178.85	0.625	0.24	0.76	0.385
									28.835	0.183	0.069	0.931	0.114			178.9	0.622	0.24	0.76	0.382
									28.87	0.18	0.069	0.931	0.111			178.945	0.618	0.24	0.76	0.378
									28.895	0.18	0.068	0.932	0.112			178.965	0.618	0.239	0.761	0.379
									28.915	0.18	0.067	0.933	0.113			179.03	0.618	0.238	0.762	0.38
									28.94	0.174	0.066	0.934	0.108			179.12	0.615	0.238	0.762	0.377
									28.955	0.17	0.065	0.935	0.105			179.18	0.615	0.238	0.762	0.377
									28.97	0.167	0.065	0.935	0.102			179.215	0.612	0.238	0.762	0.374
									28.99	0.167	0.064	0.936	0.103			179.26	0.612	0.237	0.763	0.375
									29.015	0.167	0.063	0.937	0.104			179.33	0.609	0.237	0.763	0.372
									29.04	0.167	0.063	0.937	0.104			179.375	0.609	0.236	0.764	0.373
									29.06	0.161	0.063	0.937	0.098			179.425	0.606	0.236	0.764	0.37
									29.08	0.155	0.063	0.937	0.092			179.48	0.606	0.236	0.764	0.37
									29.095	0.155	0.062	0.938	0.093			179.545	0.606	0.235	0.765	0.371
									29.12	0.155	0.061	0.939	0.094			179.625	0.603	0.235	0.765	0.368
									29.15	0.148	0.06	0.94	0.088			179.695	0.603	0.234	0.766	0.369
									29.175	0.148	0.059	0.941	0.089			179.735	0.6	0.234	0.766	0.366
									29.195	0.145	0.059	0.941	0.086			179.775	0.6	0.233	0.767	0.367
									29.21	0.145	0.058	0.942	0.087			179.905	0.6	0.233	0.767	0.367
									29.225	0.142	0.058	0.942	0.084			180.03	0.6	0.232	0.768	0.368
									29.255	0.142	0.057	0.943	0.085			180.21	0.6	0.231	0.769	0.369
									29.3	0.139	0.057	0.943	0.082			180.395	0.6	0.229	0.771	0.371
									29.34	0.139	0.056	0.944	0.083			180.445	0.597	0.229	0.771	0.368
									29.365	0.136	0.055	0.945	0.081			180.555	0.597	0.228	0.772	0.369
									29.375	0.132	0.055	0.945	0.077			180.695	0.597	0.228	0.772	0.369
									29.385	0.129	0.055	0.945	0.074			180.855	0.594	0.228	0.772	0.366
									29.395	0.129	0.055	0.945	0.074			180.975	0.591	0.228	0.772	0.363
									29.405	0.129	0.054	0.946	0.075			181	0.591	0.227	0.773	0.364
									29.425	0.129	0.053	0.947	0.076			181.1	0.591	0.226	0.774	0.365
									29.455	0.126	0.053	0.947	0.073			181.245	0.588	0.226	0.774	0.362
									29.51	0.123	0.053	0.947	0.07			181.335	0.588	0.226	0.774	0.362
									29.565	0.123	0.053	0.947	0.07			181.375	0.588	0.225	0.775	0.363
									29.585	0.123	0.052	0.948	0.071			181.525	0.588	0.224	0.776	0.364
									29.6	0.12	0.052	0.948	0.068			181.67	0.588	0.223	0.777	0.365
									29.615	0.12	0.051	0.949	0.069			181.7	0.585	0.223	0.777	0.362
									29.63	0.117	0.05	0.95	0.067			181.73	0.585	0.223	0.777	0.362
									29.655	0.117	0.049	0.951	0.068			181.755	0.582	0.223	0.777	0.359
									29.7	0.117	0.048	0.952	0.069			181.815	0.578	0.223	0.777	0.355
									29.735	0.117	0.047	0.953	0.07			182.005	0.578	0.222	0.778	0.356
									29.765	0.117	0.046	0.954	0.071			182.18	0.575	0.222	0.778	0.353
									29.81	0.114	0.045	0.955	0.069			182.235	0.575	0.221	0.779	0.354
									29.835	0.114	0.044	0.956	0.07			182.295	0.575	0.221	0.779	0.354
									29.85	0.11	0.044	0.956	0.066			182.355	0.575	0.22	0.78	0.355
									29.87	0.107	0.044	0.956	0.063			182.43	0.575	0.219	0.781	0.356
									29.895	0.107	0.044	0.956	0.063			182.5	0.575	0.219	0.781	0.356
									29.925	0.107	0.043	0.957	0.064			182.565	0.575	0.218	0.782	0.357
									29.955	0.104	0.042	0.958	0.062			182.645	0.575	0.217	0.783	0.358
									29.975	0.101	0.042	0.958	0.059			182.685	0.575	0.216	0.784	0.359
									30.005	0.101	0.042	0.958	0.059			182.71	0.575	0.214	0.786	0.361
									30.04	0.098	0.042	0.958	0.056			182.735	0.575	0.214	0.786	0.361
									30.075	0.095	0.042	0.958	0.053			182.745	0.575	0.213	0.787	0.362
									30.11	0.088	0.042	0.958	0.046			182.765	0.575	0.212	0.788	0.363
									30.14	0.088	0.041	0.959	0.047			182.82	0.575	0.211	0.789	0.364
									30.175	0.088	0.039	0.961	0.049			182.925	0.575	0.21	0.79	0.365
									30.2	0.088	0.039	0.961	0.049			183.025	0.575	0.209	0.791	0.366
									30.225	0.085	0.039	0.961	0.046			183.1	0.572	0.209	0.791	0.363
									30.255	0.082	0.039	0.961	0.043			183.155	0.569	0.209	0.791	0.36
									30.28	0.082	0.038	0.962	0.044			183.235	0.569	0.208	0.792	0.361
									30.31	0.082	0.037	0.963	0.045			183.39	0.569	0.207	0.793	0.362
									30.35	0.082	0.036	0.964	0.046			183.53	0.569	0.206	0.794	0.363
									30.39	0.082	0.036	0.964	0.046			183.615	0.569	0.206	0.794	0.363
									30.425	0.082	0.035	0.965	0.047			183.675	0.569	0.205	0.795	0.364
									30.465	0.079	0.035	0.965	0.044			183.73	0.566	0.205	0.795	0.361
									30.505	0.079	0.034	0.966	0.045			183.795	0.566	0.204	0.796	0.362
									30.535	0.079	0.034	0.966	0.045			183.835	0.563	0.204	0.796	0.359
									30.565	0.079	0.033	0.967	0.046			183.865	0.563	0.204	0.796	0.359
									30.64	0.079	0.032	0.968	0.047			183.93	0.56	0.204	0.796	0.356
									30.705	0.076	0.032	0.968	0.044			184.015	0.557	0.204	0.796	0.353
									30.735	0.076	0.031	0.969	0.045			184.12	0.557	0.203	0.797	0.354
									30.765	0.076	0.031	0.969	0.045			184.23	0.557	0.202	0.798	0.355
									30.795	0.073	0.031	0.969	0.042			184.31	0.554	0.201	0.799	0.353
									30.86	0.073	0.028	0.972	0.045			184.425	0.551	0.201	0.799	0.35
									30.905	0.069	0.028	0.972	0.041			184.515	0.551	0.2	0.8	0.351
									30.925	0.069	0.028	0.972	0.041			184.54	0.548	0.2	0.8	0.348
									30.985	0.069	0.027	0.973	0.042			184.59	0.548	0.199	0.801	0.349
									31.035	0.066	0.027	0.973	0.039			184.635	0.548	0.199	0.801	0.349
									31.08	0.066	0.026	0.974	0.04			184.665	0.548	0.198	0.802	0.35
									31.13	0.063	0.026	0.974	0.037			184.69	0.545	0.198	0.802	0.347
									31.175	0.06	0.026	0.974	0.034			184.73	0.545	0.197	0.803	0.348
									31.225	0.06	0.025	0.975	0.035			184.77	0.545	0.196	0.804	0.349
									31.265	0.057	0.025	0.975	0.032			184.845	0.542	0.196	0.804	0.346
									31.3	0.057	0.024	0.976	0.033			184.995	0.538	0.196	0.804	0.342
									31.365	0.054	0.024	0.976	0.03			185.285	0.535	0.196	0.804	0.339
									31.425	0.05	0.024	0.976	0.026			185.52	0.532	0.196	0.804	0.336
									31.49	0.05	0.023	0.977	0.027			185.575	0.532	0.196	0.804	0.336
									31.56	0.05	0.022	0.978	0.028			185.61	0.532	0.195	0.805	0.337
									31.68	0.05	0.021	0.979	0.029			185.63	0.532	0.194	0.806	0.338
									31.795	0.047	0.021	0.979	0.026			185.715	0.532	0.194	0.806	0.338
									31.84	0.044	0.021	0.979	0.023			185.805	0.532	0.193	0.807	0.339
									31.905	0.044	0.02	0.98	0.024			185.84	0.532	0.192	0.808	0.34
									31.935	0.044	0.019	0.981	0.025			185.87	0.532	0.191	0.809	0.341
									31.975	0.044	0.018	0.982	0.026			185.955	0.532	0.191	0.809	0.341
									32.03	0.041	0.017	0.983	0.024			186.08	0.529	0.191	0.809	0.338
									32.065	0.041	0.016	0.984	0.025			186.195	0.526	0.191	0.809	0.335
									32.1	0.041	0.015	0.985	0.026			186.295	0.523	0.191	0.809	0.332
									32.185	0.038	0.015	0.985	0.023			186.36	0.523	0.19	0.81	0.333
									32.31	0.038	0.015	0.985	0.023			186.405	0.523	0.189	0.811	0.334
									32.41	0.035	0.015	0.985	0.02			186.435	0.523	0.189	0.811	0.334
									32.455	0.035	0.014	0.986	0.021			186.495	0.523	0.188	0.812	0.335
									32.525	0.032	0.014	0.986	0.018			186.6	0.523	0.187	0.813	0.336
									32.61	0.032	0.013	0.987	0.019			186.745	0.523	0.186	0.814	0.337
									32.745	0.028	0.013	0.987	0.015			186.855	0.523	0.186	0.814	0.337
									32.865	0.025	0.013	0.987	0.012			186.91	0.523	0.184	0.816	0.339
									32.9	0.022	0.013	0.987	0.009			186.96	0.523	0.184	0.816	0.339
									32.95	0.019	0.012	0.988	0.007			187.015	0.52	0.183	0.817	0.337
									32.985	0.016	0.012	0.988	0.004			187.14	0.52	0.182	0.818	0.338
									33.035	0.016	0.012	0.988	0.004			187.24	0.52	0.181	0.819	0.339
									33.125	0.016	0.011	0.989	0.005			187.3	0.517	0.181	0.819	0.336
									33.195	0.016	0.01	0.99	0.006			187.37	0.514	0.181	0.819	0.333
									33.275	0.016	0.009	0.991	0.007			187.405	0.514	0.181	0.819	0.333
									33.725	0.016	0.009	0.991	0.007			187.455	0.514	0.179	0.821	0.335
									34.285	0.016	0.008	0.992	0.008			187.51	0.514	0.179	0.821	0.335
									34.495	0.013	0.008	0.992	0.005			187.55	0.514	0.178	0.822	0.336
									34.575	0.013	0.007	0.993	0.006			187.605	0.511	0.178	0.822	0.333
									34.695	0.009	0.007	0.993	0.002			187.65	0.511	0.177	0.823	0.334
									34.935	0.006	0.007	0.993	-0.001			187.67	0.511	0.177	0.823	0.334
									35.105	0.003	0.007	0.993	-0.004			187.69	0.511	0.176	0.824	0.335
									35.25	0.003	0.007	0.993	-0.004			187.73	0.511	0.175	0.825	0.336
									35.395	0.003	0.006	0.994	-0.003			187.89	0.508	0.175	0.825	0.333
									35.51	0.003	0.005	0.995	-0.002			188.115	0.508	0.174	0.826	0.334
									35.94	0.003	0.004	0.996	-0.001			188.22	0.508	0.174	0.826	0.334
									36.495	0.003	0.004	0.996	-0.001			188.295	0.505	0.174	0.826	0.331
									36.75	0	0.004	0.996	-0.004			188.46	0.505	0.173	0.827	0.332
									36.88	0	0.003	0.997	-0.003			188.57	0.502	0.173	0.827	0.329
									37.175	0	0.002	0.998	-0.002			188.59	0.502	0.172	0.828	0.33
									38.09	0	0.001	0.999	-0.001			188.66	0.502	0.171	0.829	0.331
									39.795	0	0.001	0.999	-0.001			188.755	0.502	0.17	0.83	0.332
									41.77	0	0	1	0			188.86	0.502	0.169	0.831	0.333
									检验结果变量 BMI 至少有一个在正实际状态组与负实际状态组之间的绑定值。							188.935	0.498	0.169	0.831	0.329
									a 最小分界值为最小实测检验值减 1，最大分界值为最大实测检验值加 1。所有其他分界值均为两个连续的有序实测检验值的平均值。							188.945	0.495	0.169	0.831	0.326
																189	0.492	0.169	0.831	0.323
																189.06	0.492	0.167	0.833	0.325
																189.08	0.489	0.167	0.833	0.322
																189.145	0.486	0.167	0.833	0.319
																189.21	0.486	0.167	0.833	0.319
																189.225	0.486	0.166	0.834	0.32
																189.24	0.486	0.165	0.835	0.321
																189.255	0.486	0.164	0.836	0.322
																189.305	0.486	0.164	0.836	0.322
																189.365	0.483	0.164	0.836	0.319
																189.39	0.48	0.164	0.836	0.316
																189.485	0.477	0.164	0.836	0.313
																189.59	0.477	0.163	0.837	0.314
																189.635	0.474	0.163	0.837	0.311
																189.685	0.474	0.162	0.838	0.312
																189.725	0.474	0.162	0.838	0.312
																189.76	0.474	0.161	0.839	0.313
																189.85	0.474	0.16	0.84	0.314
																189.925	0.474	0.159	0.841	0.315
																189.98	0.474	0.158	0.842	0.316
																190.035	0.474	0.157	0.843	0.317
																190.085	0.474	0.157	0.843	0.317
																190.15	0.471	0.157	0.843	0.314
																190.2	0.471	0.156	0.844	0.315
																190.255	0.471	0.155	0.845	0.316
																190.285	0.471	0.154	0.846	0.317
																190.335	0.468	0.154	0.846	0.314
																190.435	0.465	0.154	0.846	0.311
																190.51	0.465	0.153	0.847	0.312
																190.54	0.465	0.152	0.848	0.313
																190.555	0.465	0.152	0.848	0.313
																190.61	0.465	0.151	0.849	0.314
																190.705	0.465	0.15	0.85	0.315
																190.82	0.462	0.15	0.85	0.312
																190.925	0.455	0.15	0.85	0.305
																191.015	0.455	0.149	0.851	0.306
																191.14	0.452	0.149	0.851	0.303
																191.265	0.449	0.149	0.851	0.3
																191.335	0.449	0.148	0.852	0.301
																191.36	0.449	0.147	0.853	0.302
																191.395	0.449	0.147	0.853	0.302
																191.49	0.449	0.146	0.854	0.303
																191.68	0.449	0.145	0.855	0.304
																191.98	0.449	0.144	0.856	0.305
																192.23	0.446	0.144	0.856	0.302
																192.31	0.446	0.144	0.856	0.302
																192.33	0.446	0.143	0.857	0.303
																192.365	0.446	0.142	0.858	0.304
																192.415	0.446	0.142	0.858	0.304
																192.465	0.446	0.141	0.859	0.305
																192.52	0.446	0.14	0.86	0.306
																192.59	0.446	0.14	0.86	0.306
																192.645	0.443	0.139	0.861	0.304
																192.89	0.443	0.138	0.862	0.305
																193.13	0.443	0.137	0.863	0.306
																193.24	0.44	0.137	0.863	0.303
																193.415	0.44	0.137	0.863	0.303
																193.52	0.44	0.136	0.864	0.304
																193.58	0.44	0.135	0.865	0.305
																193.695	0.44	0.135	0.865	0.305
																193.8	0.44	0.134	0.866	0.306
																193.89	0.44	0.133	0.867	0.307
																194.08	0.44	0.132	0.868	0.308
																194.205	0.44	0.131	0.869	0.309
																194.22	0.44	0.13	0.87	0.31
																194.3	0.44	0.13	0.87	0.31
																194.385	0.44	0.129	0.871	0.311
																194.405	0.44	0.128	0.872	0.312
																194.43	0.437	0.128	0.872	0.309
																194.48	0.437	0.127	0.873	0.31
																194.52	0.434	0.127	0.873	0.307
																194.585	0.431	0.127	0.873	0.304
																194.79	0.428	0.127	0.873	0.301
																194.96	0.425	0.127	0.873	0.298
																195.01	0.422	0.127	0.873	0.295
																195.065	0.422	0.127	0.873	0.295
																195.135	0.422	0.125	0.875	0.297
																195.325	0.422	0.125	0.875	0.297
																195.525	0.422	0.124	0.876	0.298
																195.59	0.418	0.124	0.876	0.294
																195.64	0.415	0.124	0.876	0.291
																195.73	0.412	0.124	0.876	0.288
																195.88	0.412	0.123	0.877	0.289
																196.065	0.409	0.123	0.877	0.286
																196.2	0.409	0.122	0.878	0.287
																196.26	0.406	0.122	0.878	0.284
																196.3	0.406	0.122	0.878	0.284
																196.4	0.403	0.122	0.878	0.281
																196.54	0.4	0.122	0.878	0.278
																196.685	0.397	0.122	0.878	0.275
																196.91	0.394	0.122	0.878	0.272
																197.12	0.394	0.12	0.88	0.274
																197.225	0.391	0.12	0.88	0.271
																197.315	0.391	0.12	0.88	0.271
																197.375	0.388	0.12	0.88	0.268
																197.44	0.388	0.119	0.881	0.269
																197.535	0.385	0.119	0.881	0.266
																197.65	0.382	0.119	0.881	0.263
																197.755	0.382	0.118	0.882	0.264
																197.92	0.378	0.118	0.882	0.26
																198.115	0.378	0.117	0.883	0.261
																198.385	0.378	0.117	0.883	0.261
																198.725	0.375	0.117	0.883	0.258
																198.94	0.375	0.116	0.884	0.259
																199.04	0.375	0.115	0.885	0.26
																199.125	0.372	0.115	0.885	0.257
																199.245	0.372	0.115	0.885	0.257
																199.35	0.369	0.115	0.885	0.254
																199.42	0.369	0.114	0.886	0.255
																199.45	0.366	0.114	0.886	0.252
																199.465	0.366	0.112	0.888	0.254
																199.51	0.366	0.112	0.888	0.254
																199.555	0.366	0.111	0.889	0.255
																199.795	0.363	0.111	0.889	0.252
																200.11	0.363	0.11	0.89	0.253
																200.285	0.363	0.11	0.89	0.253
																200.39	0.36	0.11	0.89	0.25
																200.405	0.36	0.109	0.891	0.251
																200.505	0.36	0.108	0.892	0.252
																200.665	0.357	0.108	0.892	0.249
																200.81	0.354	0.107	0.893	0.247
																200.975	0.354	0.107	0.893	0.247
																201.195	0.354	0.106	0.894	0.248
																201.36	0.354	0.105	0.895	0.249
																201.4	0.351	0.105	0.895	0.246
																201.42	0.351	0.104	0.896	0.247
																201.46	0.348	0.104	0.896	0.244
																201.58	0.348	0.103	0.897	0.245
																201.725	0.348	0.102	0.898	0.246
																201.94	0.348	0.102	0.898	0.246
																202.185	0.345	0.102	0.898	0.243
																202.295	0.342	0.102	0.898	0.24
																202.405	0.342	0.101	0.899	0.241
																202.5	0.342	0.1	0.9	0.242
																202.57	0.342	0.1	0.9	0.242
																202.64	0.342	0.099	0.901	0.243
																202.69	0.338	0.099	0.901	0.239
																202.8	0.338	0.098	0.902	0.24
																202.905	0.338	0.098	0.902	0.24
																202.975	0.335	0.098	0.902	0.237
																203.13	0.335	0.096	0.904	0.239
																203.335	0.332	0.096	0.904	0.236
																203.425	0.332	0.095	0.905	0.237
																203.45	0.332	0.095	0.905	0.237
																203.555	0.329	0.095	0.905	0.234
																203.675	0.326	0.095	0.905	0.231
																203.725	0.323	0.095	0.905	0.228
																203.765	0.32	0.095	0.905	0.225
																203.84	0.317	0.095	0.905	0.222
																204.03	0.314	0.095	0.905	0.219
																204.215	0.311	0.094	0.906	0.217
																204.335	0.308	0.094	0.906	0.214
																204.46	0.308	0.093	0.907	0.215
																204.535	0.305	0.093	0.907	0.212
																204.59	0.302	0.093	0.907	0.209
																204.68	0.302	0.093	0.907	0.209
																204.835	0.302	0.092	0.908	0.21
																205.075	0.298	0.092	0.908	0.206
																205.33	0.298	0.091	0.909	0.207
																205.475	0.298	0.09	0.91	0.208
																205.565	0.298	0.09	0.91	0.208
																205.715	0.295	0.09	0.91	0.205
																205.815	0.295	0.089	0.911	0.206
																205.855	0.292	0.089	0.911	0.203
																205.935	0.292	0.088	0.912	0.204
																206.015	0.292	0.088	0.912	0.204
																206.2	0.292	0.087	0.913	0.205
																206.38	0.292	0.085	0.915	0.207
																206.425	0.289	0.085	0.915	0.204
																206.46	0.289	0.085	0.915	0.204
																206.515	0.286	0.085	0.915	0.201
																206.63	0.283	0.085	0.915	0.198
																206.72	0.283	0.084	0.916	0.199
																206.83	0.28	0.084	0.916	0.196
																206.99	0.28	0.083	0.917	0.197
																207.13	0.28	0.083	0.917	0.197
																207.235	0.28	0.082	0.918	0.198
																207.325	0.277	0.082	0.918	0.195
																207.485	0.277	0.081	0.919	0.196
																207.625	0.274	0.081	0.919	0.193
																207.74	0.274	0.08	0.92	0.194
																207.905	0.274	0.08	0.92	0.194
																208.03	0.274	0.079	0.921	0.195
																208.13	0.271	0.079	0.921	0.192
																208.21	0.268	0.079	0.921	0.189
																208.45	0.268	0.078	0.922	0.19
																208.69	0.268	0.078	0.922	0.19
																208.88	0.268	0.077	0.923	0.191
																209.24	0.268	0.076	0.924	0.192
																209.44	0.265	0.076	0.924	0.189
																209.485	0.262	0.076	0.924	0.186
																209.555	0.262	0.075	0.925	0.187
																209.65	0.258	0.075	0.925	0.183
																209.725	0.258	0.074	0.926	0.184
																209.87	0.255	0.074	0.926	0.181
																210.04	0.252	0.074	0.926	0.178
																210.14	0.252	0.073	0.927	0.179
																210.2	0.249	0.073	0.927	0.176
																210.245	0.246	0.073	0.927	0.173
																210.305	0.246	0.073	0.927	0.173
																210.52	0.243	0.073	0.927	0.17
																210.735	0.243	0.072	0.928	0.171
																210.775	0.24	0.072	0.928	0.168
																210.865	0.24	0.071	0.929	0.169
																211.045	0.237	0.071	0.929	0.166
																211.16	0.234	0.071	0.929	0.163
																211.265	0.234	0.07	0.93	0.164
																211.435	0.231	0.07	0.93	0.161
																211.855	0.228	0.07	0.93	0.158
																212.31	0.225	0.07	0.93	0.155
																212.58	0.222	0.07	0.93	0.152
																212.825	0.222	0.07	0.93	0.152
																213.1	0.222	0.069	0.931	0.153
																213.295	0.222	0.068	0.932	0.154
																213.33	0.218	0.068	0.932	0.15
																213.475	0.212	0.068	0.932	0.144
																213.845	0.212	0.068	0.932	0.144
																214.155	0.212	0.067	0.933	0.145
																214.275	0.212	0.066	0.934	0.146
																214.38	0.212	0.065	0.935	0.147
																214.63	0.212	0.065	0.935	0.147
																214.895	0.212	0.064	0.936	0.148
																214.96	0.209	0.064	0.936	0.145
																214.99	0.206	0.064	0.936	0.142
																215.02	0.206	0.063	0.937	0.143
																215.035	0.206	0.063	0.937	0.143
																215.06	0.206	0.062	0.938	0.144
																215.11	0.206	0.061	0.939	0.145
																215.24	0.206	0.06	0.94	0.146
																215.515	0.203	0.06	0.94	0.143
																215.75	0.2	0.06	0.94	0.14
																215.835	0.2	0.06	0.94	0.14
																215.865	0.2	0.059	0.941	0.141
																215.92	0.2	0.058	0.942	0.142
																216.06	0.197	0.058	0.942	0.139
																216.3	0.194	0.058	0.942	0.136
																216.49	0.194	0.058	0.942	0.136
																216.7	0.191	0.058	0.942	0.133
																217.005	0.188	0.058	0.942	0.13
																217.145	0.185	0.058	0.942	0.127
																217.31	0.182	0.058	0.942	0.124
																217.53	0.182	0.057	0.943	0.125
																217.795	0.182	0.056	0.944	0.126
																218.03	0.182	0.056	0.944	0.126
																218.08	0.182	0.055	0.945	0.127
																218.19	0.182	0.054	0.946	0.128
																218.3	0.178	0.054	0.946	0.124
																218.485	0.175	0.054	0.946	0.121
																218.695	0.172	0.054	0.946	0.118
																218.81	0.172	0.053	0.947	0.119
																218.91	0.169	0.053	0.947	0.116
																218.95	0.169	0.053	0.947	0.116
																218.97	0.169	0.052	0.948	0.117
																219.015	0.169	0.051	0.949	0.118
																219.095	0.169	0.051	0.949	0.118
																219.16	0.169	0.05	0.95	0.119
																219.185	0.166	0.05	0.95	0.116
																219.25	0.166	0.049	0.951	0.117
																219.515	0.166	0.048	0.952	0.118
																219.755	0.163	0.048	0.952	0.115
																219.82	0.16	0.048	0.952	0.112
																219.86	0.157	0.048	0.952	0.109
																220	0.157	0.048	0.952	0.109
																220.43	0.157	0.047	0.953	0.11
																220.78	0.154	0.047	0.953	0.107
																221.01	0.154	0.046	0.954	0.108
																221.23	0.154	0.046	0.954	0.108
																221.3	0.154	0.045	0.955	0.109
																221.765	0.151	0.045	0.955	0.106
																222.305	0.148	0.045	0.955	0.103
																222.455	0.148	0.044	0.956	0.104
																222.615	0.148	0.043	0.957	0.105
																222.81	0.145	0.043	0.957	0.102
																223.08	0.145	0.043	0.957	0.102
																223.33	0.145	0.042	0.958	0.103
																223.405	0.142	0.042	0.958	0.1
																223.48	0.138	0.042	0.958	0.096
																223.58	0.138	0.041	0.959	0.097
																223.705	0.138	0.041	0.959	0.097
																224.41	0.135	0.041	0.959	0.094
																225.04	0.135	0.04	0.96	0.095
																225.075	0.135	0.039	0.961	0.096
																225.135	0.135	0.038	0.962	0.097
																225.275	0.132	0.038	0.962	0.094
																225.385	0.129	0.038	0.962	0.091
																225.545	0.126	0.038	0.962	0.088
																225.815	0.123	0.038	0.962	0.085
																226.06	0.12	0.038	0.962	0.082
																226.495	0.117	0.038	0.962	0.079
																226.85	0.114	0.038	0.962	0.076
																227.065	0.114	0.038	0.962	0.076
																227.445	0.114	0.037	0.963	0.077
																227.91	0.114	0.036	0.964	0.078
																228.21	0.111	0.036	0.964	0.075
																228.37	0.111	0.036	0.964	0.075
																228.61	0.111	0.035	0.965	0.076
																228.745	0.111	0.034	0.966	0.077
																229.235	0.108	0.034	0.966	0.074
																229.735	0.105	0.034	0.966	0.071
																229.795	0.105	0.033	0.967	0.072
																229.875	0.102	0.033	0.967	0.069
																229.945	0.102	0.033	0.967	0.069
																230.05	0.098	0.033	0.967	0.065
																230.215	0.098	0.032	0.968	0.066
																230.33	0.095	0.032	0.968	0.063
																230.36	0.092	0.032	0.968	0.06
																230.405	0.092	0.031	0.969	0.061
																230.785	0.089	0.031	0.969	0.058
																231.335	0.089	0.031	0.969	0.058
																231.63	0.086	0.031	0.969	0.055
																231.89	0.086	0.03	0.97	0.056
																232.065	0.083	0.03	0.97	0.053
																232.305	0.08	0.03	0.97	0.05
																233.17	0.08	0.029	0.971	0.051
																233.93	0.08	0.028	0.972	0.052
																234.265	0.08	0.028	0.972	0.052
																234.85	0.08	0.027	0.973	0.053
																235.6	0.08	0.026	0.974	0.054
																236.15	0.077	0.026	0.974	0.051
																236.335	0.077	0.026	0.974	0.051
																236.535	0.077	0.025	0.975	0.052
																236.96	0.077	0.024	0.976	0.053
																237.685	0.077	0.023	0.977	0.054
																238.26	0.074	0.023	0.977	0.051
																238.49	0.071	0.023	0.977	0.048
																238.675	0.071	0.023	0.977	0.048
																239.03	0.068	0.023	0.977	0.045
																239.52	0.065	0.023	0.977	0.042
																239.785	0.062	0.023	0.977	0.039
																239.895	0.062	0.022	0.978	0.04
																240.185	0.062	0.021	0.979	0.041
																240.59	0.062	0.021	0.979	0.041
																240.98	0.062	0.02	0.98	0.042
																241.48	0.062	0.019	0.981	0.043
																242.05	0.062	0.019	0.981	0.043
																242.665	0.058	0.019	0.981	0.039
																243	0.055	0.019	0.981	0.036
																243.075	0.055	0.018	0.982	0.037
																243.455	0.055	0.017	0.983	0.038
																243.88	0.055	0.016	0.984	0.039
																244.07	0.055	0.016	0.984	0.039
																244.26	0.055	0.015	0.985	0.04
																244.41	0.052	0.015	0.985	0.037
																244.915	0.049	0.015	0.985	0.034
																245.385	0.046	0.015	0.985	0.031
																245.46	0.046	0.014	0.986	0.032
																245.745	0.046	0.014	0.986	0.032
																246.565	0.046	0.013	0.987	0.033
																247.555	0.046	0.012	0.988	0.034
																248.515	0.043	0.012	0.988	0.031
																249.33	0.043	0.011	0.989	0.032
																249.65	0.04	0.011	0.989	0.029
																249.885	0.04	0.011	0.989	0.029
																250.335	0.04	0.01	0.99	0.03
																250.63	0.04	0.009	0.991	0.031
																250.675	0.037	0.009	0.991	0.028
																250.8	0.034	0.009	0.991	0.025
																251.525	0.031	0.009	0.991	0.022
																252.455	0.031	0.009	0.991	0.022
																252.93	0.028	0.009	0.991	0.019
																253.145	0.025	0.009	0.991	0.016
																253.32	0.025	0.008	0.992	0.017
																253.74	0.022	0.008	0.992	0.014
																254.395	0.022	0.007	0.993	0.015
																255.225	0.018	0.007	0.993	0.011
																256.085	0.015	0.007	0.993	0.008
																256.94	0.015	0.006	0.994	0.009
																258.545	0.012	0.006	0.994	0.006
																260.03	0.012	0.006	0.994	0.006
																261.605	0.009	0.006	0.994	0.003
																264.1	0.009	0.005	0.995	0.004
																265.66	0.009	0.004	0.996	0.005
																267.645	0.009	0.004	0.996	0.005
																270.78	0.009	0.003	0.997	0.006
																273.075	0.009	0.002	0.998	0.007
																277.3	0.009	0.001	0.999	0.008
																284.93	0.006	0.001	0.999	0.005
																289.97	0.003	0.001	0.999	0.002
																296.645	0.003	0.001	0.999	0.002
																313.075	0	0.001	0.999	-0.001
																324.6	0	0	1	0
																检验结果变量 TYGBMI 至少有一个在正实际状态组与负实际状态组之间的绑定值。
																a 最小分界值为最小实测检验值减 1，最大分界值为最大实测检验值加 1。所有其他分界值均为两个连续的有序实测检验值的平均值。

## Sheet: 血糖ROC 
曲线下方的区域									曲线下方的区域							曲线下方的区域
检验结果变量: TYG									检验结果变量: BMI							检验结果变量: TYGBMI
区域	标准 错误a	渐近显著性b	渐近 95% 置信区间						区域	标准 错误a	渐近显著性b	渐近 95% 置信区间				区域	标准 错误a	渐近显著性b	渐近 95% 置信区间
			下限	上限								下限	上限						下限	上限
0.825	0.016	0	0.794	0.857					0.714	0.021	0	0.673	0.756			0.787	0.019	0	0.75	0.825
检验结果变量 TYG 至少有一个在正实际状态组与负实际状态组之间的绑定值。统计可能有偏差。									检验结果变量 BMI 至少有一个在正实际状态组与负实际状态组之间的绑定值。统计可能有偏差。							检验结果变量 TYGBMI 至少有一个在正实际状态组与负实际状态组之间的绑定值。统计可能有偏差。
a 按非参数假定									a 按非参数假定							a 按非参数假定
b 原假设：真区域 = 0.5									b 原假设：真区域 = 0.5							b 原假设：真区域 = 0.5
曲线的坐标									曲线的坐标							曲线的坐标
检验结果变量: TYG									检验结果变量: BMI							检验结果变量: TYGBMI
大于或等于此值时为正a	敏感度	1 - 特异性	特异性	约登					大于或等于此值时为正a	敏感度	1 - 特异性	特异性	约登			大于或等于此值时为正a	敏感度	1 - 特异性	特异性	约登
7.085	0.793	0.267	0.733	0.526	0.526				24.835	0.72	0.359	0.641	0.361			175.705	0.772	0.302	0.698	0.47
7.095	0.779	0.26	0.74	0.519					24.845	0.713	0.356	0.644	0.357	0.361		175.75	0.766	0.302	0.698	0.464
7.105	0.772	0.257	0.743	0.515					24.855	0.713	0.355	0.645	0.358			175.79	0.766	0.302	0.698	0.464	0.47
7.115	0.766	0.256	0.744	0.51					24.865	0.699	0.355	0.645	0.344			175.805	0.759	0.302	0.698	0.457
7.125	0.759	0.249	0.751	0.51					24.875	0.685	0.354	0.646	0.331			175.83	0.759	0.301	0.699	0.458
7.135	0.752	0.241	0.759	0.511					24.885	0.685	0.353	0.647	0.332			175.86	0.759	0.3	0.7	0.459
7.145	0.738	0.237	0.763	0.501					24.895	0.678	0.353	0.647	0.325			175.895	0.759	0.3	0.7	0.459
7.155	0.717	0.235	0.765	0.482					24.905	0.678	0.352	0.648	0.326			175.93	0.759	0.299	0.701	0.46
7.165	0.717	0.233	0.767	0.484					24.915	0.678	0.351	0.649	0.327			176.015	0.759	0.298	0.702	0.461
7.175	0.703	0.23	0.77	0.473					24.93	0.678	0.35	0.65	0.328			176.12	0.759	0.298	0.702	0.461
7.185	0.703	0.226	0.774	0.477					24.945	0.678	0.348	0.652	0.33			176.16	0.759	0.297	0.703	0.462
7.195	0.697	0.223	0.777	0.474					24.955	0.678	0.348	0.652	0.33			176.185	0.759	0.296	0.704	0.463
7.205	0.683	0.218	0.782	0.465					24.965	0.671	0.346	0.654	0.325			176.22	0.759	0.295	0.705	0.464
7.215	0.683	0.215	0.785	0.468					24.975	0.671	0.344	0.656	0.327			176.25	0.759	0.295	0.705	0.464
7.225	0.683	0.208	0.792	0.475					24.985	0.664	0.342	0.658	0.322			176.27	0.759	0.294	0.706	0.465
7.235	0.669	0.204	0.796	0.465					24.995	0.664	0.342	0.658	0.322			176.29	0.759	0.293	0.707	0.466
7.245	0.648	0.195	0.805	0.453					25.015	0.664	0.339	0.661	0.325			176.325	0.759	0.293	0.707	0.466
7.255	0.648	0.194	0.806	0.454					25.035	0.664	0.338	0.662	0.326			176.37	0.759	0.291	0.709	0.468
7.265	0.634	0.191	0.809	0.443					25.045	0.657	0.337	0.663	0.32			176.395	0.759	0.291	0.709	0.468
7.275	0.621	0.188	0.812	0.433					25.055	0.65	0.336	0.664	0.314			176.415	0.752	0.291	0.709	0.461
7.285	0.621	0.184	0.816	0.437					25.07	0.65	0.335	0.665	0.315			176.44	0.752	0.29	0.71	0.462
7.295	0.614	0.18	0.82	0.434					25.085	0.65	0.333	0.667	0.317			176.485	0.752	0.29	0.71	0.462
7.305	0.607	0.177	0.823	0.43					25.095	0.643	0.332	0.668	0.311			176.63	0.745	0.29	0.71	0.455
7.315	0.607	0.175	0.825	0.432					25.105	0.643	0.331	0.669	0.312			176.845	0.745	0.289	0.711	0.456
7.325	0.607	0.171	0.829	0.436					25.115	0.643	0.329	0.671	0.314			177.005	0.745	0.288	0.712	0.457
7.335	0.6	0.167	0.833	0.433					25.125	0.643	0.327	0.673	0.316			177.085	0.745	0.288	0.712	0.457
7.345	0.6	0.165	0.835	0.435					25.135	0.643	0.326	0.674	0.317			177.115	0.738	0.288	0.712	0.45
7.355	0.593	0.16	0.84	0.433					25.145	0.643	0.326	0.674	0.317			177.165	0.738	0.287	0.713	0.451
7.365	0.579	0.155	0.845	0.424					25.155	0.643	0.324	0.676	0.319			177.255	0.738	0.286	0.714	0.452
7.375	0.572	0.15	0.85	0.422					25.165	0.643	0.322	0.678	0.321			177.305	0.738	0.286	0.714	0.452
7.385	0.552	0.146	0.854	0.406					25.175	0.643	0.321	0.679	0.322			177.445	0.738	0.285	0.715	0.453
7.395	0.545	0.141	0.859	0.404					25.19	0.643	0.32	0.68	0.323			177.595	0.731	0.285	0.715	0.446
7.405	0.538	0.138	0.862	0.4					25.205	0.643	0.319	0.681	0.324			177.63	0.731	0.285	0.715	0.446
7.415	0.524	0.134	0.866	0.39					25.22	0.643	0.318	0.682	0.325			177.68	0.731	0.284	0.716	0.447
7.425	0.517	0.133	0.867	0.384					25.235	0.636	0.317	0.683	0.319			177.875	0.731	0.283	0.717	0.448
7.435	0.51	0.127	0.873	0.383					25.245	0.636	0.314	0.686	0.322			178.08	0.731	0.283	0.717	0.448
7.445	0.51	0.123	0.877	0.387					25.26	0.622	0.313	0.687	0.309			178.15	0.731	0.282	0.718	0.449
7.455	0.503	0.119	0.881	0.384					25.275	0.622	0.312	0.688	0.31			178.215	0.724	0.282	0.718	0.442
7.465	0.497	0.116	0.884	0.381					25.29	0.622	0.311	0.689	0.311			178.285	0.724	0.281	0.719	0.443
7.475	0.497	0.112	0.888	0.385					25.305	0.622	0.31	0.69	0.312			178.34	0.724	0.281	0.719	0.443
7.485	0.49	0.109	0.891	0.381					25.315	0.622	0.309	0.691	0.313			178.38	0.724	0.28	0.72	0.444
7.495	0.483	0.103	0.897	0.38					25.325	0.615	0.309	0.691	0.306			178.445	0.724	0.279	0.721	0.445
7.505	0.476	0.097	0.903	0.379					25.335	0.615	0.308	0.692	0.307			178.51	0.724	0.279	0.721	0.445
7.515	0.462	0.092	0.908	0.37					25.345	0.615	0.307	0.693	0.308			178.565	0.724	0.278	0.722	0.446
7.525	0.448	0.088	0.912	0.36					25.355	0.615	0.307	0.693	0.308			178.62	0.724	0.278	0.722	0.446
7.535	0.428	0.085	0.915	0.343					25.365	0.615	0.306	0.694	0.309			178.69	0.724	0.277	0.723	0.447
7.545	0.414	0.083	0.917	0.331					25.375	0.615	0.306	0.694	0.309			178.755	0.724	0.276	0.724	0.448
7.555	0.407	0.081	0.919	0.326					25.385	0.615	0.304	0.696	0.311			178.8	0.724	0.275	0.725	0.449
7.565	0.393	0.079	0.921	0.314					25.395	0.615	0.301	0.699	0.314			178.85	0.724	0.274	0.726	0.45
7.575	0.386	0.077	0.923	0.309					25.405	0.615	0.3	0.7	0.315			178.9	0.724	0.274	0.726	0.45
7.585	0.386	0.076	0.924	0.31					25.415	0.615	0.299	0.701	0.316			178.945	0.724	0.273	0.727	0.451
7.595	0.379	0.073	0.927	0.306					25.425	0.608	0.298	0.702	0.31			178.965	0.724	0.273	0.727	0.451
7.605	0.372	0.071	0.929	0.301					25.435	0.608	0.297	0.703	0.311			179.03	0.724	0.272	0.728	0.452
7.615	0.372	0.07	0.93	0.302					25.445	0.608	0.296	0.704	0.312			179.12	0.724	0.271	0.729	0.453
7.625	0.372	0.068	0.932	0.304					25.455	0.608	0.294	0.706	0.314			179.18	0.724	0.271	0.729	0.453
7.635	0.359	0.066	0.934	0.293					25.465	0.608	0.292	0.708	0.316			179.215	0.724	0.27	0.73	0.454
7.645	0.359	0.065	0.935	0.294					25.475	0.608	0.291	0.709	0.317			179.26	0.724	0.269	0.731	0.455
7.655	0.352	0.063	0.937	0.289					25.49	0.608	0.289	0.711	0.319			179.33	0.724	0.269	0.731	0.455
7.665	0.345	0.061	0.939	0.284					25.505	0.601	0.289	0.711	0.312			179.375	0.717	0.269	0.731	0.448
7.675	0.331	0.061	0.939	0.27					25.515	0.601	0.287	0.713	0.314			179.425	0.717	0.268	0.732	0.449
7.685	0.324	0.059	0.941	0.265					25.525	0.594	0.285	0.715	0.309			179.48	0.71	0.268	0.732	0.442
7.695	0.324	0.058	0.942	0.266					25.54	0.594	0.283	0.717	0.311			179.545	0.71	0.268	0.732	0.442
7.705	0.324	0.056	0.944	0.268					25.555	0.594	0.279	0.721	0.315			179.625	0.71	0.267	0.733	0.443
7.715	0.317	0.054	0.946	0.263					25.575	0.594	0.278	0.722	0.316			179.695	0.703	0.267	0.733	0.436
7.725	0.317	0.054	0.946	0.263					25.595	0.594	0.277	0.723	0.317			179.735	0.697	0.267	0.733	0.43
7.735	0.317	0.052	0.948	0.265					25.61	0.594	0.276	0.724	0.318			179.775	0.697	0.266	0.734	0.431
7.745	0.317	0.051	0.949	0.266					25.63	0.594	0.274	0.726	0.32			179.905	0.697	0.266	0.734	0.431
7.76	0.317	0.05	0.95	0.267					25.645	0.594	0.274	0.726	0.32			180.03	0.69	0.266	0.734	0.424
7.775	0.31	0.05	0.95	0.26					25.655	0.587	0.273	0.727	0.314			180.21	0.69	0.264	0.736	0.426
7.785	0.31	0.045	0.955	0.265					25.665	0.58	0.273	0.727	0.307			180.395	0.69	0.263	0.737	0.427
7.795	0.31	0.045	0.955	0.265					25.675	0.573	0.273	0.727	0.3			180.445	0.69	0.262	0.738	0.428
7.805	0.31	0.043	0.957	0.267					25.685	0.566	0.272	0.728	0.294			180.555	0.69	0.262	0.738	0.428
7.815	0.303	0.04	0.96	0.263					25.695	0.559	0.272	0.728	0.287			180.695	0.69	0.261	0.739	0.429
7.825	0.303	0.038	0.962	0.265					25.705	0.552	0.271	0.729	0.281			180.855	0.69	0.261	0.739	0.429
7.835	0.303	0.038	0.962	0.265					25.715	0.545	0.269	0.731	0.276			180.975	0.69	0.26	0.74	0.43
7.845	0.297	0.038	0.962	0.259					25.725	0.538	0.267	0.733	0.271			181	0.69	0.259	0.741	0.431
7.86	0.283	0.038	0.962	0.245					25.735	0.531	0.266	0.734	0.265			181.1	0.69	0.259	0.741	0.431
7.875	0.283	0.037	0.963	0.246					25.745	0.531	0.265	0.735	0.266			181.245	0.69	0.258	0.742	0.432
7.885	0.283	0.035	0.965	0.248					25.755	0.524	0.264	0.736	0.26			181.335	0.69	0.257	0.743	0.433
7.895	0.276	0.033	0.967	0.243					25.765	0.517	0.264	0.736	0.253			181.375	0.69	0.257	0.743	0.433
7.905	0.269	0.033	0.967	0.236					25.775	0.517	0.263	0.737	0.254			181.525	0.69	0.256	0.744	0.434
7.915	0.262	0.033	0.967	0.229					25.785	0.517	0.263	0.737	0.254			181.67	0.683	0.256	0.744	0.427
7.925	0.255	0.032	0.968	0.223					25.795	0.517	0.262	0.738	0.255			181.7	0.683	0.256	0.744	0.427
7.935	0.241	0.03	0.97	0.211					25.805	0.517	0.261	0.739	0.256			181.73	0.683	0.255	0.745	0.428
7.95	0.228	0.03	0.97	0.198					25.815	0.517	0.26	0.74	0.257			181.755	0.683	0.254	0.746	0.429
7.965	0.221	0.029	0.971	0.192					25.83	0.517	0.259	0.741	0.258			181.815	0.683	0.254	0.746	0.429
7.975	0.214	0.029	0.971	0.185					25.845	0.517	0.258	0.742	0.259			182.005	0.683	0.253	0.747	0.43
7.985	0.207	0.028	0.972	0.179					25.855	0.517	0.257	0.743	0.26			182.18	0.683	0.252	0.748	0.431
7.995	0.2	0.027	0.973	0.173					25.87	0.517	0.256	0.744	0.261			182.235	0.683	0.252	0.748	0.431
8.005	0.2	0.026	0.974	0.174					25.89	0.517	0.254	0.746	0.263			182.295	0.683	0.251	0.749	0.432
8.015	0.186	0.025	0.975	0.161					25.905	0.517	0.253	0.747	0.264			182.355	0.676	0.251	0.749	0.425
8.025	0.179	0.025	0.975	0.154					25.92	0.517	0.252	0.748	0.265			182.43	0.669	0.251	0.749	0.418
8.045	0.179	0.024	0.976	0.155					25.935	0.517	0.251	0.749	0.266			182.5	0.669	0.25	0.75	0.419
8.065	0.179	0.023	0.977	0.156					25.95	0.517	0.25	0.75	0.267			182.565	0.669	0.25	0.75	0.419
8.08	0.172	0.023	0.977	0.149					25.965	0.517	0.249	0.751	0.268			182.645	0.669	0.249	0.751	0.42
8.095	0.172	0.022	0.978	0.15					25.975	0.517	0.248	0.752	0.269			182.685	0.669	0.249	0.751	0.42
8.115	0.172	0.021	0.979	0.151					25.985	0.517	0.247	0.753	0.27			182.71	0.669	0.247	0.753	0.422
8.135	0.166	0.021	0.979	0.145					25.995	0.517	0.247	0.753	0.27			182.735	0.669	0.246	0.754	0.423
8.145	0.166	0.02	0.98	0.146					26.005	0.517	0.245	0.755	0.272			182.745	0.662	0.246	0.754	0.416
8.155	0.166	0.019	0.981	0.147					26.015	0.517	0.244	0.756	0.273			182.765	0.662	0.245	0.755	0.417
8.165	0.166	0.017	0.983	0.149					26.03	0.51	0.244	0.756	0.266			182.82	0.662	0.245	0.755	0.417
8.175	0.159	0.016	0.984	0.143					26.05	0.51	0.241	0.759	0.269			182.925	0.662	0.244	0.756	0.418
8.19	0.159	0.015	0.985	0.144					26.07	0.51	0.24	0.76	0.27			183.025	0.662	0.243	0.757	0.419
8.21	0.152	0.014	0.986	0.138					26.09	0.51	0.238	0.762	0.272			183.1	0.662	0.242	0.758	0.42
8.225	0.145	0.014	0.986	0.131					26.11	0.51	0.237	0.763	0.273			183.155	0.662	0.241	0.759	0.421
8.235	0.145	0.013	0.987	0.132					26.125	0.51	0.236	0.764	0.274			183.235	0.662	0.24	0.76	0.422
8.245	0.145	0.012	0.988	0.133					26.14	0.503	0.236	0.764	0.267			183.39	0.662	0.24	0.76	0.422
8.26	0.138	0.012	0.988	0.126					26.155	0.503	0.235	0.765	0.268			183.53	0.662	0.239	0.761	0.423
8.285	0.131	0.012	0.988	0.119					26.17	0.503	0.234	0.766	0.269			183.615	0.662	0.238	0.762	0.424
8.305	0.131	0.011	0.989	0.12					26.185	0.497	0.234	0.766	0.263			183.675	0.662	0.238	0.762	0.424
8.32	0.131	0.011	0.989	0.12					26.195	0.497	0.232	0.768	0.265			183.73	0.662	0.237	0.763	0.425
8.335	0.124	0.011	0.989	0.113					26.205	0.497	0.231	0.769	0.266			183.795	0.662	0.237	0.763	0.425
8.345	0.124	0.01	0.99	0.114					26.215	0.497	0.23	0.77	0.267			183.835	0.662	0.236	0.764	0.426
8.355	0.124	0.009	0.991	0.115					26.225	0.497	0.23	0.77	0.267			183.865	0.662	0.235	0.765	0.427
8.365	0.11	0.009	0.991	0.101					26.245	0.497	0.228	0.772	0.269			183.93	0.662	0.235	0.765	0.427
8.38	0.097	0.009	0.991	0.088					26.265	0.497	0.226	0.774	0.271			184.015	0.662	0.234	0.766	0.428
8.395	0.097	0.008	0.992	0.089					26.275	0.497	0.225	0.775	0.272			184.12	0.655	0.234	0.766	0.421
8.405	0.09	0.008	0.992	0.082					26.285	0.497	0.225	0.775	0.272			184.23	0.655	0.233	0.767	0.422
8.415	0.083	0.008	0.992	0.075					26.295	0.497	0.223	0.777	0.274			184.31	0.655	0.232	0.768	0.423
8.425	0.076	0.008	0.992	0.068					26.305	0.497	0.223	0.777	0.274			184.425	0.655	0.231	0.769	0.424
8.435	0.069	0.007	0.993	0.062					26.315	0.49	0.222	0.778	0.268			184.515	0.655	0.23	0.77	0.425
8.465	0.069	0.006	0.994	0.063					26.33	0.49	0.221	0.779	0.269			184.54	0.655	0.23	0.77	0.425
8.495	0.062	0.006	0.994	0.056					26.345	0.49	0.22	0.78	0.27			184.59	0.655	0.229	0.771	0.426
8.505	0.062	0.005	0.995	0.057					26.355	0.49	0.219	0.781	0.271			184.635	0.648	0.229	0.771	0.419
8.52	0.055	0.004	0.996	0.051					26.365	0.49	0.217	0.783	0.273			184.665	0.648	0.228	0.772	0.42
8.545	0.055	0.004	0.996	0.051					26.375	0.49	0.217	0.783	0.273			184.69	0.648	0.228	0.772	0.42
8.565	0.055	0.003	0.997	0.052					26.39	0.49	0.216	0.784	0.274			184.73	0.648	0.227	0.773	0.421
8.62	0.055	0.002	0.998	0.053					26.405	0.49	0.216	0.784	0.274			184.77	0.648	0.226	0.774	0.422
8.69	0.048	0.002	0.998	0.046					26.415	0.49	0.215	0.785	0.275			184.845	0.648	0.226	0.774	0.422
8.725	0.048	0.001	0.999	0.047					26.425	0.49	0.214	0.786	0.276			184.995	0.648	0.225	0.775	0.423
8.83	0.041	0.001	0.999	0.04					26.435	0.49	0.213	0.787	0.277			185.285	0.648	0.225	0.775	0.423
8.975	0.034	0.001	0.999	0.033					26.45	0.49	0.211	0.789	0.279			185.52	0.648	0.224	0.776	0.424
9.135	0.034	0.001	0.999	0.033					26.465	0.49	0.21	0.79	0.28			185.575	0.641	0.224	0.776	0.417
9.285	0.028	0.001	0.999	0.027					26.475	0.49	0.209	0.791	0.281			185.61	0.634	0.224	0.776	0.41
9.34	0.021	0.001	0.999	0.02					26.485	0.49	0.208	0.792	0.282			185.63	0.634	0.223	0.777	0.411
9.405	0.014	0.001	0.999	0.013					26.5	0.49	0.206	0.794	0.284			185.715	0.634	0.223	0.777	0.411
9.545	0.014	0	1	0.014					26.515	0.49	0.206	0.794	0.284			185.805	0.634	0.222	0.778	0.412
9.75	0.007	0	1	0.007					26.525	0.49	0.205	0.795	0.285			185.84	0.634	0.221	0.779	0.413
10.87	0	0	1	0					26.535	0.49	0.204	0.796	0.286			185.87	0.628	0.221	0.779	0.407
检验结果变量 TYG 至少有一个在正实际状态组与负实际状态组之间的绑定值。									26.545	0.49	0.203	0.797	0.287			185.955	0.628	0.221	0.779	0.407
a 最小分界值为最小实测检验值减 1，最大分界值为最大实测检验值加 1。所有其他分界值均为两个连续的有序实测检验值的平均值。									26.555	0.483	0.201	0.799	0.282			186.08	0.628	0.22	0.78	0.408
									26.565	0.483	0.2	0.8	0.283			186.195	0.628	0.22	0.78	0.408
									26.585	0.483	0.199	0.801	0.284			186.295	0.628	0.219	0.781	0.409
									26.605	0.483	0.197	0.803	0.286			186.36	0.628	0.218	0.782	0.41
									26.615	0.483	0.195	0.805	0.288			186.405	0.621	0.218	0.782	0.403
									26.625	0.483	0.193	0.807	0.29			186.435	0.621	0.218	0.782	0.403
									26.635	0.476	0.19	0.81	0.286			186.495	0.621	0.217	0.783	0.404
									26.645	0.476	0.189	0.811	0.287			186.6	0.621	0.216	0.784	0.405
									26.655	0.469	0.188	0.812	0.281			186.745	0.621	0.216	0.784	0.405
									26.665	0.469	0.185	0.815	0.284			186.855	0.621	0.215	0.785	0.406
									26.675	0.469	0.184	0.816	0.285			186.91	0.621	0.214	0.786	0.407
									26.685	0.469	0.183	0.817	0.286			186.96	0.621	0.213	0.787	0.408
									26.695	0.469	0.182	0.818	0.287			187.015	0.614	0.213	0.787	0.401
									26.705	0.469	0.18	0.82	0.289			187.14	0.614	0.212	0.788	0.402
									26.715	0.462	0.179	0.821	0.283			187.24	0.614	0.211	0.789	0.403
									26.725	0.462	0.177	0.823	0.285			187.3	0.614	0.211	0.789	0.403
									26.735	0.462	0.176	0.824	0.286			187.37	0.614	0.21	0.79	0.404
									26.755	0.462	0.175	0.825	0.287			187.405	0.607	0.21	0.79	0.397
									26.775	0.462	0.175	0.825	0.287			187.455	0.607	0.209	0.791	0.398
									26.785	0.462	0.174	0.826	0.288			187.51	0.607	0.208	0.792	0.399
									26.795	0.462	0.173	0.827	0.289			187.55	0.607	0.208	0.792	0.399
									26.805	0.462	0.172	0.828	0.29			187.605	0.6	0.208	0.792	0.392
									26.815	0.455	0.172	0.828	0.283			187.65	0.6	0.207	0.793	0.393
									26.83	0.455	0.171	0.829	0.284			187.67	0.6	0.206	0.794	0.394
									26.845	0.448	0.17	0.83	0.278			187.69	0.6	0.206	0.794	0.394
									26.87	0.448	0.168	0.832	0.28			187.73	0.6	0.205	0.795	0.395
									26.895	0.448	0.168	0.832	0.28			187.89	0.6	0.204	0.796	0.396
									26.915	0.448	0.167	0.833	0.281			188.115	0.6	0.204	0.796	0.396
									26.945	0.441	0.166	0.834	0.275			188.22	0.6	0.203	0.797	0.397
									26.97	0.441	0.166	0.834	0.275			188.295	0.6	0.203	0.797	0.397
									26.985	0.434	0.166	0.834	0.268			188.46	0.6	0.202	0.798	0.398
									26.995	0.427	0.164	0.836	0.263			188.57	0.6	0.201	0.799	0.399
									27.01	0.42	0.163	0.837	0.257			188.59	0.6	0.2	0.8	0.4
									27.025	0.42	0.162	0.838	0.258			188.66	0.6	0.199	0.801	0.401
									27.035	0.42	0.162	0.838	0.258			188.755	0.6	0.199	0.801	0.401
									27.05	0.413	0.162	0.838	0.251			188.86	0.6	0.198	0.802	0.402
									27.065	0.406	0.162	0.838	0.244			188.935	0.6	0.197	0.803	0.403
									27.075	0.406	0.161	0.839	0.245			188.945	0.6	0.197	0.803	0.403
									27.09	0.406	0.161	0.839	0.245			189	0.593	0.196	0.804	0.397
									27.105	0.406	0.159	0.841	0.247			189.06	0.593	0.195	0.805	0.398
									27.12	0.406	0.158	0.842	0.248			189.08	0.593	0.194	0.806	0.399
									27.155	0.406	0.157	0.843	0.249			189.145	0.593	0.194	0.806	0.399
									27.205	0.406	0.157	0.843	0.249			189.21	0.593	0.193	0.807	0.4
									27.235	0.406	0.156	0.844	0.25			189.225	0.593	0.192	0.808	0.401
									27.245	0.406	0.155	0.845	0.251			189.24	0.593	0.192	0.808	0.401
									27.255	0.399	0.154	0.846	0.245			189.255	0.593	0.191	0.809	0.402
									27.275	0.399	0.153	0.847	0.246			189.305	0.593	0.191	0.809	0.402
									27.295	0.399	0.153	0.847	0.246			189.365	0.593	0.19	0.81	0.403
									27.305	0.392	0.151	0.849	0.241			189.39	0.593	0.189	0.811	0.404
									27.315	0.392	0.151	0.849	0.241			189.485	0.593	0.189	0.811	0.404
									27.325	0.392	0.15	0.85	0.242			189.59	0.586	0.189	0.811	0.397
									27.335	0.392	0.148	0.852	0.244			189.635	0.586	0.188	0.812	0.398
									27.345	0.392	0.146	0.854	0.246			189.685	0.586	0.187	0.813	0.399
									27.355	0.385	0.146	0.854	0.239			189.725	0.586	0.187	0.813	0.399
									27.37	0.385	0.144	0.856	0.241			189.76	0.586	0.186	0.814	0.4
									27.39	0.385	0.143	0.857	0.242			189.85	0.586	0.185	0.815	0.401
									27.41	0.385	0.142	0.858	0.243			189.925	0.586	0.185	0.815	0.401
									27.425	0.371	0.142	0.858	0.229			189.98	0.586	0.184	0.816	0.402
									27.435	0.357	0.142	0.858	0.215			190.035	0.586	0.183	0.817	0.403
									27.445	0.357	0.142	0.858	0.215			190.085	0.586	0.182	0.818	0.404
									27.46	0.357	0.141	0.859	0.216			190.15	0.586	0.182	0.818	0.404
									27.49	0.357	0.14	0.86	0.217			190.2	0.586	0.181	0.819	0.405
									27.52	0.35	0.14	0.86	0.21			190.255	0.586	0.18	0.82	0.406
									27.54	0.35	0.139	0.861	0.211			190.285	0.586	0.179	0.821	0.407
									27.56	0.35	0.136	0.864	0.214			190.335	0.586	0.179	0.821	0.407
									27.575	0.35	0.135	0.865	0.215			190.435	0.586	0.178	0.822	0.408
									27.585	0.343	0.135	0.865	0.208			190.51	0.586	0.177	0.823	0.409
									27.595	0.343	0.134	0.866	0.209			190.54	0.586	0.177	0.823	0.409
									27.61	0.343	0.133	0.867	0.21			190.555	0.586	0.176	0.824	0.41
									27.63	0.343	0.132	0.868	0.211			190.61	0.586	0.175	0.825	0.411
									27.645	0.343	0.131	0.869	0.212			190.705	0.586	0.175	0.825	0.411
									27.655	0.336	0.13	0.87	0.206			190.82	0.586	0.174	0.826	0.412
									27.665	0.322	0.129	0.871	0.193			190.925	0.586	0.173	0.827	0.413
									27.675	0.322	0.128	0.872	0.194			191.015	0.586	0.172	0.828	0.414
									27.7	0.322	0.127	0.873	0.195			191.14	0.586	0.171	0.829	0.415
									27.725	0.322	0.126	0.874	0.196			191.265	0.586	0.17	0.83	0.416
									27.735	0.322	0.126	0.874	0.196			191.335	0.586	0.17	0.83	0.416
									27.745	0.322	0.124	0.876	0.198			191.36	0.586	0.169	0.831	0.417
									27.765	0.315	0.124	0.876	0.191			191.395	0.586	0.168	0.832	0.418
									27.785	0.315	0.124	0.876	0.191			191.49	0.579	0.168	0.832	0.411
									27.8	0.315	0.123	0.877	0.192			191.68	0.579	0.168	0.832	0.411
									27.815	0.308	0.122	0.878	0.186			191.98	0.572	0.168	0.832	0.404
									27.825	0.308	0.122	0.878	0.186			192.23	0.572	0.167	0.833	0.405
									27.84	0.308	0.121	0.879	0.187			192.31	0.572	0.167	0.833	0.405
									27.86	0.301	0.12	0.88	0.181			192.33	0.572	0.166	0.834	0.406
									27.88	0.301	0.119	0.881	0.182			192.365	0.572	0.165	0.835	0.407
									27.895	0.301	0.118	0.882	0.183			192.415	0.572	0.165	0.835	0.407
									27.905	0.294	0.118	0.882	0.176			192.465	0.566	0.165	0.835	0.401
									27.915	0.294	0.118	0.882	0.176			192.52	0.566	0.164	0.836	0.402
									27.93	0.294	0.117	0.883	0.177			192.59	0.566	0.163	0.837	0.403
									27.95	0.294	0.117	0.883	0.177			192.645	0.559	0.163	0.837	0.396
									27.965	0.294	0.116	0.884	0.178			192.89	0.559	0.162	0.838	0.397
									27.975	0.294	0.114	0.886	0.18			193.13	0.559	0.162	0.838	0.397
									27.985	0.294	0.113	0.887	0.181			193.24	0.559	0.161	0.839	0.398
									27.995	0.294	0.113	0.887	0.181			193.415	0.559	0.16	0.84	0.399
									28.02	0.294	0.112	0.888	0.182			193.52	0.552	0.16	0.84	0.392
									28.045	0.294	0.111	0.889	0.183			193.58	0.552	0.16	0.84	0.392
									28.065	0.294	0.11	0.89	0.184			193.695	0.552	0.159	0.841	0.393
									28.1	0.294	0.109	0.891	0.185			193.8	0.552	0.158	0.842	0.394
									28.125	0.28	0.109	0.891	0.171			193.89	0.552	0.158	0.842	0.394
									28.135	0.28	0.109	0.891	0.171			194.08	0.552	0.157	0.843	0.395
									28.145	0.28	0.108	0.892	0.172			194.205	0.552	0.156	0.844	0.396
									28.155	0.28	0.107	0.893	0.173			194.22	0.552	0.155	0.845	0.397
									28.165	0.266	0.107	0.893	0.159			194.3	0.552	0.155	0.845	0.397
									28.175	0.259	0.107	0.893	0.152			194.385	0.552	0.154	0.846	0.398
									28.185	0.259	0.107	0.893	0.152			194.405	0.552	0.153	0.847	0.399
									28.195	0.252	0.107	0.893	0.145			194.43	0.552	0.153	0.847	0.399
									28.21	0.245	0.106	0.894	0.139			194.48	0.545	0.153	0.847	0.392
									28.225	0.245	0.105	0.895	0.14			194.52	0.545	0.152	0.848	0.393
									28.235	0.245	0.104	0.896	0.141			194.585	0.545	0.151	0.849	0.394
									28.245	0.238	0.104	0.896	0.134			194.79	0.545	0.151	0.849	0.394
									28.255	0.238	0.103	0.897	0.135			194.96	0.545	0.15	0.85	0.395
									28.265	0.238	0.102	0.898	0.136			195.01	0.545	0.15	0.85	0.395
									28.275	0.231	0.102	0.898	0.129			195.065	0.545	0.149	0.851	0.396
									28.29	0.224	0.101	0.899	0.123			195.135	0.538	0.148	0.852	0.39
									28.31	0.224	0.1	0.9	0.124			195.325	0.538	0.148	0.852	0.39
									28.33	0.224	0.098	0.902	0.126			195.525	0.538	0.147	0.853	0.391
									28.36	0.224	0.096	0.904	0.128			195.59	0.538	0.146	0.854	0.392
									28.385	0.224	0.094	0.906	0.13			195.64	0.538	0.146	0.854	0.392
									28.395	0.217	0.094	0.906	0.123			195.73	0.538	0.145	0.855	0.393
									28.43	0.217	0.094	0.906	0.123			195.88	0.538	0.144	0.856	0.394
									28.465	0.217	0.093	0.907	0.124			196.065	0.538	0.144	0.856	0.394
									28.485	0.217	0.093	0.907	0.124			196.2	0.538	0.143	0.857	0.395
									28.505	0.217	0.092	0.908	0.125			196.26	0.538	0.143	0.857	0.395
									28.515	0.217	0.091	0.909	0.126			196.3	0.538	0.142	0.858	0.396
									28.53	0.217	0.09	0.91	0.127			196.4	0.538	0.141	0.859	0.397
									28.555	0.21	0.089	0.911	0.121			196.54	0.538	0.141	0.859	0.397
									28.575	0.21	0.089	0.911	0.121			196.685	0.531	0.141	0.859	0.39
									28.605	0.203	0.089	0.911	0.114			196.91	0.531	0.14	0.86	0.391
									28.635	0.203	0.088	0.912	0.115			197.12	0.531	0.139	0.861	0.392
									28.645	0.203	0.087	0.913	0.116			197.225	0.531	0.138	0.862	0.393
									28.665	0.203	0.086	0.914	0.117			197.315	0.531	0.138	0.862	0.393
									28.69	0.196	0.085	0.915	0.111			197.375	0.524	0.138	0.862	0.386
									28.715	0.196	0.084	0.916	0.112			197.44	0.517	0.138	0.862	0.379
									28.735	0.196	0.083	0.917	0.113			197.535	0.517	0.137	0.863	0.38
									28.745	0.196	0.082	0.918	0.114			197.65	0.517	0.136	0.864	0.381
									28.76	0.196	0.082	0.918	0.114			197.755	0.517	0.136	0.864	0.381
									28.795	0.196	0.081	0.919	0.115			197.92	0.517	0.135	0.865	0.382
									28.835	0.196	0.08	0.92	0.116			198.115	0.517	0.134	0.866	0.383
									28.87	0.189	0.08	0.92	0.109			198.385	0.517	0.134	0.866	0.383
									28.895	0.189	0.08	0.92	0.109			198.725	0.517	0.133	0.867	0.384
									28.915	0.189	0.079	0.921	0.11			198.94	0.517	0.132	0.868	0.385
									28.94	0.189	0.077	0.923	0.112			199.04	0.517	0.132	0.868	0.385
									28.955	0.189	0.075	0.925	0.114			199.125	0.517	0.131	0.869	0.386
									28.97	0.189	0.074	0.926	0.115			199.245	0.517	0.131	0.869	0.386
									28.99	0.182	0.074	0.926	0.108			199.35	0.517	0.13	0.87	0.387
									29.015	0.182	0.074	0.926	0.108			199.42	0.517	0.129	0.871	0.388
									29.04	0.182	0.073	0.927	0.109			199.45	0.517	0.129	0.871	0.388
									29.06	0.175	0.072	0.928	0.103			199.465	0.51	0.128	0.872	0.382
									29.08	0.168	0.072	0.928	0.096			199.51	0.51	0.127	0.873	0.383
									29.095	0.168	0.071	0.929	0.097			199.555	0.51	0.127	0.873	0.383
									29.12	0.168	0.071	0.929	0.097			199.795	0.503	0.127	0.873	0.376
									29.15	0.161	0.069	0.931	0.092			200.11	0.497	0.127	0.873	0.37
									29.175	0.161	0.068	0.932	0.093			200.285	0.49	0.127	0.873	0.363
									29.195	0.161	0.067	0.933	0.094			200.39	0.49	0.126	0.874	0.364
									29.21	0.161	0.067	0.933	0.094			200.405	0.49	0.126	0.874	0.364
									29.225	0.161	0.066	0.934	0.095			200.505	0.49	0.125	0.875	0.365
									29.255	0.161	0.065	0.935	0.096			200.665	0.49	0.124	0.876	0.366
									29.3	0.161	0.064	0.936	0.097			200.81	0.49	0.123	0.877	0.367
									29.34	0.161	0.063	0.937	0.098			200.975	0.49	0.122	0.878	0.368
									29.365	0.161	0.062	0.938	0.099			201.195	0.49	0.122	0.878	0.368
									29.375	0.161	0.061	0.939	0.1			201.36	0.49	0.121	0.879	0.369
									29.385	0.161	0.061	0.939	0.1			201.4	0.49	0.12	0.88	0.37
									29.395	0.161	0.06	0.94	0.101			201.42	0.483	0.12	0.88	0.363
									29.405	0.161	0.06	0.94	0.101			201.46	0.483	0.119	0.881	0.364
									29.425	0.161	0.059	0.941	0.102			201.58	0.483	0.119	0.881	0.364
									29.455	0.161	0.058	0.942	0.103			201.725	0.476	0.119	0.881	0.357
									29.51	0.161	0.058	0.942	0.103			201.94	0.469	0.119	0.881	0.35
									29.565	0.161	0.057	0.943	0.104			202.185	0.469	0.118	0.882	0.351
									29.585	0.161	0.056	0.944	0.105			202.295	0.469	0.117	0.883	0.352
									29.6	0.161	0.056	0.944	0.105			202.405	0.462	0.117	0.883	0.345
									29.615	0.161	0.055	0.945	0.106			202.5	0.462	0.117	0.883	0.345
									29.63	0.161	0.054	0.946	0.107			202.57	0.462	0.116	0.884	0.346
									29.655	0.154	0.053	0.947	0.101			202.64	0.462	0.115	0.885	0.347
									29.7	0.147	0.053	0.947	0.094			202.69	0.462	0.115	0.885	0.347
									29.735	0.133	0.053	0.947	0.08			202.8	0.462	0.114	0.886	0.348
									29.765	0.133	0.052	0.948	0.081			202.905	0.455	0.114	0.886	0.341
									29.81	0.133	0.051	0.949	0.082			202.975	0.455	0.114	0.886	0.341
									29.835	0.126	0.051	0.949	0.075			203.13	0.455	0.112	0.888	0.343
									29.85	0.126	0.05	0.95	0.076			203.335	0.455	0.112	0.888	0.343
									29.87	0.126	0.05	0.95	0.076			203.425	0.448	0.112	0.888	0.336
									29.895	0.126	0.049	0.951	0.077			203.45	0.448	0.111	0.889	0.337
									29.925	0.126	0.049	0.951	0.077			203.555	0.448	0.11	0.89	0.338
									29.955	0.119	0.048	0.952	0.071			203.675	0.441	0.11	0.89	0.331
									29.975	0.119	0.047	0.953	0.072			203.725	0.441	0.11	0.89	0.331
									30.005	0.112	0.047	0.953	0.065			203.765	0.441	0.109	0.891	0.332
									30.04	0.112	0.047	0.953	0.065			203.84	0.441	0.109	0.891	0.332
									30.075	0.112	0.046	0.954	0.066			204.03	0.441	0.108	0.892	0.333
									30.11	0.098	0.046	0.954	0.052			204.215	0.434	0.107	0.893	0.327
									30.14	0.098	0.045	0.955	0.053			204.335	0.434	0.107	0.893	0.327
									30.175	0.098	0.044	0.956	0.054			204.46	0.434	0.106	0.894	0.328
									30.2	0.098	0.043	0.957	0.055			204.535	0.434	0.105	0.895	0.329
									30.225	0.098	0.043	0.957	0.055			204.59	0.434	0.105	0.895	0.329
									30.255	0.098	0.042	0.958	0.056			204.68	0.434	0.104	0.896	0.33
									30.28	0.098	0.041	0.959	0.057			204.835	0.434	0.103	0.897	0.331
									30.31	0.098	0.041	0.959	0.057			205.075	0.434	0.103	0.897	0.331
									30.35	0.098	0.04	0.96	0.058			205.33	0.428	0.103	0.897	0.325
									30.39	0.098	0.039	0.961	0.059			205.475	0.421	0.103	0.897	0.318
									30.425	0.098	0.039	0.961	0.059			205.565	0.421	0.102	0.898	0.319
									30.465	0.098	0.038	0.962	0.06			205.715	0.421	0.102	0.898	0.319
									30.505	0.098	0.038	0.962	0.06			205.815	0.414	0.102	0.898	0.312
									30.535	0.091	0.038	0.962	0.053			205.855	0.414	0.101	0.899	0.313
									30.565	0.091	0.037	0.963	0.054			205.935	0.407	0.101	0.899	0.306
									30.64	0.091	0.036	0.964	0.055			206.015	0.407	0.1	0.9	0.307
									30.705	0.091	0.036	0.964	0.055			206.2	0.407	0.1	0.9	0.307
									30.735	0.091	0.035	0.965	0.056			206.38	0.407	0.098	0.902	0.309
									30.765	0.091	0.034	0.966	0.057			206.425	0.407	0.098	0.902	0.309
									30.795	0.091	0.034	0.966	0.057			206.46	0.407	0.097	0.903	0.31
									30.86	0.084	0.032	0.968	0.052			206.515	0.407	0.097	0.903	0.31
									30.905	0.084	0.032	0.968	0.052			206.63	0.407	0.096	0.904	0.311
									30.925	0.084	0.031	0.969	0.053			206.72	0.407	0.095	0.905	0.312
									30.985	0.084	0.03	0.97	0.054			206.83	0.407	0.095	0.905	0.312
									31.035	0.084	0.03	0.97	0.054			206.99	0.407	0.094	0.906	0.313
									31.08	0.084	0.029	0.971	0.055			207.13	0.407	0.093	0.907	0.314
									31.13	0.084	0.028	0.972	0.056			207.235	0.4	0.093	0.907	0.307
									31.175	0.077	0.028	0.972	0.049			207.325	0.4	0.093	0.907	0.307
									31.225	0.077	0.027	0.973	0.05			207.485	0.393	0.093	0.907	0.3
									31.265	0.07	0.027	0.973	0.043			207.625	0.393	0.092	0.908	0.301
									31.3	0.07	0.027	0.973	0.043			207.74	0.393	0.091	0.909	0.302
									31.365	0.07	0.026	0.974	0.044			207.905	0.393	0.091	0.909	0.302
									31.425	0.063	0.026	0.974	0.037			208.03	0.393	0.09	0.91	0.303
									31.49	0.063	0.025	0.975	0.038			208.13	0.393	0.09	0.91	0.303
									31.56	0.063	0.024	0.976	0.039			208.21	0.393	0.089	0.911	0.304
									31.68	0.056	0.024	0.976	0.032			208.45	0.386	0.089	0.911	0.297
									31.795	0.056	0.023	0.977	0.033			208.69	0.386	0.088	0.912	0.298
									31.84	0.056	0.023	0.977	0.033			208.88	0.379	0.088	0.912	0.291
									31.905	0.056	0.021	0.979	0.035			209.24	0.372	0.088	0.912	0.284
									31.935	0.056	0.021	0.979	0.035			209.44	0.372	0.088	0.912	0.284
									31.975	0.042	0.021	0.979	0.021			209.485	0.366	0.088	0.912	0.278
									32.03	0.035	0.02	0.98	0.015			209.555	0.366	0.086	0.914	0.28
									32.065	0.035	0.019	0.981	0.016			209.65	0.366	0.086	0.914	0.28
									32.1	0.028	0.019	0.981	0.009			209.725	0.359	0.086	0.914	0.273
									32.185	0.028	0.019	0.981	0.009			209.87	0.359	0.085	0.915	0.274
									32.31	0.028	0.018	0.982	0.01			210.04	0.359	0.085	0.915	0.274
									32.41	0.028	0.017	0.983	0.011			210.14	0.359	0.084	0.916	0.275
									32.455	0.028	0.017	0.983	0.011			210.2	0.352	0.084	0.916	0.268
									32.525	0.028	0.016	0.984	0.012			210.245	0.345	0.084	0.916	0.261
									32.61	0.028	0.016	0.984	0.012			210.305	0.345	0.083	0.917	0.262
									32.745	0.028	0.015	0.985	0.013			210.52	0.345	0.083	0.917	0.262
									32.865	0.028	0.014	0.986	0.014			210.735	0.345	0.082	0.918	0.263
									32.9	0.028	0.014	0.986	0.014			210.775	0.345	0.081	0.919	0.264
									32.95	0.028	0.012	0.988	0.016			210.865	0.338	0.081	0.919	0.257
									32.985	0.028	0.012	0.988	0.016			211.045	0.331	0.081	0.919	0.25
									33.035	0.028	0.011	0.989	0.017			211.16	0.331	0.081	0.919	0.25
									33.125	0.028	0.01	0.99	0.018			211.265	0.331	0.08	0.92	0.251
									33.195	0.028	0.01	0.99	0.018			211.435	0.331	0.079	0.921	0.252
									33.275	0.028	0.009	0.991	0.019			211.855	0.324	0.079	0.921	0.245
									33.725	0.028	0.008	0.992	0.02			212.31	0.324	0.079	0.921	0.245
									34.285	0.028	0.008	0.992	0.02			212.58	0.317	0.079	0.921	0.238
									34.495	0.028	0.007	0.993	0.021			212.825	0.317	0.078	0.922	0.239
									34.575	0.028	0.006	0.994	0.022			213.1	0.317	0.078	0.922	0.239
									34.695	0.021	0.006	0.994	0.015			213.295	0.317	0.077	0.923	0.24
									34.935	0.021	0.006	0.994	0.015			213.33	0.31	0.077	0.923	0.233
									35.105	0.021	0.005	0.995	0.016			213.475	0.31	0.076	0.924	0.234
									35.25	0.014	0.005	0.995	0.009			213.845	0.303	0.076	0.924	0.227
									35.395	0.007	0.005	0.995	0.002			214.155	0.303	0.075	0.925	0.228
									35.51	0.007	0.005	0.995	0.002			214.275	0.303	0.074	0.926	0.229
									35.94	0.007	0.004	0.996	0.003			214.38	0.303	0.074	0.926	0.229
									36.495	0	0.004	0.996	-0.004			214.63	0.303	0.073	0.927	0.23
									36.75	0	0.003	0.997	-0.003			214.895	0.297	0.073	0.927	0.224
									36.88	0	0.003	0.997	-0.003			214.96	0.297	0.073	0.927	0.224
									37.175	0	0.002	0.998	-0.002			214.99	0.297	0.072	0.928	0.225
									38.09	0	0.001	0.999	-0.001			215.02	0.297	0.071	0.929	0.226
									39.795	0	0.001	0.999	-0.001			215.035	0.297	0.071	0.929	0.226
									41.77	0	0	1	0			215.06	0.297	0.07	0.93	0.227
									检验结果变量 BMI 至少有一个在正实际状态组与负实际状态组之间的绑定值。							215.11	0.297	0.069	0.931	0.228
									a 最小分界值为最小实测检验值减 1，最大分界值为最大实测检验值加 1。所有其他分界值均为两个连续的有序实测检验值的平均值。							215.24	0.297	0.069	0.931	0.228
																215.515	0.29	0.069	0.931	0.221
																215.75	0.29	0.068	0.932	0.222
																215.835	0.29	0.068	0.932	0.222
																215.865	0.29	0.067	0.933	0.223
																215.92	0.29	0.066	0.934	0.224
																216.06	0.283	0.066	0.934	0.217
																216.3	0.283	0.066	0.934	0.217
																216.49	0.283	0.065	0.935	0.218
																216.7	0.283	0.064	0.936	0.219
																217.005	0.283	0.064	0.936	0.219
																217.145	0.283	0.063	0.937	0.22
																217.31	0.283	0.062	0.938	0.221
																217.53	0.283	0.062	0.938	0.221
																217.795	0.283	0.061	0.939	0.222
																218.03	0.283	0.061	0.939	0.222
																218.08	0.283	0.06	0.94	0.223
																218.19	0.283	0.059	0.941	0.224
																218.3	0.283	0.059	0.941	0.224
																218.485	0.283	0.058	0.942	0.225
																218.695	0.283	0.057	0.943	0.226
																218.81	0.283	0.057	0.943	0.226
																218.91	0.283	0.056	0.944	0.227
																218.95	0.283	0.056	0.944	0.227
																218.97	0.283	0.055	0.945	0.228
																219.015	0.276	0.055	0.945	0.221
																219.095	0.276	0.054	0.946	0.222
																219.16	0.269	0.054	0.946	0.215
																219.185	0.269	0.054	0.946	0.215
																219.25	0.262	0.054	0.946	0.208
																219.515	0.262	0.053	0.947	0.209
																219.755	0.262	0.052	0.948	0.21
																219.82	0.262	0.052	0.948	0.21
																219.86	0.262	0.051	0.949	0.211
																220	0.255	0.051	0.949	0.204
																220.43	0.255	0.05	0.95	0.205
																220.78	0.255	0.05	0.95	0.205
																221.01	0.248	0.05	0.95	0.198
																221.23	0.248	0.049	0.951	0.199
																221.3	0.248	0.049	0.951	0.199
																221.765	0.248	0.048	0.952	0.2
																222.305	0.248	0.047	0.953	0.201
																222.455	0.248	0.047	0.953	0.201
																222.615	0.241	0.047	0.953	0.194
																222.81	0.241	0.046	0.954	0.195
																223.08	0.241	0.045	0.955	0.196
																223.33	0.234	0.045	0.955	0.189
																223.405	0.234	0.045	0.955	0.189
																223.48	0.234	0.044	0.956	0.19
																223.58	0.228	0.044	0.956	0.184
																223.705	0.228	0.044	0.956	0.184
																224.41	0.228	0.043	0.957	0.185
																225.04	0.228	0.042	0.958	0.186
																225.075	0.228	0.042	0.958	0.186
																225.135	0.228	0.041	0.959	0.187
																225.275	0.228	0.04	0.96	0.188
																225.385	0.221	0.04	0.96	0.181
																225.545	0.214	0.04	0.96	0.174
																225.815	0.214	0.04	0.96	0.174
																226.06	0.214	0.039	0.961	0.175
																226.495	0.207	0.039	0.961	0.168
																226.85	0.2	0.039	0.961	0.161
																227.065	0.193	0.039	0.961	0.154
																227.445	0.193	0.038	0.962	0.155
																227.91	0.193	0.038	0.962	0.155
																228.21	0.186	0.038	0.962	0.148
																228.37	0.186	0.037	0.963	0.149
																228.61	0.186	0.037	0.963	0.149
																228.745	0.186	0.036	0.964	0.15
																229.235	0.186	0.035	0.965	0.151
																229.735	0.179	0.035	0.965	0.144
																229.795	0.179	0.035	0.965	0.144
																229.875	0.179	0.034	0.966	0.145
																229.945	0.172	0.034	0.966	0.138
																230.05	0.166	0.034	0.966	0.132
																230.215	0.166	0.033	0.967	0.133
																230.33	0.159	0.033	0.967	0.126
																230.36	0.159	0.033	0.967	0.126
																230.405	0.152	0.033	0.967	0.119
																230.785	0.152	0.032	0.968	0.12
																231.335	0.152	0.032	0.968	0.12
																231.63	0.152	0.031	0.969	0.121
																231.89	0.152	0.03	0.97	0.122
																232.065	0.152	0.03	0.97	0.122
																232.305	0.152	0.029	0.971	0.123
																233.17	0.145	0.029	0.971	0.116
																233.93	0.138	0.029	0.971	0.109
																234.265	0.138	0.028	0.972	0.11
																234.85	0.138	0.028	0.972	0.11
																235.6	0.138	0.027	0.973	0.111
																236.15	0.138	0.026	0.974	0.112
																236.335	0.138	0.026	0.974	0.112
																236.535	0.138	0.025	0.975	0.113
																236.96	0.138	0.025	0.975	0.113
																237.685	0.131	0.025	0.975	0.106
																238.26	0.124	0.025	0.975	0.099
																238.49	0.124	0.024	0.976	0.1
																238.675	0.124	0.023	0.977	0.101
																239.03	0.124	0.023	0.977	0.101
																239.52	0.124	0.022	0.978	0.102
																239.785	0.124	0.021	0.979	0.103
																239.895	0.117	0.021	0.979	0.096
																240.185	0.11	0.021	0.979	0.089
																240.59	0.103	0.021	0.979	0.082
																240.98	0.097	0.021	0.979	0.076
																241.48	0.097	0.021	0.979	0.076
																242.05	0.097	0.02	0.98	0.077
																242.665	0.097	0.02	0.98	0.077
																243	0.09	0.02	0.98	0.07
																243.075	0.09	0.019	0.981	0.071
																243.455	0.083	0.019	0.981	0.064
																243.88	0.083	0.018	0.982	0.065
																244.07	0.076	0.018	0.982	0.058
																244.26	0.069	0.018	0.982	0.051
																244.41	0.062	0.018	0.982	0.044
																244.915	0.062	0.018	0.982	0.044
																245.385	0.062	0.017	0.983	0.045
																245.46	0.062	0.016	0.984	0.046
																245.745	0.062	0.016	0.984	0.046
																246.565	0.062	0.015	0.985	0.047
																247.555	0.062	0.015	0.985	0.047
																248.515	0.062	0.014	0.986	0.048
																249.33	0.062	0.013	0.987	0.049
																249.65	0.062	0.013	0.987	0.049
																249.885	0.055	0.013	0.987	0.042
																250.335	0.055	0.012	0.988	0.043
																250.63	0.048	0.012	0.988	0.036
																250.675	0.041	0.012	0.988	0.029
																250.8	0.041	0.011	0.989	0.03
																251.525	0.041	0.011	0.989	0.03
																252.455	0.041	0.01	0.99	0.031
																252.93	0.034	0.01	0.99	0.024
																253.145	0.028	0.01	0.99	0.018
																253.32	0.021	0.01	0.99	0.011
																253.74	0.021	0.009	0.991	0.012
																254.395	0.021	0.009	0.991	0.012
																255.225	0.021	0.008	0.992	0.013
																256.085	0.021	0.008	0.992	0.013
																256.94	0.021	0.007	0.993	0.014
																258.545	0.021	0.006	0.994	0.015
																260.03	0.021	0.006	0.994	0.015
																261.605	0.014	0.006	0.994	0.008
																264.1	0.014	0.005	0.995	0.009
																265.66	0.014	0.004	0.996	0.01
																267.645	0.014	0.004	0.996	0.01
																270.78	0.014	0.003	0.997	0.011
																273.075	0.014	0.003	0.997	0.011
																277.3	0.014	0.002	0.998	0.012
																284.93	0.014	0.001	0.999	0.013
																289.97	0.014	0.001	0.999	0.013
																296.645	0.014	0	1	0.014
																313.075	0.007	0	1	0.007
																324.6	0	0	1	0
																检验结果变量 TYGBMI 至少有一个在正实际状态组与负实际状态组之间的绑定值。
																a 最小分界值为最小实测检验值减 1，最大分界值为最大实测检验值加 1。所有其他分界值均为两个连续的有序实测检验值的平均值。

## Sheet: 模型
HUA		Model 1		Model 2		Model 3		模型3：性别、收，舒，AST、ALT、尿素、HDL、r					TC、LDL VIF值大
		OR (95%CI)	P	OR (95%CI)	P	OR (95%CI)	P	模型2：收、舒
TyG		3.669(2.963,4.544)	<0.001	3.133(2.497,3.932）	<0.001	1.731（1.321，2.267）	<0.001
Q1(5.24，6.40）	n=428	Ref		Ref		Ref
Q2(6.40,6.78)	n=435	1.832(1.114,3.011)	0.017	1.641(0.994,2.709)	0.053	1.215(0.701,2.106)	0.487
Q3(6.78,7.22)	n=419	4.139(2.635,6.504)	<0.001	3.478(2.193,5.515)	<0.001	1.899(1.131,3.187)	0.015
Q4(7.22,9.87)	n=438	8.908(5.760,13.777)	<0.001	6.676(4.234,10.529)	<0.001	2.668(1.554,4.581)	<0.001
BMI		1.258(1.210,1.307)	<0.001	1.223（1.174，1.274）	<0.001	1.128（1.079，1.180）	<0.001
Q1(15.63，21.64）	n=419	Ref		Ref		Ref
Q2(21.64,23.87)	n=423	3.227(1.828,5.694)	<0.001	3.046(1.724,5.385)	<0.001	2.196(1.195,4.036)	0.011	方程中的变量
Q3(23.87,26.26)	n=421	6.110(3.561,10.483)	<0.001	5.169(2.980,8.964)	<0.001	2.423(1.327,4.425)	0.004			显著性	Exp(B)	EXP(B) 的 95% 置信区间
Q4(26.26,40.77)	n=424	15.397(9.123,25.986)	<0.001	12.352(7.189,21.222)	<0.001	4.755(2.603,8.688)	<0.001					下限	上限
TYGBMI		1.022(1.018,1.026)	<0.001	1.019（1.015，1.023）	<0.001	1.009(1.005,1.013)	<0.001	步骤 1a	TYGBMI反数	0
Q1(97.52,140.26)	n=422	Ref		Ref		Ref			TYGBMI反数(1)	0	11.791	4.667	29.788
Q2(140.26,160.81)	n=422	2.208(1.263,3.859)	0.005	2.112(1.206,3.699)	0.009	1.769(0.979,3.198)	0.059		TYGBMI反数(2)	0	5.92	2.339	14.982
Q3(160.81,187.38)	n=421	6.910(4.187,11.405)	<0.001	6.239(3.742,10.404)	<0.001	2.993(1.715,5.224)	<0.001		TYGBMI反数(3)	0.155	2.108	0.754	5.896
Q4(187.38,323.60)	n=465	14.572(8.939,23.753)	<0.001	12.111(7.253,20.223)	<0.001	4.565(2.562,8.132)	<0.001		性别 (1)	0.7	0.921	0.607	1.398
Diabetes									收缩压	0	1.039	1.026	1.052
		Model 1		Model 2		Model 3			舒张压	0.027	0.976	0.954	0.997
		OR (95%CI)	P	OR (95%CI)	P	OR (95%CI)	P		谷丙转氨酶	0.187	1.01	0.995	1.024
TyG		6.897（5.077，9.370）	<0.001	6.218（4.475，8.639）	<0.001	6.295(4.281,9.259）	<0.001		谷草转氨酶	0.958	1.001	0.976	1.026
Q1(5.24，6.40）	n=428	Ref		Ref		Ref			尿素	0	1.546	1.329	1.797
Q2(6.40,6.78)	n=435	6.428(1.430,28.894)	0.015	5.282(1.167,23.910)	0.031	5.589(1.174,26.598)	0.031		γ-谷氨酰转肽酶	0.339	1.002	0.998	1.007
Q3(6.78,7.22)	n=419	17.310(4.122,72.694)	<0.001	11.809(2.781,50.138)	0.001	12.705(2.846,55.722)	<0.001		高密度脂蛋白	0.104	0.549	0.267	1.131
Q4(7.22,9.87)	n=438	65.599(16.062,267.920)	<0.001	43.272(10.451,179.164)	<0.001	41.832(9.415,185.862)	<0.001		肌酐	0	0.965	0.951	0.979
BMI		1.205（1.150，1.262）	<0.001	1.144（1.086，2.205）	<0.001	1.089(1.023,1.158)	0.004		常量	0	0.001
Q1(15.63，21.64）	n=419	Ref		Ref		Ref		a 在步骤 1 输入的变量：TYGBMI反数, 性别 , 收缩压, 舒张压 , 谷丙转氨酶, 谷草转氨酶 , 尿素 , γ-谷氨酰转肽酶, 高密度脂蛋白, 肌酐 。
Q2(21.64,23.87)	n=423	1.742(0.788,3.850)	0.17	1.545(0.689,3.464)	0.291	1.407(0.607,3.263)	0.426
Q3(23.87,26.26)	n=421	4.929(2.449,9.917)	<0.001	3.462(1.671,7.172)	0.001	2.794(1.287,6.069)	0.009
Q4(26.26,40.77)	n=424	8.447(4.291,16.625)	<0.001	5.273(2.578,10.784)	0.001	3.711(1.698,8.110)	0.001
TYGBMI		1.027（1.022，1.032）	<0.001	1.023（1.018，1.029）	<0.001	1.019(1.012,1.025)	<0.001	方程中的变量
Q1(97.52,140.26)	n=422	Ref		Ref		Ref				显著性	Exp(B)	EXP(B) 的 95% 置信区间
Q2(140.26,160.81)	n=422	2.244(0.835,6.034)	0.109	2.123(0.784,5.749)	0.139	2.108(0.754,5.896)	0.155					下限	上限
Q3(160.81,187.38)	n=421	7.570(3.166,18.099)	<0.001	5.735(2.361,13.928)	<0.001	5.920(2.339,14.982)	<0.001	步骤 1a	TYG	0	3.669	2.963	4.544
Q4(187.38,323.60)	n=465	20.466(8.839,47.296)	<0.001	14.153(5.947,33.685)	<0.001	11.791(4.667,29.788)	<0.001		常量	0	0
								a 在步骤 1 输入的变量：TYG。

## Sheet: S1
Supplementary Table 1: Univariate Linear Regression of Serum Uric Acid
Serum Uric Acid	B	t	R	R2	P
SBP	1.156	10.232	0.239	0.057	0
DBP	1.873	10.27	0.24	0.058	0
BMI	7.409	18.419	0.409	0.167	0
FPG	3.46	1.846	0.044	0.002	0
TC	15.216	7.162	0.17	0.029	0
TG	32.315	16.183	0.363	0.132	0
HDL	-89.176	-13.253	0.304	0.092	0
LDL	27.569	9.939	0.233	0.054	0
ALT	0.847	9.589	0.225	0.05	0
AST	0.829	5.191	0.124	0.015	0
γ-GT	0.82	13.37	0.306	0.094	0
Cr	3.045	25.37	0.521	0.271	0
BUN	18.165	12.475	0.287	0.083	0
TyG	57.143	18.079	0.399	0.159	0
TyG-BMI	0.743	15.99	0.359	0.129	0
BloodGluose	B	t	R	R2	P
Age	0.018	9.163	0.215	0.046	0
SBP	0.019	13.077	0.3	0.09	0
DBP	0.022	9.147	0.215	0.046	0
BMI	0.077	9.912	0.235	0.055	0
TG	0.26	9.719	0.228	0.052	0
HDL	-0.594	-6.648	0.158	0.025	0
ALT	0.008	6.735	0.16	0.026	0
AST	0.009	4.223	0.101	0.01	0
γ-GT	0.005	6.602	0.157	0.025	0
Cr	0.003	1.857	0.045	0.002	0
BUN	0.124	6.424	0.152	0.023	0
UA	0.001	1.846	0.044	0.002	0
TyG	0.865	22.199	0.471	0.222	0
TyG-BMI	0.008	13.148	0.302	0.091	0

## Sheet: S2
Supplemental Table 2: Univariate Logistic Regression of HUA
HUA	OR(95%CI)	P value
SBP	1.026（1.019-1.033）	＜0.001										下限	上限
DBP	1.044（1.033-1.056）	＜0.001		方程中的变量
BMI	1.258（1.210-1.307）	＜0.001				B	标准误差	瓦尔德	自由度	显著性	Exp(B)	EXP(B) 的 95% 置信区间
FPG	1.135（1.033-1.246）	＜0.001										下限	上限
TC	1.454（1.285-1.645）	＜0.001		步骤 1a	空腹血糖	0.126	0.048	7.02	1	0.008	1.135	1.033	1.246
TG	2.009（1.756-2.299）	＜0.001			常量	-2.127	0.259	67.221	1	0	0.119
HDL	0.101（0.062-0.166）	＜0.001		a 在步骤 1 输入的变量：空腹血糖 。
LDL	1.932（1.636-2.281）	＜0.001
ALT	1.024（1.017-1.030）	＜0.001
AST	1.019（1.009-1.029）	＜0.001
γ-GT	1.021（1.016-1.026）	＜0.001
Cr	1.081（1.070-1.093）	＜0.001
BUN	1.478（1.346-1.624）	＜0.001
TyG	3.669（2.963-4.544）	＜0.001
TyG-BMI	1.022（1.018-1.026）	＜0.001
T2MD
Age	1.052（1.043-1.060）	＜0.001
SBP	1.095（1.085-1.106）	＜0.001
DBP	1.104（1.091-1.118）	＜0.001
BMI	1.173（1.135-1.213）	＜0.001
TG	1.196（1.070-1.337）	0.002
HDL	0.556（0.380-0.815）	0.003
ALT	1.008（1.003-1.013）	＜0.001
AST	1.016（1.007-1.026）	＜0.001
γ-GT	1.010（1.006-1.015）	＜0.001
Cr	1.029（1.020-1.037）	＜0.001
BUN	1.237（1.141-1.341）	＜0.001
UA	1.005（1.003-1.006）	＜0.001
TyG	2.414（2.006-2.904）	＜0.001
TyG-BMI	1.013（1.010-1.016）	＜0.001

## Sheet: Sheet1
方程中的变量											方程中的变量
		B	标准误差	瓦尔德	自由度	显著性	Exp(B)	EXP(B) 的 95% 置信区间					B	标准误差	瓦尔德	自由度	显著性	Exp(B)	EXP(B) 的 95% 置信区间
								下限	上限										下限	上限
步骤 1a	TYG反数			19.788	3	0					步骤 1a	TYGBMI反数			31.778	3	0
	TYG反数(1)	1.002	0.262	14.644	1	0	2.724	1.631	4.552			TYGBMI反数(1)	1.518	0.295	26.554	1	0	4.565	2.562	8.132
	TYG反数(2)	0.757	0.249	9.259	1	0.002	2.131	1.309	3.47			TYGBMI反数(2)	1.096	0.284	14.875	1	0	2.993	1.715	5.224
	TYG反数(3)	0.275	0.266	1.066	1	0.302	1.316	0.781	2.218			TYGBMI反数(3)	0.571	0.302	3.57	1	0.059	1.769	0.979	3.198
	收缩压	0.01	0.005	3.3	1	0.069	1.01	0.999	1.02			性别 (1)	1.236	0.181	46.719	1	0	3.442	2.415	4.907
	舒张压	0.006	0.009	0.469	1	0.493	1.006	0.989	1.023			收缩压	0.005	0.006	0.669	1	0.414	1.005	0.993	1.016
	谷丙转氨酶	0.029	0.007	18.824	1	0	1.029	1.016	1.043			舒张压	-0.001	0.01	0.004	1	0.951	0.999	0.981	1.018
	谷草转氨酶	-0.044	0.012	13.348	1	0	0.957	0.934	0.98			谷丙转氨酶	0.032	0.007	20.38	1	0	1.032	1.018	1.047
	尿素	0.339	0.053	40.826	1	0	1.403	1.265	1.557			谷草转氨酶	-0.05	0.013	14.256	1	0	0.951	0.927	0.976
	γ-谷氨酰转肽酶	0.009	0.003	12.755	1	0	1.009	1.004	1.015			尿素	0.074	0.065	1.309	1	0.252	1.077	0.949	1.222
	高密度脂蛋白	-1.347	0.288	21.899	1	0	0.26	0.148	0.457			γ-谷氨酰转肽酶	0.009	0.003	11.384	1	0.001	1.009	1.004	1.014
	常量	-3.642	0.708	26.466	1	0	0.026					高密度脂蛋白	-1.073	0.3	12.749	1	0	0.342	0.19	0.616
a 在步骤 1 输入的变量：TYG反数, 收缩压, 舒张压 , 谷丙转氨酶, 谷草转氨酶 , 尿素 , γ-谷氨酰转肽酶, 高密度脂蛋白。												肌酐	0.07	0.007	107.631	1	0	1.072	1.058	1.086
												常量	-6.92	0.841	67.704	1	0	0.001
方程中的变量											a 在步骤 1 输入的变量：TYGBMI反数, 性别 , 收缩压, 舒张压 , 谷丙转氨酶, 谷草转氨酶 , 尿素 , γ-谷氨酰转肽酶, 高密度脂蛋白, 肌酐 。
		B	标准误差	瓦尔德	自由度	显著性	Exp(B)	EXP(B) 的 95% 置信区间
								下限	上限
步骤 1a	BMI反数			39.253	3	0
	BMI反数(1)	1.676	0.296	32.025	1	0	5.345	2.991	9.553
	BMI反数(2)	1.054	0.297	12.616	1	0	2.868	1.604	5.129
	BMI反数(3)	0.831	0.299	7.722	1	0.005	2.296	1.278	4.127
	收缩压	0.012	0.005	4.981	1	0.026	1.012	1.001	1.023
	舒张压	-0.005	0.009	0.323	1	0.57	0.995	0.978	1.013
	谷丙转氨酶	0.029	0.007	17.642	1	0	1.03	1.016	1.044
	谷草转氨酶	-0.044	0.013	11.929	1	0.001	0.957	0.933	0.981
	尿素	0.366	0.056	42.292	1	0	1.441	1.291	1.609
	γ-谷氨酰转肽酶	0.008	0.003	7.258	1	0.007	1.008	1.002	1.013
	高密度脂蛋白	-1.148	0.296	15.036	1	0	0.317	0.177	0.567
	空腹血糖	-0.24	0.069	12.137	1	0	0.786	0.687	0.9
	甘油三脂	0.265	0.078	11.609	1	0.001	1.303	1.119	1.517
	常量	-3.063	0.791	14.994	1	0	0.047
a 在步骤 1 输入的变量：BMI反数, 收缩压, 舒张压 , 谷丙转氨酶, 谷草转氨酶 , 尿素 , γ-谷氨酰转肽酶, 高密度脂蛋白, 空腹血糖 , 甘油三脂 。
